# Supplementary material
Source: publisher figshare collection journal article supplement (https://gsapubs.figshare.com/ndownloader/files/23306981)
Supplement: Supplementary file 1 [file 23306981]

## Sheet: Sheet1
Lab Number	County	Site	Material	Lat	Long	14C yr B.P.	±	δ13C (‰)	Source(s)	Calibrated modal age	Calibrated σ1 mean	Lithostratigraphy	Diachronic unit	Subphase/Lake Chicago	Note 1	Note 2	funding	Questionable Date?	submitter(s)	σ1 up	σ1 down	σ1 intercepts	σ1 area	σ2 up	σ2 down	σ2 mean	σ2 area	σ2 intercepts
ISGS-772	Winnebago	Nimtz Quarry	wood	42.33	-89.117	47400	1500	-25.9	Liu et al., 1986	50000	461	Winnebago Formation	Illinois Episode	empty	till		ISGS	Questionable Date	Berg	49078	50000	1	0.683078	47978	50000	1011	0.954563	1
ISGS-63	Vermilion	Higginsville	wood	40.25	-87.775	48100	1700	ND	Coleman, 1973	50000	519.5	Peddicord Tongue, Equality Fm	Michigan Subepisode	empty	proglacial lake		ISGS	Questionable Date	Johnson	48961	50000	1	0.682789	47810	50000	1095	0.954584	1
ISGS-2290	Montgomery	Bald Knob Basin	organic silty clay	39.2139	-89.2847	46200	2100	-26.4	Curry, 1995	49798	1044.5	Equality above Glasford	Michigan Subepisode	empty	gyttja	From core 422 to 440cm interval	ISGS	Questionable Date	Curry	47911	50000	1	0.682749	46326	50000	1837	0.954578	1
ISGS-3477	Fayette	Vandalia sand and gravel pit	Py-R of SOC (peat)	38.9801	-89.1197	44700	1800	-24.8	Wang et al. 2003a	48014	1385	Pearl Formation	Illinois Episode	empty	soil organic carbon	Py-R of SOC	ISGS	Questionable Date	Berg	46729	49499	1	0.682783	45624	50000	2188	0.954534	1
OxA-V-2016-37	St. Clair	MNK-3, Collinsville	wood	38.6444	-90.0144	44150	650	ND	Curry and Grimley, 2006	47340	782	Equality Fm beyond Wedron	Alton Phase		slackwater lake	MNK-3; 28.8 m	ISGS	OK	Curry	46610	48174	1	0.682716	46050	49101	1525.5	0.954543	1
ISGS-1859	Menard	Athens Quarry, North	whole soil	40.019	-89.7129	43800	3000	-28.6	Curry and Follmer, 1992	46919	1945	Roxana Silt beyond Wedron Group	Alton Phase	empty	loess		ISGS	OK	Curry/Follmer	45486	49376	1	0.682709	43821	50000	3089.5	0.954553	1
ISGS-1069	Winnebago	Oak Crest Bog	peat	42.3329	-88.9819	43800	2700	-29	Liu et al., 1986; Berg et al., 1985	46919	1866	Grayslake above Glasford	Alton Phase	empty	bog	Site 1, RCB-WB-18,19; 2.89-3.05	ISGS	OK	Berg	45534	49266	1	0.682828	44059	50000	2970.5	0.95455	1
ISGS-A0022	Jersey	ELS-1, Piasa Ck	aquatic gastropod shells	38.9396	-90.3022	43780	1590	ND	Curry and Grimley, 2006	46897	1462.5	Equality Fm beyond Wedron	Alton Phase		slackwater lake	ELS-1; 32.5 m	ISGS	OK	Grimley	45753	48678	1	0.682743	45113	50000	2443.5	0.95454	1
OxA-V-2016-39	St. Clair	MNK-3, Collinsville	wood	38.6444	-90.0144	43300	600	ND	Curry and Grimley, 2006	46407	639.5	Equality Fm beyond Wedron	Alton Phase		slackwater lake	MNK-3; 32.7 m	ISGS	OK	Curry	45856	47135	1	0.682719	45408	48009	1300.5	0.954524	1
ISGS-1045	Winnebago	Oak Crest Bog	peat	42.3329	-88.9819	43100	1100	-29.1	Liu et al., 1986; Berg et al., 1985	46234	1127.5	Grayslake above Glasford	Alton Phase	empty	bog	Site 2, RCB-4; 2.54-2.64	ISGS	OK	Berg	45347	47602	1	0.682881	44658	49161	2251.5	0.95451	1
ISGS-3955	Kane	Settler's Hill Landfill	peat	41.8764	-88.3	42070	710	-27.8	unpublished	45400	631	Robein Mbr (Roxana Silt) below Wedron Group	Alton Phase	empty	soil		ISGS	OK	Curry	44792	46054	1	0.682767	44219	46941	1361	0.954538	1
ISGS-A-0010	Jersey	ELS-1, Piasa Ck	seeds wood	38.9396	-90.3022	42000	3100	ND	Curry and Grimley, 2006	45342	2350.5	Equality Fm beyond Wedron	Alton Phase		slackwater lake	ELS-1; 32.5 m	ISGS	OK	Grimley	43465	48166	1	0.682709	42640	50000	3680	0.954517	1
ISGS-98	Whiteside	Garden Plain	organic silt	41.75	-90.15	41900	1300	ND	Coleman, 1973	45270	1273	Roxana Silt beyond Wedron Group	Alton Phase	empty	soil		ISGS	OK		44122	46668	1	0.682741	43219	48528	2654.5	0.954508	1
ISGS-1412	McHenry	Possum Run Pit	peat	42.3057	-88.2302	41800	2000	-29.3	Hansel and Johnson, 1996	45204	1879.5	Robein Mbr (Roxana Silt) below Wedron Group	Alton Phase	empty	soil		ISGS	OK		43546	47305	1	0.682743	42867	49573	3353	0.954532	1
ISGS-684	Menard	Athens Quarry North	organic debris	40.019	-89.7129	41770	1100	-29	Liu et al., 1986, Curry and Follmer, 1992	45174	1038.5	Berry Clay (top)	Alton Phase	empty	loess		ISGS	OK	Curry/Follmer	44191	46268	1	0.682773	43308	47796	2244	0.954526	1
OxA-V-2016-38	St. Clair	MNK-3, Collinsville	wood	38.6444	-90.0144	41700	550	ND	Curry and Grimley, 2006	45112	479	Equality Fm beyond Wedron	Alton Phase		slackwater lake	MNK-3; 31.2 m	ISGS	OK	Curry	44632	45590	1	0.682811	44164	46151	993.5	0.954567	1
ISGS-5911	Kendall	Fox Ridge Landfill (proposed)	peat	41.5827	-88.5187	41580	710	-28.5	unpublished	44996	622.5	Robein Mbr (Roxana Silt) below Wedron Group	Alton Phase	empty	soil	B-30-5, SS-33, 120'-122'	ISGS	OK	Fallon	44402	45647	1	0.68275	43728	46393	1332.5	0.954518	1
ISGS-375	Rock Island	Airport West	organic silt	41.437	-90.527	41200	1600	ND	Liu and Coleman, 1981	44699	1491	Robein Mbr (Roxana Silt) beyond Wedron Group	Alton Phase	empty	soil		ISGS	OK		43262	46244	1	0.682777	42539	48679	3070	0.954512	1
ISGS-6166	Peoria	Chilecothe	wood	40.9488	-89.5283	41170	680	-25.4	unpublished	44673	615.5	Robein Mbr (Roxana Silt) below Wedron Group	Alton Phase	empty	soil	1579A2	ISGS	OK	Stumpf	44069	45300	1	0.682797	43428	45903	1237.5	0.954525	1
ISGS-742	Fayette	Pittsburg Basin	gyttja	38.904	-89.1898	41110	810	-28.3	Liu et al., 1986; Grüger, 1972	44615	731.5	Equality above Glasford	Alton Phase	empty	gyttja	PBS-79D (289-291)	ISGS	Questionable Date	Wright	43888	45351	1	0.682776	43213	46125	1456	0.954544	1
ISGS-5268	Putnam	Clear Creek	wood	41.1464	-89.2644	41010	970	25.9	unpublished	44540	867.5	Robein Mbr (Roxana Silt) beyond Wedron Group	Alton Phase	empty	soil	CC-9	ISGS	OK	McKay	43646	45381	1	0.682838	42953	46453	1750	0.954502	1
ISGS-1594	Kane	Elburn S-30	organic silt	41.8979	-88.4923	41000	3100	-28.3	Curry, 1989	44532	2478	Robein Mbr (Roxana Silt) below Wedron Group	Alton Phase	empty	soil		ISGS	OK	Curry	42624	47580	1	0.682784	41898	50000	4051	0.954519	1
GrN-4408	Kane	Plano Silt	organic silt	42.0491	-88.48	41000	1500	ND	Kempton and Hackett, 1968	44532	1364.5	Robein Mbr (Roxana Silt) below Wedron Group	Alton Phase	empty	soil		ISGS	OK	Kempton	43202	45931	1	0.682839	42456	48255	2899.5	0.954525	1
ISGS-5515	Putnam	Friday Section	needle, plant macrofossils	41.1433	-89.2694	40720	860	-25.9	McKay et al., 2008	44290	760	inclusion of Peddicord Tongue in Wedron Group?	Alton Phase	empty	inclusion of lake sediment?	Friday II	ISGS	OK	Stumpf	43494	45014	1	0.682776	42919	45876	1478.5	0.954567	1
AA-57007	Putnam	Friday section, Clear Creek	wood	41.1437	-89.2713	37160	660	ND	McKay et al., 2008	44279	1227	Inclusion of Robein Mbr in Tiskilwa Fm	Alton Phase	empty	inclusion of wood		Carson	OK	Carson/Clark	43090	45544	1	0.682709	42328	47647	2659.5	0.954506	1
ISGS-3466	Henderson	Lomax	needles, wood fragments	40.6945	-91.0385	40630	890	-29.5	Curry, 1998	44232	777.5	Robein Mbr (Roxana Silt) beyond Wedron Group	Alton Phase	empty	soil	Lomax, 3.4 m below top of Robein	ISGS	OK	Curry	43402	44957	1	0.682999	42831	45865	1517	0.954534	1
ISGS-557	Kendall	Big Rock Ck.	organic silt	41.7148	-88.4936	40580	1100	ND	Liu and Coleman, 1981	44186	942.5	Robein Mbr (Roxana Silt) below Wedron Group	Alton Phase	empty	soil		ISGS	OK		43225	45110	1	0.682917	42556	46413	1928.5	0.954509	1
ISGS-562	Stephenson	Stubbe Farm	peat	42.471	-89.78	40550	1700	ND	Liu and Coleman, 1981; Whittecar and Davis, 1982	44149	1504	Henry Formation	Alton Phase	empty	soil		ISGS	OK		42792	45800	1	0.682692	42019	48466	3223.5	0.954523	1
ISGS-6001	St Clair	Fayetteville	peat	38.4228	-89.8258	40500	1200	-28.1	unpublished	44100	1021.5	Robein Mbr (Roxana Silt) beyond Wedron Group	Alton Phase	empty	soil	MSC-11-34.5	ISGS	OK	Grimley	43106	45149	1	0.682737	42392	46678	2143	0.954503	1
ISGS-559	Kendall	Big Rock Ck.	organic silt	41.7148	-88.4936	40400	1400	ND	Liu and Coleman, 1981	44004	1196	Robein Mbr (Roxana Silt) below Wedron Group	Alton Phase	empty	soil		ISGS	OK		42906	45298	1	0.682828	42126	47340	2607	0.954503	1
ISGS-393	St. Clair	Canteen Creek	wood	38.642	-90.025	40200	1500	ND	Coleman and Liu, 1981; Follmer et al., 1979	43765	1275	Roxana Silt beyond Wedron Group	Alton Phase	empty	soil		ISGS	OK		42716	45266	1	0.682776	41910	47543	2816.5	0.954523	1
ISGS-750	Fayette	Pittsburg Basin	gyttja	38.904	-89.1898	40030	990	-26.8	Liu et al., 1986; Grüger, 1972	43586	816.5	Grayslake above Glasford	Alton Phase	empty	gyttja	PBS-79D (281-283)	ISGS	Questionable Date	Wright	42925	44558	1	0.68297	42366	45612	1623	0.954542	1
ISGS-211	Vermilion	Emerald Pond	wood	40.146	-87.731	40000	1100	ND	Coleman and Liu, 1975	43547	902.5	Robein Mbr (Roxana Silt) below Wedron Group	Alton Phase	empty	soil		ISGS	OK		42840	44645	1	0.682766	42215	45873	1829	0.954537	1
ISGS-124	De Kalb	Larsen Quarry	wood	41.945	-88.653	39900	1300	ND	Coleman, 1974	43467	1068.5	Inclusion of Robein Mbr in Tiskilwa Fm	Alton Phase	empty	inclusion of wood		ISGS	OK		42657	44794	1	0.682717	41912	46455	2271.5	0.95451	1
ISGS-739	Fayette	Pittsburg Basin	gyttja	38.904	-89.1898	39800	1200	-25.5	Liu et al., 1986; Grüger, 1972	43387	976.5	Equality above Glasford	Alton Phase	empty	gyttja	PBS-79D (269-271)	ISGS	Questionable Date	Wright	42650	44603	1	0.682892	41974	46011	2018.5	0.954503	1
ISGS-748	Fayette	Pittsburg Basin	gyttja	38.904	-89.1898	39800	1200	-25.5	Liu et al., 1986; Grüger, 1972	43387	976.5	Equality above Glasford	Alton Phase	empty	gyttja	PBS-79D (269-271)	ISGS	Questionable Date	Wright	42650	44603	1	0.682892	41974	46011	2018.5	0.954503	1
UCIAMS-152228	DeKalb	DeKalb, behind Schnucks	wood, leaves	41.9193	-88.7784	39400	1200	ND	unpublished	43100	963.5	DeKalb Mounds	Alton Phase	empty	reworked wood in IWLP	Schnucks 278-280	ISGS	OK		42388	44315	1	0.682835	41711	45701	1995	0.954503	1
ISGS-1426	Kane	Fox River Stone	wood	41.9829	-88.3372	39400	1800	-22.8	Curry et al., 1999	43100	1553	Inclusion of Robein Mbr in Tiskilwa Fm	Alton Phase	empty	inclusion of wood		ISGS	OK	Curry	41996	45102	1	0.682786	40899	48048	3574.5	0.954524	1
ISGS-64	Whiteside	Garden Plain	organic silt	41.75	-90.15	39000	1100	ND	Coleman, 1973	42840	869.5	Roxana Silt beyond Wedron Group	Alton Phase	empty	soil		ISGS	OK		42153	43892	1	0.682912	41546	45145	1799.5	0.954527	1
ISGS-654	Menard	Athens Quarry North	organic silt	40.0123	-89.7046	38920	1100	-27.9	Liu and Coleman, 1981	42796	866.5	Robein Mbr (Roxana Silt) beyond Wedron Group	Alton Phase	empty	soil		ISGS	OK	Curry/Follmer	42094	43827	1	0.682858	41481	45091	1805	0.954518	1
UCIAMS-71282	Kendall	Newark IWLP	wood	41.5166	-88.5513	38750	440	ND	Curry and Petras, 2011	42686	303	Marseilles MS IWLP	Alton Phase	empty	reworked wood in lake sediment		ISGS	OK		42396	43002	1	0.683313	42106	43371	632.5	0.954538	1
CAMS-7591	McHenry	Hebron	organic silt	42.4913	-88.4633	38560	5000	ND	Curry and Pavich, 1994	42576	3925	Robein Mbr (Roxana Silt) below Wedron Group	Michigan Subepisode	empty	soil; large error		ISGS	OK	Curry	39793	47643	1	0.682705	37408	50000	6296	0.954516	1
ISGS-1156	Winnebago	Oak Crest Bog	peat	42.3361	-88.9819	38210	930	-27.6	Liu et al., 1986; Berg et al., 1985	42354	674.5	Robein Mbr (Roxana Silt) beyond Wedron Group	Alton Phase	empty	bog		ISGS	OK	McKay	41725	43074	1	0.682852	41084	44169	1542.5	0.954518	1
ISGS-2993	Woodford	Low Point	wood	40.8747	-89.3528	38200	1200	-25.2	Hansel and Johnson, 1996	42347	952.5	Robein Mbr (Roxana Silt) below Wedron Group	Alton Phase	empty	soil	RC-6	ISGS	OK	Johnson	41478	43383	1	0.682771	40558	44818	2130	0.954502	1
ISGS-1693	Will	Avery Pit	wood	41.6788	-88.1747	38100	1400	-25.8	Hansel and Johnson, 1996	42292	1182	Peddicord Tongue, Equality Fm	Alton Phase	empty	reworked in lake sediment under boulder		ISGS	OK		41227	43591	1	0.68274	40096	45304	2604	0.954531	1
ISGS-11	Fayette	Pittsburg Basin	organic gyttja	38.9041	-89.1878	38100	1000	ND	Kim, 1970	42292	743	Equality beyond Wedron	Michigan Subepisode	empty	gyttja		ISGS	Questionable Date		41588	43074	1	0.682817	40830	44250	1710	0.954515	1
I-847	McHenry	NIPC-3	peat	42.4209	-88.4138	38000	3000	ND	Kempton and Hackett, 1968	42229	2958.5	Robein Mbr (Roxana Silt) below Wedron Group	Alton Phase	empty	soil	105-106.5 ft depth	ISGS	OK		39745	45662	1	0.682746	38546	49677	5565.5	0.954516	1
ISGS-423	Piatt	Monticello Pit	organic silt	40.039	-88.582	37950	700	ND	Liu and Coleman, 1981	42202	477	Robein Mbr (Roxana Silt) below Wedron Group	Alton Phase	empty	soil		ISGS	OK	Johnson/King	41739	42693	1	0.683029	41209	43285	1038	0.95454	1
ISGS-2708	Livingston	Fairbury	wood	40.7472	-88.5667	37900	1900	-26.3	Hansel and Johnson, 1996	42171	1786.5	Robein Mbr (Roxana Silt) below Wedron Group	Alton Phase	empty	soil	AKH-7-93-4	ISGS	OK	Hansel	40548	44121	1	0.68279	38940	46964	4012	0.95451	1
ISGS-1073	Winnebago	Oak Crest Bog	peat	42.3329	-88.9819	37900	1300	-28	Liu et al., 1986; Berg et al., 1985	42171	1075	Grayslake above Glasford	Alton Phase	empty	bog	Site 1, RCB-WB-18,19; 2.89-3.05	ISGS	OK	Berg	41139	43289	1	0.682778	40071	44839	2384	0.954526	1
ISGS-A-0144	St. Clair	CAH-8, Cahokia	wood	38.5247	-90.1407	37840	790	ND	Curry and Grimley, 2006	42135	555.5	Equality Fm beyond Wedron	Alton Phase		slackwater lake	CAH-8; 24.7 m	ISGS	OK	Phillips	41589	42700	1	0.682804	40910	43415	1252.5	0.954553	1
ISGS-1042	McDonough	McKee Farm	organic silt	40.5191	-90.6755	37800	2100	-29	Liu et al., 1986	42108	2027.5	Robein Mbr (Roxana Silt) beyond Wedron Group	Alton Phase	empty	soil	McKee Farm; MF-2	ISGS	OK	King	40254	44309	1	0.682711	38667	47675	4504	0.954505	1
ISGS-975	McDonough	McKee Farm	organic silt	40.5191	-90.6755	37700	1400	-29	Liu et al., 1986	42048	1200.5	Robein Mbr (Roxana Silt) beyond Wedron Group	Alton Phase	empty	soil	McKee Farm; MF-A	ISGS	OK	Graham	40835	43236	1	0.682857	39684	44966	2641	0.954506	1
ISGS-238	Kane	Carpentersville Pit	wood	42.145	-88.27	37600	1300	ND	Coleman and Liu, 1975; Wickham et al., 1988	41988	1091	Robein Mbr (Roxana Silt) below Wedron Group	Alton Phase	empty	soil		ISGS	OK		40863	43045	1	0.682875	39756	44579	2411.5	0.954534	1
ISGS-97	Whiteside	Union Grove	organic silt	41.763	-90.03	37420	710	ND	Coleman, 1973	41875	525	Roxana Silt beyond Wedron Group	Alton Phase	empty	soil		ISGS	OK		41333	42383	1	0.683082	40654	42915	1130.5	0.954552	1
ISGS-624	Lee	Amboy Wes	organic silt	41.7242	-89.4028	37290	790	ND	Liu and Coleman, 1981	41793	611	Robein Mbr (Roxana Silt) beyond Wedron Group	Alton Phase	empty	soil		ISGS	OK		41149	42371	1	0.682863	40360	42945	1292.5	0.954571	1
ISGS-71	Fayette	Pittsburg Basin	gyttja	38.904	-89.1898	37200	900	ND	Coleman, 1973	41726	722.5	Equality Formation	Michigan Subepisode	empty	kettle	J-5; 295-297	ISGS	Questionable Date	Jacobs	40950	42395	1	0.682733	40064	43093	1514.5	0.954544	1
UCIAMS-110611	McHenry	Huntley	moss fragments; aquatic leaves	42.1627	-88.4358	37150	490	ND	unpublished	41687	377	pre-Batestown tongue	Alton Phase	empty	reworked wood in proglacial lake sediment	HUN 08_01 55-55.5	ISGS	OK		41299	42053	1	0.683196	40813	42415	801	0.954564	1
ISGS-883	Menard	Athens Quarry North	organic silt	40.019	-89.7129	37100	1200	-26.9	Liu et al., 1986, Curry and Follmer, 1992	41655	1016	Robein Mbr (Roxana Silt) below Wedron Group	Alton Phase	empty	soil		ISGS	OK	Curry/Follmer	40513	42545	1	0.682742	39372	43812	2220	0.954536	1
ISGS-1398	Kane	Oakhurst Forest Preserve	wood	41.7479	-88.2707	37100	2000	-26.7	Hansel and Johnson, 1996	41655	1936.5	Inclusion of Robein Mbr in Tiskilwa Fm	Alton Phase	empty	soil		ISGS	OK		39589	43462	1	0.682765	38044	46883	4419.5	0.954513	1
ISGS-1339	Kane	Van Acker Pit	organic silt	41.9774	-88.3125	37100	2000	-21	Hansel and Johnson, 1996	41655	1936.5	Robein Mbr (Roxana Silt) below Wedron Group	Alton Phase	empty	soil		ISGS	OK		39589	43462	1	0.682765	38044	46883	4419.5	0.954513	1
ISGS-3478	Fayette	Vandalia sand and gravel pit	Py-V of SOC (peat)	38.9792	-89.1167	37100	1800	-24.8	Wang et al. 2003a	41655	1682	Tenneriffe	Alton Phase	empty	soil organic carbon	Py-R of SOC yielded >53,400 C-14 yr BP (ISGS-3479)	ISGS	Questionable Date	Berg	39815	43179	1	0.682754	38402	45871	3734.5	0.954508	1
ISGS-5672	Kane	Elburn	wood	41.8672	-88.4721	37000	440	-24.7	unpublished	41583	356.5	Robein Mbr (Roxana Silt) below Wedron Group	Alton Phase	empty	reworked	Konen #1	ISGS	OK	Curry	41216	41929	1	0.683251	40746	42244	749	0.954519	1
W-869	Alexander	Gale loess section	terrestrial snail shells	37.25	-89.4333	37000	1500	ND	Rubin and Alexander, 1960	41583	1332	Roxana Silt beyond Wedron Group	Alton Phase	empty	soil		USGS	OK		40087	42751	1	0.682752	38753	44558	2902.5	0.954505	1
ISGS-1910	Menard	Athens Quarry, North	whole soil	40.019	-89.7129	36930	770	-28.2	Curry and Follmer, 1992	41536	644	Roxana Silt beyond Wedron Group	Alton Phase	empty	soil		ISGS	OK	Curry/Follmer	40819	42107	1	0.683045	40067	42661	1297	0.954562	1
ISGS-1904	Menard	Athens Quarry, North	whole soil	40.019	-89.7129	36800	1200	-27.1	Curry and Follmer, 1992	41443	1038.5	Roxana Silt beyond Wedron Group	Alton Phase	empty	soil		ISGS	OK	Curry/Follmer	40241	42318	1	0.682898	39018	43426	2204	0.954534	1
ISGS-1295	Kane	Hampshire; F-4	organic silt	42.0439	-88.5127	36600	3200	-25.9	Curry, 1989	41271	3394	Robein Mbr (Roxana Silt) below Wedron Group	Alton Phase	empty	soil		ISGS	OK	Curry	38175	44963	1	0.682698	36314	49203	6444.5	0.954523	1
ISGS-1898	Menard	Athens Quarry, North	whole soil	40.019	-89.7129	36160	950	-28.2	Curry and Follmer, 1992	40852	889	Roxana Silt beyond Wedron Group	Alton Phase	empty	soil		ISGS	OK	Curry/Follmer	39889	41667	1	0.682962	38926	42383	1728.5	0.954542	1
ISGS-392	St. Clair	Canteen Creek	terrestrial snail shells	38.642	-90.025	36100	550	ND	Coleman and Liu, 1981; Follmer et al., 1979	40761	557.5	Roxana Silt beyond Wedron Group	Alton Phase	empty	soil		ISGS	OK		40192	41307	1	0.682721	39630	41789	1079.5	0.95451	1
ISGS-4181	Monroe	Fogelpole Cave	Py-R of SOC	38.1917	-90.1333	35990	890	-16.5	Panno et al., 2004	40631	862	unnamed unit	Alton Phase	empty	SOM in cave sediment	F98D-Residue	ISGS	OK	Panno/Wang	39770	41494	1	0.682955	38870	42165	1647.5	0.954535	1
ISGS-157	St. Clair	French Village	terrestrial snail shells	38.602	-90.051	35750	760	ND	Coleman, 1974	40342	786.5	Roxana Silt beyond Wedron Group	Alton Phase	empty	soil		ISGS	OK		39628	41201	1	0.68287	38855	41814	1479.5	0.954563	1
ISGS-870	Menard	Athens Quarry North	organic silt	40.019	-89.7129	35750	6620	-28.4	Liu et al., 1986, Curry and Follmer, 1992	40342	5249.5	Robein Mbr (Roxana Silt) below Wedron Group	Farmdale Phase	empty	soil; large error		ISGS	Questionable Date	Curry/Follmer	35855	46354	1	0.682738	33890	50000	8055	0.954501	1
ISGS-374	Ogle	Mt. Morris core	organic silt	42.028	-89.431	35600	1000	ND	Liu and Coleman, 1981	40196	1007	Robein Mbr (Roxana Silt) beyond Wedron Group	Alton Phase	empty	soil		ISGS	OK		39228	41242	1	0.682947	38388	42165	1888.5	0.95452	1
ISGS-3098	Woodford	Richland Creek section	wood	40.8747	-89.3528	35600	900	-25.7	Hansel and Johnson, 1996	40196	923.5	Robein Mbr (Roxana Silt) below Wedron Group	Alton Phase	empty	soil	RC-1	ISGS	OK	Johnson	39326	41173	1	0.682752	38541	41945	1702	0.954544	1
ISGS-688	Menard	Athens Quarry North	base soluble of ISGS-684	40.019	-89.7129	35560	900	-28.8	Liu et al., 1986, Curry and Follmer, 1992	40157	928	Robein Mbr (Roxana Silt) below Wedron Group	Alton Phase	empty	soil		ISGS	OK	Curry/Follmer	39274	41130	1	0.682824	38507	41927	1710	0.954564	1
ISGS-6530	Champaign	UIUC campus (ISTC building)	organic debris	40.0903	-88.243	35440	670	-28.1	unpublished	40032	744	Robein Mbr (Roxana Silt) below Wedron Group	Alton Phase	empty	soil	Cham-09-02A	ISGS	OK	Stumpf	39316	40804	1	0.682808	38707	41446	1369.5	0.954517	1
ISGS-4180	Monroe	Fogelpole Cave	Py-V of SOC	38.1917	-90.1333	35290	800	-15.9	Panno et al., 2004	39887	859.5	unnamed unit	Alton Phase	empty	cave	F98D-Volatile	ISGS	OK	Panno/Wang	39013	40732	1	0.682769	38415	41611	1598	0.954517	1
ISGS-5636	Marshall	Big Sandy section	calcite	41.1008	-89.3299	35230	270	-4.4	McKay et al., 2008	39810	337	Pearl Formation	Alton Phase	empty	calcite cement	SC-A; calcite cementing sand	ISGS	OK	McKay	39472	40146	1	0.683269	39095	40477	691	0.954583	1
W-729	Madison	Pleasant Grove	terrestrial snail shells	38.602	-90.051	35200	1000	ND	Rubin and Alexander, 1960	39780	1046	Roxana Silt beyond Wedron Group	Alton Phase	empty	soil		USGS	OK		38763	40855	1	0.682771	37752	41982	2115	0.954504	1
AA-57006	Putnam	Friday section, Clear Creek	wood	41.1437	-89.2713	35010	500	ND	McKay et al., 2008	39577	564	Inclusion of Robein Mbr in Tiskilwa Fm	Alton Phase	empty	inclusion of wood		Carson	OK	Carson/Clark	38972	40100	1	0.682739	38555	40739	1092	0.954604	1
W-1450	McHenry	NIPC-3	organic silt	42.2143	-88.5975	35000	2500	ND	Kempton and Hackett, 1968	39566	2741	Robein Mbr (Roxana Silt) below Wedron Group	Alton Phase	empty	soil		ISGS	OK		36718	42200	1	0.682733	34831	46593	5881	0.954505	1
ISGS-2707	La Salle	Wedron	wood	41.425	-88.7806	34960	820	-26.5	Fox et al., 2015	39511	881.5	Robein Mbr (Roxana Silt) below Wedron Group	Alton Phase	empty	soil	AKH-5-93-1	ISGS	OK	Munson	38651	40414	1	0.682809	37840	41502	1831	0.954511	1
ISGS-1133	McDonough	McKee Farm	peat, organic silt	40.5044	-90.6754	34920	590	-29.3	Hansel and Johnson, 1996	39453	641	Robein Mbr (Roxana Silt) beyond Wedron Group	Alton Phase	empty	soil		ISGS	OK	Graham	38808	40090	1	0.6828	38373	40915	1271	0.954538	1
ISGS-106	Whiteside	Garden Plain	organic silt	41.75	-90.15	34630	550	ND	Coleman, 1973	39083	585.5	Roxana Silt beyond Wedron Group	Alton Phase	empty	soil		ISGS	OK		38593	39764	1	0.68284	38026	40580	1277	0.954511	1
ISGS-1890	Menard	Athens Quarry, North	whole soil	40.019	-89.7129	34310	640	-28.7	Curry and Follmer, 1992	38751	770.5	Roxana Silt beyond Wedron Group	Alton Phase	empty	soil		ISGS	OK	Curry/Follmer	38166	39707	1	0.682753	37032	40376	1672	0.954527	1
ISGS-6183	McHenry	Marengo	wood	42.7856	-88.5992	34300	1100	-25.5	unpublished	38743	1357.5	Robein Mbr (Roxana Silt) below Wedron Group	Alton Phase	empty	soil	175 ft below surface, private well	ISGS	OK	Shriver	37444	40159	1	0.682771	36328	41344	2508	0.954501	1
ISGS-490	Piatt	Monticello Pit	organic silt	40.039	-88.582	34290	840	ND	Liu and Coleman, 1981	38739	1055.5	Robein Mbr (Roxana Silt) below Wedron Group	Alton Phase	empty	soil		ISGS	OK	Johnson/King	37790	39901	1	0.68272	36642	40810	2084	0.954552	1
ISGS-1889	Menard	Athens Quarry, North	whole soil	40.019	-89.7129	34230	710	-28.2	Curry and Follmer, 1992	38687	898.5	Roxana Silt beyond Wedron Group	Alton Phase	empty	soil		ISGS	OK	Curry/Follmer	37895	39692	1	0.682762	36783	40433	1825	0.954549	1
ISGS-1626	Piatt	Monticello Pit	organic silt	40.0533	-88.5747	34200	1300	-28.8	Curry, 1989	38664	1559	Robein Mbr (Roxana Silt) below Wedron Group	Alton Phase	empty	soil		ISGS	OK	Johnson/King	37012	40130	1	0.682722	35975	41703	2864	0.954533	1
ISGS-67	Fayette	Pittsburg Basin	gyttja	38.904	-89.1898	34000	1200	ND	Coleman, 1973	38520	1458	Equality Formation	Michigan Subepisode	empty	kettle	J-4; 263-265	ISGS	Questionable Date	Jacobs	36865	39781	1	0.682844	35911	41349	2719	0.954532	1
ISGS-1448	Kane	Van Acker Pit	organic silt in crevice	41.9774	-88.3125	33800	1500	-23.1	Curry et al., 1999	38382	1737	Robein Mbr (Roxana Silt) below Wedron Group	Alton Phase	empty	soil		ISGS	OK	Curry	36392	39866	1	0.682775	35219	41783	3282	0.954521	1
ISGS-2049	Kane	Sleepy Hollow	organic silt	42.0932	-88.3156	33500	690	-28.2	Curry et al., 1999	38048	877.5	Robein Mbr (Roxana Silt) below Wedron Group	Alton Phase	empty	soil		ISGS	OK	Curry	36836	38591	1	0.682795	36176	39524	1674	0.954528	1
ISGS-3863	Kane	Prairie Pit	Organics and moss	41.85	-88.5	33280	720	-28.4	Curry et al., 1999	37636	893	Robein Mbr (Roxana Silt) below Wedron Group	Alton Phase	empty	inclusion in diamicton	ECS	ISGS	OK	Grimley	36615	38401	1	0.682833	35891	39361	1735	0.954561	1
ISGS-749	Winnebago	Oak Crest Bog	peat	42.3329	-88.9819	33220	710	-28.4	Liu et al., 1986; Berg et al., 1985	37510	883	Robein Mbr (Roxana Silt) beyond Wedron Group	Alton Phase	empty	bog	Site 1, RCB-WB-6; 1.98-2.29	ISGS	OK	Berg	36573	38339	1	0.682839	35829	39245	1708	0.954503	1
ISGS-2992	Woodford	Low Point	wood	40.8747	-89.3528	33070	710	-25.6	Hansel and Johnson, 1996	37060	887.5	Robein Mbr (Roxana Silt) below Wedron Group	Alton Phase	empty	soil	RC-5	ISGS	OK	Johnson	36424	38199	1	0.682704	35661	39054	1696.5	0.9545	1
ISGS-673	Sangamon	Sugar Creek	wood	39.7861	-89.5778	33000	1000	-25	Liu et al., 1986	36931	1183.5	Roxana Silt beyond Wedron Group	Alton Phase	empty	soil		ISGS	OK		36101	38468	1	0.682799	35092	39795	2351.5	0.954516	1
ISGS-1860	Menard	Athens Quarry, North	whole soil	40.019	-89.7129	32800	3200	-28.9	Curry and Follmer, 1992	36659	3692.5	Roxana Silt beyond Wedron Group	Alton Phase	empty	loess		ISGS	OK	Curry/Follmer	34116	41501	1	0.682722	31954	47665	7855.5	0.954513	1
ISGS-681	Coles	Ashmore	organic silt	39.4881	-88.0222	32620	650	-28.1	Liu et al., 1986	36466	869.5	Robein Mbr (Roxana Silt) below Wedron Group	Alton Phase	empty	soil	DAA-19; 36.6 m	ISGS	OK		35918	37657	1	0.682807	35326	38496	1585	0.954542	1
ISGS-4394	Logan	Lincoln Quarry	wood	40.1333	-89.45	32600	920	-26.9	unpublished	36443	1140	Robein Mbr (Roxana Silt) beyond Wedron Group	Alton Phase	empty	soil	LQ-26.2	ISGS	OK	Curry	35708	37988	1	0.682903	34828	39105	2138.5	0.954537	1
GrN-4468	Kane	Plano Silt	organic silt	41.8539	-88.4159	32600	520	ND	Kempton and Hackett, 1968	36443	725.5	Robein Mbr (Roxana Silt) below Wedron Group	Alton Phase	empty	soil	Check of I-847	ISGS	OK		35980	37431	1	0.6827	35555	38279	1362	0.954541	1
ISGS-738	Fayette	Pittsburg Basin	gyttja	38.904	-89.1898	32590	930	-24.8	Liu et al., 1986; Grüger, 1972	36434	1150	Equality above Glasford	Alton Phase	empty	gyttja	PBS-79D (263-265)	ISGS	Questionable Date	Wright	35689	37989	1	0.682724	34808	39126	2159	0.954533	1
ISGS-4501	Pulaski	Mounts	woody plant debris	37.1138	-89.2623	32500	1100	-26.6	unpublished	36357	1320	Equality Formation beyond Wedron Group	Alton Phase	empty	slackwater	Cache #4	ISGS	OK	Nelson	35478	38118	1	0.682798	34558	39600	2521	0.954519	1
ISGS-2944	Mason	Smith Lake	wood	40.1417	-89.8125	32130	520	-28.9	Hansel and Johnson, 1996	36070	620	Robein Mbr (Roxana Silt) beyond Wedron Group	Alton Phase	empty	kettle/soil	Smith 1172	ISM	OK	Curry	35403	36643	1	0.682937	34937	37667	1365	0.954519	1
ISGS-5671	Peoria	Chilecothe	organic debris	40.958	-89.5366	32000	470	-17.3	unpublished	35934	517	Robein Mbr (Roxana Silt) below Wedron Group	Alton Phase	empty	soil	1577-4	ISGS	OK	Stumpf	35359	36393	1	0.682707	34858	37201	1171.5	0.954511	1
ISGS-4816	Lake	Wauconda	wood	42.2593	-88.1419	31850	780	-25.3	unpublished	35742	886	Robein Mbr (Roxana Silt) below Wedron Group	Alton Phase	empty	wood in outwash	wood in proglacial Haeger	ISGS	OK	Hansel	34871	36643	1	0.682792	34440	38143	1851.5	0.954546	1
UCIAMS-153754	Mason	Smith Lake	wood	40.1484	-89.8136	31810	290	ND	unpublished	35706	327	Robein Mbr (Roxana Silt) beyond Wedron Group	Alton Phase	empty	kettle/soil	Smith Lake 1141	ISGS	OK	Curry	35399	36053	1	0.682881	35060	36306	623	0.954584	1
AA-57003	Putnam	Friday section, Clear Creek	wood	41.1437	-89.2713	31630	370	ND	McKay et al., 2008	35525	399	Inclusion of Robein Mbr in Tiskilwa Fm	Alton Phase	empty	inclusion of wood		Carson	OK	Carson/Clark	35119	35917	1	0.682857	34798	36280	741	0.954577	1
ISGS-479	Stephenson	Stubbe Farm	peat	42.471	-89.78	31400	740	ND	Liu and Coleman, 1981; Whittecar and Davis, 1982	35250	743.5	Henry Formation	Alton Phase	empty	soil		ISGS	OK		34636	36123	1	0.68281	33995	37346	1675.5	0.954512	1
AA-57004	Putnam	Friday section, Clear Creek	wood	41.1437	-89.2713	31380	320	ND	McKay et al., 2008	35224	338.5	Inclusion of Robein Mbr in Tiskilwa Fm	Alton Phase	empty	inclusion of wood		Carson	OK	Carson/Clark	34923	35600	1	0.682734	34678	35992	657	0.954524	1
ISGS-1905	Menard	Athens Quarry, North	whole soil	40.019	-89.7129	31110	450	-21.2	Curry and Follmer, 1992	34962	443	Roxana Silt beyond Wedron Group	Alton Phase	empty	loess		ISGS	OK	Curry/Follmer	34614	35500	1	0.683211	34226	36013	893.5	0.954605	1
ISGS-3185	Kane	Fox River Stone Co	wood	41.9829	-88.3372	31050	810	-25.8	Curry et al., 1999	34915	794.5	Inclusion of Robein Mbr in Tiskilwa Fm	Alton Phase	empty	inclusion of wood		ISGS	OK	Curry	34245	35834	1	0.682885	33649	37124	1737.5	0.954533	1
ISGS-4652	Monroe	Fogelpole Cave	Py-V of SOC	38.1917	-90.1333	31010	630	-19.4	Panno et al., 2004	34887	611.5	unnamed unit	Michigan Subepisode	empty	cave	G1-D, Volatile	ISGS	OK	Panno/Wang	34368	35591	1	0.682942	33907	36292	1192.5	0.954529	1
ISGS-400	St. Clair	Bunkum Borrow	terrestrial snail shells	38.619	-90.381	30980	400	ND	Liu and Coleman, 1981	34863	396.5	Roxana Silt beyond Wedron Group	Alton Phase	empty	soil		ISGS	OK		34527	35320	1	0.683179	34161	35766	802.5	0.954631	1
ISGS-5315	McHenry	Prairieview Ed Center (Burtons Bridge)	peat	42.2647	-88.2389	30950	250	-28.4	unpublished	34836	243.5	Robein Mbr (Roxana Silt) below Wedron Group	Alton Phase	empty	soil	WAUC-02-12/124	ISGS	OK	Barnhardt	34611	35098	1	0.682697	34368	35434	533	0.954542	1
ISGS-4130	Champaign	Champaign. flood control basin	wood	40.1111	-88.2399	30800	2400	-25.6	unpublished	34721	2953.5	Robein Mbr (Roxana Silt) below Wedron Group	Alton Phase	empty	reworked wood in proglacial lake sediment	BB	ISGS	OK	Grimley	32607	38514	1	0.682733	30954	42955	6000.5	0.9545	1
ISGS-4928	Monroe	Fogelpole Cave	organic silt	38.1917	-90.1333	30800	340	-15.1	Panno et al., 2004	34721	328.5	unnamed unit	Michigan Subepisode	empty	cave	Fogelpole	ISGS	OK	Panno/Wang	34394	35051	1	0.682769	34101	35451	675	0.954528	1
ISGS-37	Douglas	Tuscola Borrow Pit	organic silt	39.787	-88.241	30700	500	ND	Coleman, 1972	34643	462	Robein Mbr (Roxana Silt) below Wedron Group	Alton Phase	empty	soil		ISGS	OK		34169	35093	1	0.683122	33849	35701	926	0.954567	1
ISGS-4651	Monroe	Fogelpole Cave	Py-R of SOC	38.1917	-90.1333	30510	470	-18.1	Panno et al., 2004	34502	405.5	unnamed unit	Michigan Subepisode	empty	cave	G1-B&C, Residual	ISGS	OK	Panno/Wang	34065	34876	1	0.683103	33758	35446	844	0.95454	1
ISGS-1625	Piatt	Monticello Pit	organic silt	40.0533	-88.5747	30400	1600	-27.7	Curry, 1989	34402	1887	Robein Mbr (Roxana Silt) below Wedron Group	Alton Phase	empty	soil		ISGS	OK	Johnson/King	32751	36525	1	0.682757	31368	39092	3862	0.954501	1
ISGS-1640	Will	Avery Pit	wood	41.6788	-88.1747	30400	2600	-27.6	Hansel and Johnson, 1996	34402	3214.5	Peddicord Tongue, Equality Fm	Michigan Subepisode	empty	reworked in lake sediment under boulder		ISGS	OK		31778	38207	1	0.682763	30412	44126	6857	0.954502	1
ISGS-4091	Monroe	Fogelpole Cave	organic silt	38.1917	-90.1333	29900	790	-18.6	Panno et al., 2004	33977	776.5	unnamed unit	Michigan Subepisode	empty	cave	F98-B2	ISGS	OK	Panno/Wang	33254	34807	1	0.682915	32199	35752	1776.5	0.954541	1
ISGS-5387	Kane	Elburn, 1 mile south	wood	41.8672	-88.4721	29790	630	-25.3	unpublished	33902	596.5	Robein Mbr (Roxana Silt) below Wedron Group	Alton Phase	empty	reworked wood in proglacial lake sediment	Konen-1	ISGS	OK	Curry	33370	34563	1	0.682928	32523	35203	1340	0.954513	1
ISGS-2926	Woodford	Richland Creek section	organic silt	40.8747	-89.3528	29760	750	-25.3	Hansel and Johnson, 1996	33886	750	Robein Mbr (Roxana Silt) beyond Wedron Group	Farmdale Phase (min)	empty	soil	RC-8	ISGS	OK	Johnson	33141	34641	1	0.682961	32072	35459	1693.5	0.954547	1
ISGS-1888	Menard	Athens Quarry, North	whole soil	40.019	-89.7129	29620	630	-28.6	Curry and Follmer, 1992	33792	634	Robein Mbr (Roxana Silt) beyond Wedron Group	Farmdale Phase (min)	empty	soil		ISGS	OK	Curry/Follmer	33115	34383	1	0.682703	32208	34996	1394	0.954553	1
ISGS-A-0011	Jersey	ELS-1, Piasa Ck	Needles	38.9396	-90.3022	29600	700	ND	Curry and Grimley, 2006	33779	719.5	Equality Fm beyond Wedron	Alton Phase		slackwater lake	ELS-1; 20.3 m	ISGS	OK	Grimley	33001	34440	1	0.682948	31941	35080	1569.5	0.954514	1
ISGS-1872	Kane	Fox River Stone	whole soil	41.9829	-88.3372	29500	1000	-25.1	Curry et al., 1999	33712	1087.5	Robein Mbr (Roxana Silt) below Wedron Group	Alton Phase	empty	soil		ISGS	OK	Curry	32488	34663	1	0.682868	31412	35700	2144	0.954553	1
ISGS-1534	Henderson	Biggsville	organic silt	40.8528	-90.8798	29500	1500	-29	Baker et al., 1989	33712	1644	Robein Mbr (Roxana Silt) beyond Wedron Group	Farmdale Phase (min)	empty	soil	BGB1-4	Hallberg	OK	Hallberg	31747	35035	1	0.682761	30996	37870	3437	0.954501	1
ISGS-4094	Monroe	Fogelpole Cave	Py-R of SOC	38.1917	-90.1333	29440	830	-18.9	Panno et al., 2004	33675	900	unnamed unit	Michigan Subepisode	empty	cave	F98-B-Residual	ISGS	OK	Panno/Wang	32648	34448	1	0.682782	31555	35147	1796	0.954538	1
AA-97887UF	Randolph	IL.37.Chester	Mammut americanum	37.8993	-89.8264	29340	940	-20.5	Widga et al., 2017	33601	1031	Peddicord Tongue, Equality Fm	Michigan Subepisode	empty	slackwater		ISM	OK	Widga	32368	34430	1	0.682759	31383	35326	1971.5	0.95453	1
ISGS-1873	Menard	Athens Quarry, North	whole soil	40.019	-89.7129	29220	630	-28.1	Curry and Follmer, 1992	33504	697.5	Robein Mbr (Roxana Silt) beyond Wedron Group	Farmdale Phase (min)	empty	soil		ISGS	OK	Curry/Follmer	32628	34023	1	0.682998	31725	34535	1405	0.954508	1
ISGS-4088	Monroe	Fogelpole Cave	Py-V of SOC	38.1917	-90.1333	29140	580	-16.2	Panno et al., 2004	33431	654	unnamed unit	Michigan Subepisode	empty	cave	F-98C, Volatile	ISGS	OK	Panno/Wang	32608	33916	1	0.682879	31713	34349	1318	0.954577	1
ISGS-118	Sangamon	Sangamon R., B-8	wood	39.79	-89.55	29140	270	ND	Coleman, 1974; Miller, 1973	33431	305	Equality Formation beyond Wedron	Michigan Subepisode	empty	alluvium		ISM	OK	Miller	33049	33659	1	0.683306	32680	33890	605	0.954515	1
OxA-V-2016-36	St. Clair	MNK-3, Collinsville	wood	38.6444	-90.0144	29030	210	ND	Curry and Grimley, 2006	33316	267.5	Equality Fm beyond Wedron	Alton Phase		slackwater lake	MNK-3; 25.8 m	ISGS	OK	Curry	32991	33526	1	0.682774	32693	33734	520.5	0.954594	1
W-526	Cass	Virginia	wood	39.9166	-90.2	29000	1200	ND	Rubin and Alexander, 1960	33280	1229.5	Robein Mbr (Roxana Silt) beyond Wedron Group	Farmdale Phase (min)	empty	soil		USGS	OK		31659	34118	1	0.682765	30990	35822	2416	0.954518	1
ISGS-408	Piatt	Monticello Pit	organic silt	40.039	-88.582	28970	290	ND	Liu and Coleman, 1981	33231	360.5	Robein Mbr (Roxana Silt) below Wedron Group	Farmdale Phase (min)	empty	soil		ISGS	OK	Johnson/King	32830	33551	1	0.682886	32290	33816	763	0.954589	1
UCIAMS-110612	McHenry	Huntley	moss fragments; aquatic leaves	42.1627	-88.4358	28910	180	ND	unpublished	33100	259	Ashmore Tongue	Michigan Subepisode	empty	outwash	HUN 08_01 190.3-190.8	ISGS	OK		32877	33395	1	0.682713	32583	33612	514.5	0.95462	1
ISGS-1637	Henderson	Lomax	organic debris	40.6945	-91.0385	28900	1500	-25	Curry, 1998	33094	1513.5	Robein Mbr (Roxana Silt) beyond Wedron Group	Farmdale Phase (min)	empty	soil	2.2 m below top of Robein	ISGS	OK	Curry	31372	34399	1	0.682751	30504	37323	3409.5	0.954509	1
ISGS-1533	Henderson	Biggsville	organic silt	40.8528	-90.8798	28750	520	-28.9	Baker et al., 1989	32906	677	Robein Mbr (Roxana Silt) beyond Wedron Group	Farmdale Phase (min)	empty	soil	BGB1-3	Hallberg	OK	Hallberg	32156	33510	1	0.682856	31529	33859	1165	0.954549	1
ISGS-4662	Monroe	Fogelpole Cave	organic silt	38.1917	-90.1333	28750	670	-19.5	Panno et al., 2004	32906	787.5	unnamed unit	Michigan Subepisode	empty	cave	062901-1	ISGS	OK	Panno/Wang	31989	33564	1	0.682745	31357	34091	1367	0.954539	1
ISGS-6211	La Salle	Wedron	wood	41.4187	-88.7817	28670	380	-23.9	Fox et al., 2015	32808	573.5	Peddicord Tongue, Equality Fm	Michigan Subepisode	empty	proglacial lake		ISGS	OK		32178	33325	1	0.682775	31651	33635	992	0.95466	1
OxA-V-2022-17	St. Clair	MNK-3, Collinsville	wood	38.6444	-90.0144	28620	150	ND	Curry and Grimley, 2006	32755	287.5	Equality Fm beyond Wedron	Farmdale Phase		slackwater lake	MNK-3; 27.4 m	ISGS	OK	Curry	32425	33000	1	0.682762	32006	33252	623	0.954636	1
UCIAMS-153753	Mason	Smith Lake	wood	40.1484	-89.8136	28510	200	ND	unpublished	32610	380	Robein Mbr (Roxana Silt) beyond Wedron Group	Farmdale Phase	empty	kettle/soil	Smith Lake 1125	ISGS	OK	Curry	32115	32875	1	0.683127	31734	33162	714	0.954604	1
ISGS-1246	Henderson	Biggsville	bryophytes	40.8528	-90.8798	28470	390	-28.7	Baker et al., 1989	32534	571	Robein Mbr (Roxana Silt) beyond Wedron Group	Farmdale Phase (min)	empty	soil		Hallberg	OK	Hallberg	31818	32960	1	0.682709	31483	33472	994.5	0.954544	1
ISGS-1883	Menard	Athens Quarry, North	humic acid	40.019	-89.7129	28440	310	-27.3	Curry and Follmer, 1992	32471	491.5	Robein Mbr (Roxana Silt) beyond Wedron Group	Farmdale Phase (min)	empty	soil		ISGS	OK	Curry/Follmer	31869	32852	1	0.682979	31532	33305	886.5	0.954527	1
ISGS-5916	Kendall	Fox Ridge Landfill (proposed)	peat	41.5798	-88.5229	28250	190	-27.9	unpublished	32020	353	Robein Mbr (Roxana Silt) below Wedron Group	Farmdale Phase (min)	empty	soil	B-6-05,SS-20B, 76'-78'	ISGS	OK	Fallon	31737	32443	1	0.682754	31525	32766	620.5	0.95456	1
ISGS-1880	Menard	Athens Quarry, North	whole soil	40.019	-89.7129	28240	460	-28.1	Curry and Follmer, 1992	32013	589.5	Robein Mbr (Roxana Silt) beyond Wedron Group	Farmdale Phase (min)	empty	soil		ISGS	OK	Curry/Follmer	31546	32725	1	0.682982	31270	33385	1057.5	0.954613	1
ISGS-1861	Menard	Athens Quarry, North	whole soil	40.019	-89.7129	28190	460	-28.6	Curry and Follmer, 1992	31900	581.5	Robein Mbr (Roxana Silt) beyond Wedron Group	Farmdale Phase (min)	empty	soil		ISGS	OK	Curry/Follmer	31504	32667	1	0.682995	31238	33341	1051.5	0.954525	1
ISGS-1799	Kane	LaFarge Pit	wood	41.8522	-88.4786	28180	1000	-24.9	Curry et al., 1999	31892	983	Inclusion of Robein Mbr in Tiskilwa Fm	Farmdale Phase	empty	soil		ISGS	OK	Curry	31271	33237	1	0.682741	30729	34476	1873.5	0.9545	1
ISGS-4134	Madison	Keller Farm, Glen Carbon	Py-R of SOC	38.7484	-90.0028	28140	850	-25.6	unpublished	31808	866.5	Peoria Silt	Michigan Subepisode	empty	soil organic carbon	KF-C-3	ISGS	Questionable Date	Wang	31289	33022	1	0.682823	30882	34007	1562.5	0.954519	1
ISGS-1879	Menard	Athens Quarry, North	whole soil	40.019	-89.7129	28090	470	-28.2	Curry and Follmer, 1992	31738	574	Robein Mbr (Roxana Silt) beyond Wedron Group	Farmdale Phase (min)	empty	soil		ISGS	OK	Curry/Follmer	31419	32567	1	0.682828	31166	33268	1051	0.954572	1
ISGS-4090	St Clair	O'Fallon	organic silt	38.5833	-89.9333	28090	520	-26.2	unpublished	31738	614.5	lower Peoria	Michigan Subepisode	empty	age too old compared to other dates in area	OFL-1-14.8	ISGS	Questionable Date	Grimley	31398	32627	1	0.682996	31141	33371	1115	0.954558	1
Beta-4129	Henderson	Biggsville	peat, wood	40.8528	-90.8798	27870	420	ND	Baker et al., 1989	31530	493.5	Robein Mbr (Roxana Silt) beyond Wedron Group	Farmdale Phase (min)	empty	soil		Hallberg	OK	Hallberg	31256	32243	1	0.683073	31071	32911	920	0.954554	1
ISGS-1878	Menard	Athens Quarry, North	whole soil	40.019	-89.7129	27770	450	-27	Curry and Follmer, 1992	31462	498	Robein Mbr (Roxana Silt) beyond Wedron Group	Farmdale Phase (min)	empty	soil		ISGS	OK	Curry/Follmer	31172	32168	1	0.683136	30995	32901	953	0.954588	1
ISGS-535	Tazewell	Farm Creek, classic	wood	40.6786	-89.4908	27700	770	ND	Liu and Colemen, 1981; Follmer et al., 1979	31418	780.5	Robein Mbr (Roxana Silt) below Wedron Group	Farmdale Phase (min)	empty	soil		ISGS	OK		31040	32601	1	0.682697	30654	33666	1506	0.954521	1
ISGS-6150	Peoria	Chilecothe	wood	40.9709	-89.5142	27690	380	-23.9	unpublished	31412	390	Robein Mbr (Roxana Silt) below Wedron Group	Farmdale Phase (min)	empty	soil	Site 3C	ISGS	OK	Stumpf	31140	31920	1	0.683092	31005	32640	817.5	0.954633	1
ISGS-1247	Henderson	Biggsville	peat, wood	40.8528	-90.8798	27630	800	-25.8	Baker et al., 1989	31376	809.5	Robein Mbr (Roxana Silt) beyond Wedron Group	Farmdale Phase (min)	empty	soil		Hallberg	OK	Hallberg	30983	32602	1	0.682758	30503	33705	1601	0.954546	1
ISGS-1472	Henderson	Biggsville	organic silt	40.85	-90.8833	27630	650	-28.2	Baker et al., 1989	31376	667	Robein Mbr (Roxana Silt) beyond Wedron Group	Farmdale Phase (min)	empty	soil	BGB2-3	Hallberg	OK	Hallberg	31032	32366	1	0.682941	30736	33357	1310.5	0.954575	1
ISGS-4092	Monroe	Fogelpole Cave	Py-V of SOC	38.1917	-90.1333	27530	590	-17.7	Panno et al., 2004	31320	592.5	unnamed unit	Michigan Subepisode	empty	cave	F98-B, volatile	ISGS	OK	Panno/Wang	30972	32157	1	0.682693	30693	33115	1211	0.954578	1
ISGS-6	Whiteside	McAllister School	peat	41.77	-89.921	27500	500	ND	Kim and Ruch, 1969	31306	474	Robein Mbr (Roxana Silt) below Wedron Group	Farmdale Phase (min)	empty	soil		ISGS	OK		30980	31928	1	0.68291	30774	32802	1014	0.954585	1
W-868	Madison	Peters loess section	terrestrial snail shells	38.733	-90	27500	900	ND	Rubin and Alexander, 1960	31306	922	Peoria Silt beyond Wedron Group	Farmdale Phase (min)	empty	soil		USGS	OK		30833	32677	1	0.682771	30020	33795	1887.5	0.954512	1
ISGS-4093	Monroe	Fogelpole Cave	Py-R of SOC	38.1917	-90.1333	27350	760	-18.3	Panno et al., 2004	31225	784	unnamed unit	Michigan Subepisode	empty	cave	F98C-Residue	ISGS	OK	Panno/Wang	30766	32334	1	0.682763	30148	33486	1669	0.954516	1
ISGS-1897	Menard	Athens Quarry, North	whole soil	40.019	-89.7129	27330	290	-28.9	Curry and Follmer, 1992	31215	182	Robein Mbr (Roxana Silt) beyond Wedron Group	Farmdale Phase (min)	empty	soil		ISGS	OK	Curry/Follmer	31046	31410	1	0.683572	30852	31714	431	0.954578	1
ISGS-614	Bureau	Malden South	wood	41.3931	-89.3583	27300	540	ND	Liu and Coleman, 1981	31200	471.5	Robein Mbr (Roxana Silt) below Wedron Group	Farmdale Phase (min)	empty	soil		ISGS	OK		30827	31770	1	0.682972	30523	32786	1131.5	0.954508	1
ISGS-1296	Kane	Hampshire; F-4	organic silt	42.0439	-88.5127	27250	340	-28.6	Curry, 1989	31173	212.5	Robein Mbr (Roxana Silt) below Wedron Group	Farmdale Phase (min)	empty	soil		ISGS	OK	Curry	30981	31406	1	0.683247	30747	31801	527	0.954603	1
ISGS-661	Tazewell	Pekin Sewer	wood	40.5497	-89.5933	27230	420	-25.8	Liu and Coleman, 1981	31164	288	Robein Mbr (Roxana Silt) below Wedron Group	Farmdale Phase (min)	empty	soil		ISGS	OK		30903	31479	1	0.682817	30625	32219	797	0.954519	1
I-2220	McLean	LeRoy boring 4	organic silt	40.347	-88.7655	27200	950	ND	Kempton and Gross, 1971	31148	1040	Robein Mbr (Roxana Silt) below Wedron Group	Farmdale Phase (max)	empty	soil		ISGS	OK		30467	32547	1	0.682864	29541	33642	2050.5	0.954521	1
ISGS-24	Jo Davies	Stockton NE Core 2	organic silt	42.402	-89.936	27200	400	ND	Kim, 1970	31148	262	Robein Mbr (Roxana Silt) below Wedron Group	Farmdale Phase (min)	empty	soil		ISGS	OK		30908	31432	1	0.683139	30617	32043	713	0.954514	1
ISGS-5327	Peoria	Peoria (borehole)	wood	40.8653	-89.615	26940	190	-27.7	unpublished	31031	122	Robein Mbr (Roxana Silt) below Wedron Group	Farmdale Phase (max)	empty	soil	SPBY-1	ISGS	OK	Stumpf	30904	31148	1	0.683173	30771	31263	246	0.954526	1
I-1625	Kane	NIPC-13	organic silt, peat	42.1145	-88.4639	26900	1450	ND	Kempton and Gross, 1971	31014	1600	Robein Mbr (Roxana Silt) below Wedron Group	Farmdale Phase	empty	soil		ISGS	OK		29550	32750	1	0.682697	28381	34677	3148	0.954511	1
ISGS-93	Coles	Oakland	organic silt	39.662	-88.058	26900	1100	ND	Coleman, 1973	31014	1233.5	Robein Mbr (Roxana Silt) below Wedron Group	Farmdale Phase	empty	soil		ISGS	OK		29768	32235	1	0.682824	28955	33691	2368	0.954512	1
ISGS-1113	Kane	Woodland Landfill	organic silt	41.9827	-88.2709	26890	400	-29	Wickham et al., 1988	31010	255.5	Robein Mbr (Roxana Silt) below Wedron Group	Farmdale Phase	empty	soil		ISGS	OK		30738	31249	1	0.68335	30281	31580	649.5	0.954541	1
ISGS-6652	St Clair	Millstadt	organic silt	38.4814	-90.0531	26850	140	-27.1	unpublished	30992	105.5	Robein Mbr (Roxana Silt) beyond Wedron Group	Farmdale Phase	empty	soil	MST-3-15.	ISGS	OK	Grimley	30876	31087	1	0.683497	30764	31183	209.5	0.954551	1
ISGS-1635	Henderson	Lomax	degraded wood	40.6945	-91.0385	26840	470	-28.9	Curry, 1998	30987	338.5	Robein Mbr (Roxana Silt) beyond Wedron Group	Farmdale Phase	empty	soil	1.9 m below top of Robein	ISGS	OK	Curry	30619	31296	1	0.683008	29888	31709	910.5	0.954564	1
ISGS-561	Stephenson	Stubbe Farm	peat	42.471	-89.78	26820	200	ND	Liu and Coleman, 1981; Whittecar and Davis, 1982	30980	129.5	Henry Formation	Farmdale Phase	empty	soil		ISGS	OK		30835	31094	1	0.683922	30692	31216	262	0.954723	1
W-871	La Salle	Wedron Quarry	wood	41.42	-88.78	26800	700	ND	Rubin and Alexander, 1960	30972	678	Peddicord Tongue, Equality Fm	Farmdale Phase	empty	soil		USGS	OK		30163	31519	1	0.6828	29450	32608	1579	0.954519	1
ISGS-4398	Logan	Lincoln Quarry	wood	40.1333	-89.45	26790	310	-25.6	unpublished	30967	193	Robein Mbr (Roxana Silt) beyond Wedron Group	Farmdale Phase	empty	soil	LQ-20	ISGS	OK	Curry	30751	31137	1	0.682886	30453	31337	442	0.954529	1
ISGS-5881	Woodford	Metamora	organic silt	40.8	-89.3912	26730	270	-25.6	unpublished	30934	173	Robein Mbr (Roxana Silt) below Wedron Group	Farmdale Phase	empty	soil	S-1	ISGS	OK	Stumpf	30742	31088	1	0.68313	30486	31256	385	0.954608	1
ISGS-5824	Woodford	Metamora	organic debris	40.8167	-89.3833	26700	320	-26.9	unpublished	30917	214.5	Robein Mbr (Roxana Silt) below Wedron Group	Farmdale Phase	empty	soil	AJS-01-05	ISGS	OK	Stumpf	30679	31108	1	0.683296	30307	31301	497	0.954648	1
ISGS-533	Tazewell	Farm Creek, classic	wood	40.6786	-89.4908	26680	380	ND	Liu and Colemen, 1981; Follmer et al., 1979	30906	274	Robein Mbr (Roxana Silt) below Wedron Group	Farmdale Phase	empty	soil		ISGS	OK		30595	31143	1	0.683357	30051	31375	662	0.954528	1
ISGS-6382	McHenry	Pleasant Vall Cons Dist (Union)	peat	42.2286	-88.478	26640	160	-27.3	unpublished	30875	121.5	Robein Mbr (Roxana Silt) below Wedron Group	Farmdale Phase	empty	soil	PVAL-01	ISGS	OK	Thomason	30754	30997	1	0.682758	30613	31106	246.5	0.954653	1
ISGS-1593	Kane	Elburn S-30	peat	41.8979	-88.4923	26610	390	-29	Curry, 1989	30858	303	Robein Mbr (Roxana Silt) below Wedron Group	Farmdale Phase	empty	soil		ISGS	OK	Curry	30508	31114	1	0.683233	29916	31317	700.5	0.954635	1
ISGS-1250	Henderson	Biggsville	wood	40.8528	-90.8798	26580	610	-26.1	Baker et al., 1989	30842	553	Robein Mbr (Roxana Silt) beyond Wedron Group	Farmdale Phase	empty	soil		Hallberg	OK	Hallberg	30133	31239	1	0.682989	29345	31808	1231.5	0.954556	1
ISGS-1458	Henderson	Biggsville	organic silt	40.85	-90.8833	26550	500	-27.1	Baker et al., 1989	30822	432	Robein Mbr (Roxana Silt) beyond Wedron Group	Farmdale Phase	empty	soil	BGC-2	Hallberg	OK	Hallberg	30282	31146	1	0.68295	29597	31416	909.5	0.954568	1
I-2218	Woodford	Sixmile Creek Testhole	organic silt	40.6506	-89.0532	26500	950	ND	Kempton and Gross, 1971	30791	950.5	Robein Mbr (Roxana Silt) below Wedron Group	Farmdale Phase	empty	soil		ISGS	OK		29516	31417	1	0.682757	28741	32925	2092	0.954516	1
ISGS-2925	Woodford	Richland Creek section	humic acid	40.875	-89.35	26450	360	-25.6	Hansel and Johnson, 1996	30764	319.5	Robein beyond Wedron	Michigan Subepisode	empty	humic acid from paleosol	RC4	ISGS	Questionable Date	Grimley	30374	31013	1	0.682709	29822	31181	679.5	0.954663	1
ISGS-2943	Mason	Smith Lake	wood	40.1417	-89.8125	26340	220	-28.3	Hansel and Johnson, 1996	30691	221	Equality Formation beyond Wedron Group	Farmdale Phase	empty	kettle	Smith 1108	ISM	OK	Curry	30429	30871	1	0.683629	30048	31026	489	0.954522	1
ISGS-30	Jo Davies	Stockton NE Core 2	organic silt	42.402	-89.936	26300	400	ND	Kim, 1970	30658	403	Robein Mbr (Roxana Silt) below Wedron Group	Farmdale Phase	empty	soil		ISGS	OK		30150	30956	1	0.682966	29610	31122	756	0.954666	1
ISGS-2097	Kane	Virgil	wood	41.9753	-88.5278	26300	2000	-26.4	Hansel and Johnson, 1996	30658	2227.5	Robein Mbr (Roxana Silt) below Wedron Group	Farmdale Phase	empty	soil	KCM-15	ISGS	OK	Trask	28481	32936	1	0.682736	27078	37061	4991.5	0.954511	1
ISGS-4144	Madison	Keller Farm, Glen Carbon	Py-R of SOC	38.7484	-90.0028	26260	400	-25.9	Wang et al. 2003b	30625	414	Peoria Silt	Michigan Subepisode	empty	soil organic carbon	KF-C-12; 12.75	ISGS	Questionable Date	Wang	30091	30919	1	0.683065	29577	31098	760.5	0.95457	1
W-642	Tazewell	East Bureau Creek	wood	41.387	-89.365	26200	800	ND	Rubin and Alexander, 1960	30570	748.5	Robein Mbr (Roxana Silt) beyond Wedron Group	Farmdale Phase	empty	soil		USGS	OK		29551	31048	1	0.682909	28643	31907	1632	0.954508	1
ISGS-476	Rock Island	Airport West	organic silt	41.437	-90.527	26180	760	ND	Liu and Coleman, 1981	30552	711	Robein Mbr (Roxana Silt) beyond Wedron Group	Farmdale Phase	empty	soil		ISGS	OK		29587	31009	1	0.683036	28695	31678	1491.5	0.954521	1
ISGS-6553	Marshall	Senachwine Creek west of Hopewell	wood	40.9829	-89.5057	26180	230	-26.3	unpublished	30552	279	Robein Mbr (Roxana Silt) below Wedron Group	Farmdale Phase	empty	soil	1593	ISGSA	OK	Stumpf	30224	30782	1	0.682826	29807	30920	556.5	0.954574	1
ISGS-5325	Monroe	Fogelpole Cave	organic silt	38.1917	-90.1333	26180	300	-21.6	Panno et al., 2004	30552	349	unnamed unit	Michigan Subepisode	empty	cave		ISGS	OK	Panno/Wang	30122	30820	1	0.682989	29683	30975	646	0.954693	1
ISGS-1866	Menard	Athens Quarry, North	wood	40.0142	-89.7044	26160	320	-28.4	Curry and Follmer, 1992	30535	371.5	Peoria Silt beyond Wedron Group	Farmdale Phase	empty	soil	7-7-87,LRF-87-MA-1	ISGS	OK	Curry/Follmer	30059	30802	1	0.682923	29630	30978	674	0.954608	1
W-406	McLean	Danvers	wood	40.5862	-89.2447	26150	700	ND	Rubin and Alexander, 1960	30523	659.5	Robein Mbr (Roxana Silt) below Wedron Group	Farmdale Phase	empty	soil		USGS	OK		29635	30954	1	0.683042	28818	31440	1311	0.954566	1
ISGS-662	Tazewell	Pekin Sewer	wood	40.5497	-89.5933	26100	170	-25.6	Liu and Coleman, 1981	30464	247	Robein Mbr (Roxana Silt) below Wedron Group	Farmdale Phase	empty	soil		ISGS	OK		30199	30693	1	0.683109	29833	30816	491.5	0.954605	1
I-1964	Peoria	Peoria County, No. 2	organic silt	40.5833	-89.8	26100	900	ND	Buckley et al., 1968	30464	852	Robein Mbr (Roxana Silt) beyond Wedron Group	Farmdale Phase	empty	soil	12.9-15.4 ft; context not clear; location generalized, same as above	ISGS	OK		29360	31064	1	0.68272	28417	32235	1909	0.954515	1
ISGS-2294	Montgomery	Bald Knob Basin	organic silty clay	39.2097	-89.2847	26090	710	-26.9	Curry, 1995	30451	672.5	Equality above Glasford	Michigan Subepisode	empty	gyttja	From core 200 to 210cm interval	ISGS	Questionable Date	Curry	29574	30919	1	0.682714	28766	31405	1319.5	0.954531	1
ISGS-575	Madison	Troy Auger	muck, wood	38.6933	-89.9017	26050	330	ND	Liu and Coleman, 1981	30406	396	Robein Mbr (Roxana Silt) beyond Wedron Group	Farmdale Phase	empty	soil		ISGS	OK		29902	30694	1	0.682697	29515	30921	703	0.954587	1
ISGS-594	Madison	Pleasant Grove	organic carbon concentrated from clay	38.6928	-90.0072	26050	370	ND	Liu and Coleman, 1981	30406	424.5	Robein beyond Wedron	Michigan Subepisode	empty	organic carbon concentrate		ISGS	Questionable Date		29863	30712	1	0.683206	29453	30964	755.5	0.954604	1
ISGS-2602	McHenry	Hebron	wood	42.4913	-88.4633	26030	450	-24.8	Curry and Pavich, 1994	30380	483	Robein Mbr (Roxana Silt) below Wedron Group	Farmdale Phase	empty	soil		ISGS	OK	Curry	29768	30734	1	0.682784	29280	31038	879	0.95461	1
ISGS-529	Tazewell	Gardena	wood	40.6711	-89.4816	25960	280	ND	Liu and Colemen, 1981; Follmer et al., 1979	30284	370.5	Robein Mbr (Roxana Silt) below Wedron Group	Farmdale Phase	empty	soil		ISGS	OK		29841	30582	1	0.682795	29510	30815	652.5	0.954574	1
ISGS-31	La Salle	Wedron Quarry	wood	41.434	-88.813	25900	500	ND	Kim, 1970	30207	537	Tiskilwa Formation_reworked Robein	Farmdale Phase	empty	soil		ISGS	OK		29591	30665	1	0.68276	29041	31004	981.5	0.954505	1
ISGS-6210	La Salle	Wedron	wood	41.4187	-88.7817	25900	220	-24.4	Fox et al., 2015	30207	329.5	Peddicord Tongue, Equality Fm	Michigan Subepisode	empty	proglacial lake		ISGS	OK		29807	30466	1	0.682954	29543	30711	584	0.954597	1
ISGS-3993	Madison	Keller Farm, Glen Carbon	Py-R of SOC	38.7484	-90.0028	25890	330	-25.2	Wang et al. 2003b	30200	414	Peoria Silt	Farmdale Phase	empty	soil organic carbon	K-18; rerun; 4.3-4.4	ISGS	Questionable Date	Wang	29714	30542	1	0.68317	29362	30838	738	0.954561	1
W-333	Bureau	East Bureau Creek	wood	41.387	-89.365	25700	800	ND	Rubin and Alexander, 1958	29820	796	Robein Mbr (Roxana Silt) below Wedron Group	Farmdale Phase	empty	soil		USGS	OK		29116	30708	1	0.682804	28289	31294	1502.5	0.95454	1
ISGS-530	Tazewell	Gardena	wood	40.6711	-89.4816	25680	1000	ND	Liu and Colemen, 1981; Follmer et al., 1979	29787	964.5	Morton Silt	Michigan Subepisode	empty	date dissimilar to other ages from unit		ISGS	Questionable Date		28894	30823	1	0.682956	27815	31837	2011	0.954539	1
ISGS-1602	Vermilion	Armstrong	organic silt	40.2986	-87.8911	25670	960	-25.2	Hansel and Johnson, 1996	29765	930	Robein Mbr (Roxana Silt) below Wedron Group	Farmdale Phase	empty	soil	3.8-4.07	ISGS	OK	Stanke	28927	30787	1	0.682942	27860	31643	1891.5	0.954504	1
ISGS-4924	Monroe	Fogelpole Cave	organic silt	38.1917	-90.1333	25640	360	-21	Panno et al., 2004	29706	466	unnamed unit	Michigan Subepisode	empty	cave	062901-2	ISGS	OK	Panno/Wang	29391	30323	1	0.682776	28999	30707	854	0.954593	1
I-849	McHenry	NIPC-8	organic silt, peat	42.3854	-88.5237	25600	800	ND	Hansel and Johnson, 1992	29673	808.5	Robein Mbr (Roxana Silt) below Wedron Group	Farmdale Phase	empty	soil		ISGS	OK	Kempton	29007	30624	1	0.682843	28204	31212	1504	0.95455	1
ISGS-3843	Madison	Keller Farm, Glen Carbon	Py-R of SOC	38.7484	-90.0028	25590	410	-24.8	Wang et al. 2003b	29661	518.5	Peoria Silt	Michigan Subepisode	empty	soil organic carbon	9.85; Keller Farm PyR	ISGS	Questionable Date	Wang	29285	30322	1	0.683152	28875	30728	926.5	0.954612	1
W-853	Fulton	Buckheart Strip Mine	wood	40.5167	-90	25500	600	ND	Rubin and Alexander, 1960	29579	675	Robein Mbr (Roxana Silt) beyond Wedron Group	Farmdale Phase	empty	soil		USGS	OK		29012	30362	1	0.682923	28531	30916	1192.5	0.954527	1
ISGS-21	Macon	Niantic Basin	peat	39.839	-89.153	25500	600	ND	Kim, 1970	29579	675	Robein Member beyond Wedron	Farmdale Phase	empty	soil		ISGS	OK	Lineback	29012	30362	1	0.682923	28531	30916	1192.5	0.954527	1
ISGS-6212	La Salle	Wedron	wood	41.4187	-88.7817	25490	160	-23.4	Fox et al., 2015	29570	237	Peddicord Tongue, Equality Fm	Michigan Subepisode	empty	proglacial lake		ISGS	OK		29346	29820	1	0.682905	29152	30186	517	0.954525	1
ISGS-531	Tazewell	Gardena	wood	40.6711	-89.4816	25370	310	ND	Liu and Colemen, 1981; Follmer et al., 1979	29440	414	Morton Tongue, Peoria Silt	Farmdale Phase	empty	soil		ISGS	OK		29017	29845	1	0.6832	28770	30366	798	0.95455	1
UCIAMS-150514	McHenry	Bryn Mawr IWLP, Woodstock	wood	42.2586	-88.4067	25330	180	ND	unpublished	29404	241.5	Barlina Moraine; Bryn Mawr IWLP	Farmdale Phase	empty	reworked wood in IWLP	MRAP3-14-20 RC 90-100	MRAP	OK	Curry	29138	29621	1	0.683143	28895	29922	513.5	0.954521	1
ISGS-5305	Kane	Elgin Quad	wood	42.0223	-88.331	25300	360	-28.2	Curry, 2007	29368	452.5	Robein Mbr (Roxana Silt) below Wedron Group	Farmdale Phase (max)	empty	soil	API 34533	ISGS	OK		28903	29808	1	0.682988	28652	30411	879.5	0.95452	1
I-1624	McHenry	NIPC-5	organic silt, peat	42.175	-88.3353	25300	1100	ND	Kempton and Gross, 1971	29368	1082	Robein Mbr (Roxana Silt) below Wedron Group	Farmdale Phase (max)	empty	soil	166-167.5 depth	ISGS	OK		28499	30663	1	0.682799	27481	31760	2139.5	0.954512	1
ISGS-1041	McDonough	McKee Farm	organic silt	40.5191	-90.6755	25269	280	-28	Liu et al., 1986	29339	347.5	Robein Mbr (Roxana Silt) beyond Wedron Group	Farmdale Phase (max)	empty	soil	McKee Farm; MF-1	ISGS	OK	King	28960	29655	1	0.683014	28723	30176	726.5	0.954584	1
ISGS-3467	Menard	Athens Quarry North	wood	40.0167	-89.7083	25260	290	-26.5	unpublished	29328	357	Robein Mbr (Roxana Silt) beyond Wedron Group	Farmdale Phase (max)	empty	soil	spruce wood	ISM	OK	Curry/Follmer	28941	29655	1	0.682875	28704	30192	744	0.954629	1
ISGS-6213	La Salle	Wedron	wood	41.4187	-88.7817	25260	190	-25.3	Fox et al., 2015	29328	241.5	Peddicord Tongue, Equality Fm	Michigan Subepisode	empty	proglacial lake		ISGS	OK		29055	29538	1	0.683015	28822	29818	498	0.954607	1
ISGS-4148	Madison	Keller Farm, Glen Carbon	Py-R of SOC	38.7484	-90.0028	25250	310	-27.4	Wang et al. 2003b	29310	378.5	Peoria Silt	Michigan Subepisode	empty	soil organic carbon	KF-D-11; 13.55	ISGS	Questionable Date	Wang	28911	29668	1	0.683066	28671	30233	781	0.954625	1
ISGS-6157	Piatt	North of Allerton, Mahomet	peat	40.1592	-88.4747	25240	160	-27.7	unpublished	29297	209.5	Robein Mbr (Roxana Silt) below Wedron Group	Farmdale Phase (max)	empty	soil	Piatt 2007-02A	ISGS	OK	Dey	29070	29489	1	0.682803	28867	29705	419	0.954724	1
ISGS-127	Kane	NIPC	organic silt	42.125	-88.355	25230	570	ND	Coleman, 1974; Curry, 1989	29285	663	Robein Mbr (Roxana Silt) below Wedron Group	Farmdale Phase (max)	empty	soil		ISGS	OK		28710	30036	1	0.682761	28269	30737	1234	0.954526	1
ISGS-1459	Henderson	Biggsville	peat	40.85	-90.8833	25180	460	-28.2	Baker et al., 1989	29220	540.5	Robein Mbr (Roxana Silt) beyond Wedron Group	Farmdale Phase (max)	empty	soil	BGB2-2	Hallberg	OK	Hallberg	28717	29798	1	0.682819	28382	30536	1077	0.954547	1
ISGS-686	Coles	Ashmore	organic silt	39.4881	-88.022	25170	150	-27.8	Liu et al., 1986	29219	198	Robein Mbr (Roxana Silt) below Wedron Group	Farmdale Phase (max)	empty	soil	DAA-19; 33.5 m	ISGS	OK		29011	29407	1	0.682829	28827	29592	382.5	0.954714	1
ISGS-536	Menard	Athens Quarry North	wood, needles, organic silt	40.0123	-89.7046	25170	200	ND	Liu and Colemen, 1981; Follmer et al., 1979	29219	241.5	Robein Mbr (Roxana Silt) beyond Wedron Group	Farmdale Phase (max)	empty	soil		ISGS	OK	Curry/Follmer	28966	29449	1	0.683342	28743	29706	481.5	0.954629	1
ISGS-4096	Madison	Keller Farm, Glen Carbon	Py-R of SOC	38.7484	-90.0028	25170	210	-26.7	Wang et al. 2003b	29219	251	Peoria Silt	Michigan Subepisode	empty	soil organic carbon	5.35; Keller Farm PyR	ISGS	Questionable Date	Wang	28956	29458	1	0.683542	28727	29735	504	0.954575	1
ISGS-5876	Woodford	Black Partridge Park, Metamora	wood	40.8	-89.3912	25150	480	-26.6	unpublished	29200	560	Robein Mbr (Roxana Silt) below Wedron Group	Farmdale Phase (max)	empty	soil	Wood-1	ISGS	OK	Stumpf	28678	29798	1	0.683064	28311	30551	1120	0.954608	1
ISGS-3981	Madison	Keller Farm, Glen Carbon	Py-R of SOC	38.7484	-90.0028	25140	280	-25.1	Wang et al. 2003b	29185	318	Peoria Silt	Michigan Subepisode	empty	soil organic carbon	10.75; Keller Farm PyR	ISGS	Questionable Date	Wang	28859	29495	1	0.683371	28585	29953	684	0.954599	1
ISGS-3029	Menard	Athens Quarry North	wood	40.019	-89.7129	25110	280	-25.7	Curry and Follmer, 1992	29128	313	Peoria Silt beyond Wedron Group	Farmdale Phase (max)	empty	soil		ISGS	OK	Curry/Follmer	28837	29463	1	0.68279	28557	29895	669	0.954506	1
ISGS-2165	Kane	Hettrick Farm	wood	41.676	-88.2854	25110	310	-24.7	Hansel and Johnson, 1996	29128	345.5	Peddicord Tongue, Equality Fm	Michigan Subepisode	empty	proglacial lake	F-6	ISGS	OK	Curry	28806	29497	1	0.682868	28517	30038	760.5	0.954596	1
W-69	Tazewell	Farm Creek	wood	40.6787	-89.4909	25100	800	ND	Suess, 1954	29113	866.5	Robein Mbr (Roxana Silt) below Wedron Group	Farmdale Phase (max)	empty	soil		USGS	OK		28464	30197	1	0.682906	27833	30880	1523.5	0.954595	1
ISGS-6216	La Salle	Wedron	wood	41.4187	-88.7817	25100	140	-26	Fox et al., 2015	29113	190.5	Peddicord Tongue, Equality Fm	Michigan Subepisode	empty	proglacial lake		ISGS	OK		28947	29328	1	0.682894	28787	29509	361	0.95471	1
OxA-V-2016-35	St. Clair	MNK-3, Collinsville	wood	38.6444	-90.0144	25070	170	ND	Curry and Grimley, 2006	29072	213	Equality Fm beyond Wedron	Farmdale Phase		slackwater lake	MNK-3; 22.7 m	ISGS	OK	Curry	28894	29320	1	0.682937	28721	29525	402	0.954629	1
ISGS-1474	Henderson	Biggsville	peat	40.85	-90.8833	25060	350	-27.8	Baker et al., 1989	29060	384	Robein Mbr (Roxana Silt) beyond Wedron Group	Farmdale Phase (max)	empty	soil	BGB2-1	Hallberg	OK	Hallberg	28731	29499	1	0.682799	28408	30125	858.5	0.954578	1
UCIAMS-46836	La Salle	Wedron	needle	41.4196	-88.7845	25010	150	ND	Fox et al., 2015	29008	196	Peddicord Tongue, Equality Fm	Michigan Subepisode	empty	proglacial lake	FOP 2008, Stop 2	ISGS	OK		28844	29236	1	0.68284	28700	29445	372.5	0.954812	1
W-292	Madison	Mississippi River outwash	wood	38.736	-90.1378	25000	800	ND	Rubin and Alexander, 1958	28998	873	Henry Formation beyond Wedron	Farmdale Phase (max)	empty	soil		ISGS	OK		28310	30056	1	0.682902	27773	30827	1527	0.95452	1
ISGS-1337	La Salle	Wedron	wood	41.425	-88.7806	25000	890	-25.8	Hansel and Johnson, 1996	28998	942	Robein Mbr (Roxana Silt) below Wedron Group	Farmdale Phase (max)	empty	soil	Pit 6	ISGS	OK	Hansel	28277	30161	1	0.682809	27684	30965	1640.5	0.954546	1
ISGS-61	Grundy	Morris North	wood	41.38	-88.421	24990	280	ND	Coleman, 1973	28987	303.5	Robein Mbr (Roxana Silt) beyond Wedron Group	Farmdale Phase (max)	empty	soil		ISGS	OK		28742	29349	1	0.683408	28456	29715	629.5	0.954513	1
ISGS-4104	Madison	Keller Farm, Glen Carbon	Py-R of SOC	38.7484	-90.0028	24990	220	-26.5	unpublished	28987	249.5	Peoria Silt	Michigan Subepisode	empty	soil organic carbon	K-45; 4.9-5.0	ISGS	Questionable Date	Wang	28783	29282	1	0.682748	28584	29551	483.5	0.954679	1
ISGS-122	Cass	Cass A	wood	40	-90.267	24980	420	ND	Coleman, 1974	28980	464	Robein Mbr (Roxana Silt) beyond Wedron Group	Farmdale Phase (max)	empty	soil		ISGS	OK		28597	29525	1	0.682721	28170	30221	1025.5	0.95454	1
UCIAMS-23774	DeKalb	Burlington IWLP	wood	42.036	-88.6054	24950	150	ND	Curry 2008; Curry et al., 2010	28940	191	DeKalb Mounds IWLP	Farmdale Phase	empty	reworked wood in IWLP	Robein wood redeposited in IWLP silts	ISGS	OK	Curry	28783	29165	1	0.683523	28650	29396	373	0.954681	1
ISGS-862	La Salle	Wedron Quarry; W9-E1	wood	41.4225	-88.7804	24900	200	-26.2	Liu et al., 1986	28899	228.5	Robein Mbr (Roxana Silt) below Wedron Group	Farmdale Phase (max)	empty	soil		ISGS	OK	Barnhardt	28710	29167	1	0.683291	28536	29441	452.5	0.954727	1
ISGS-3954	Kane	Route 34 and Hill	wood	41.7189	-88.2825	24870	140	-25.7	Hansel and Johnson, 1996	28869	170	Peddicord Tongue, Equality Fm	Michigan Subepisode	empty	proglacial lake	S-20	ISGS	OK	Curry	28717	29057	1	0.683422	28582	29299	358.5	0.954565	1
ISGS-4661	Monroe	Fogelpole Cave	Py-R of SOC	38.1917	-90.1333	24850	480	-20.3	Panno et al., 2004	28857	534.5	unnamed unit	Michigan Subepisode	empty	cave	G1-D-Residual	ISGS	OK	Panno/Wang	28406	29475	1	0.682784	27928	30178	1125	0.954607	1
ISGS-1039	Winnebago	Oak Crest Bog;	peat	42.3329	-88.9819	24830	350	-29.6	Liu et al., 1986; Berg et al., 1985	28839	382.5	Grayslake above Glasford	Farmdale Phase (max)	empty	soil	Site 1, RCB-WB-18,19; 2.89-3.05	ISGS	OK	Berg	28532	29297	1	0.683158	28097	29716	809.5	0.954537	1
ISGS-2601	McHenry	Hebron	wood	42.4913	-88.4633	24780	360	-26.7	Curry and Pavich, 1994	28800	397	Robein Mbr (Roxana Silt) below Wedron Group	Farmdale Phase (max)	empty	soil		ISGS	OK	Curry	28463	29257	1	0.683039	28024	29667	821.5	0.95453	1
ISGS-1720	Henderson	Lomax	wood	40.6945	-91.0385	24720	320	-28.6	Curry, 1998	28753	355	Robein Mbr (Roxana Silt) beyond Wedron Group	Farmdale Phase (max)	empty	soil	1.5 m below top of Robein	ISGS	OK	Curry	28422	29132	1	0.683063	28065	29505	720	0.954563	1
W-379	McLean	Danvers	wood	40.5862	-89.2447	24700	1000	ND	Rubin and Alexander, 1958	28738	1011	Robein Mbr (Roxana Silt) below Wedron Group	Farmdale Phase (max)	empty	soil		USGS	OK		27819	29841	1	0.682908	27314	31030	1858	0.954504	1
UCIAMS-115223	McHenry	Marengo Moraine outwash plain	wood	42.3406	-88.6281	24680	210	ND	unpublished	28724	226.5	Robein Mbr (Roxana Silt) below Wedron Group	Farmdale Phase (max)	empty	soil	GAR 70.4-70.55 Robein	ISGS	OK	Thomason	28491	28944	1	0.682786	28247	29248	500.5	0.954509	1
ISGS-3982	Kane	LaFarge sand and gravel, Elburn	wood	41.8522	-88.4786	24670	220	-25.1	Curry et al., 1999	28711	238	Inclusion of Robein Mbr in Tiskilwa Fm	Marengo Phase (max)	empty	soil inclusion in diamicton		ISGS	OK	Curry	28470	28946	1	0.683235	28210	29258	524	0.954524	1
ISGS-4747	Madison	Keller Farm, Glen Carbon	Py-R of SOC	38.7484	-90.0028	24650	280	-25	Wang et al. 2003b	28697	308.5	Peoria Silt	Michigan Subepisode	empty	soil organic carbon	KF-E-8-Residue	ISGS	Questionable Date	Wang	28382	28999	1	0.683192	28069	29359	645	0.954558	1
ISGS-102	Sangamon	Sangamon R., B-9	organic silt	39.825	-89.525	24640	430	ND	Coleman, 1973	28690	474.5	Equality Formation beyond Wedron Group	Farmdale Phase (max)	empty	soil		ISGS	OK		28212	29161	1	0.683172	27813	29661	924	0.954586	1
I-2785	McLean	ISGS-3-67	organic silt	40.2972	-88.6543	24600	750	ND	Hansel and Johnson, 1996	28653	772.5	Robein Mbr (Roxana Silt) below Wedron Group	Farmdale Phase (max)	empty	soil		ISGS	OK		27898	29443	1	0.682806	27537	30534	1498.5	0.954536	1
ISGS-94	Coles	Oakland	organic silt	39.662	-88.058	24600	1300	ND	Coleman, 1973	28653	1286	Robein Mbr (Roxana Silt) below Wedron Group	Farmdale Phase (max)	empty	soil		ISGS	OK	Curry	27655	30227	1	0.682841	26365	31765	2700	0.95451	1
ISGS-5802	Grundy	Material Service pit, W of Morris	wood	41.3353	-88.4794	24590	350	-27.7	unpublished	28645	385.5	Robein Mbr (Roxana Silt) beyond Wedron Group	Farmdale Phase (max)	empty	soil	MTS-25:5.20-5.40	Hajic	OK	Hajic	28232	29003	1	0.682964	27902	29415	756.5	0.954605	1
ISGS-1478	Henderson	Biggsville	wood	40.85	-90.8833	24540	410	-25.7	Baker et al., 1989	28605	440	Robein Mbr (Roxana Silt) beyond Wedron Group	Farmdale Phase (max)	empty	soil	BGA2-2	Hallberg	OK	Hallberg	28111	28991	1	0.682878	27795	29484	844.5	0.9545	1
ISGS-4757	Madison	Keller Farm, Glen Carbon	Py-R of SOC	38.7484	-90.0028	24500	330	-24.8	Wang et al. 2003b	28570	355	Peoria Silt	Michigan Subepisode	empty	soil organic carbon	KF-E-5-Residue	ISGS	Questionable Date	Wang	28158	28868	1	0.68332	27856	29266	705	0.954541	1
ISGS-90	Menard	Fancy Prairie	wood	39.992	-89.61	24450	280	ND	Coleman, 1973	28520	300	Robein Mbr (Roxana Silt) beyond Wedron Group	Farmdale Phase (max)	empty	soil		ISGS	OK		28170	28770	1	0.682908	27869	29071	601	0.954523	1
ISGS-3834	Madison	Keller Farm, Glen Carbon	Py-R of SOC	38.7484	-90.0028	24430	270	-26.7	Wang et al. 2003b	28502	289.5	Peoria Silt	Michigan Subepisode	empty	soil organic carbon	5.95; Keller Farm PyR	ISGS	Questionable Date	Wang	28164	28743	1	0.683351	27869	29017	574	0.954548	1
ISGS-6149	Peoria	Senachwine Creek near Chillecothe	wood	40.9709	-89.5142	24420	410	-21.1	unpublished	28497	416	Robein Mbr (Roxana Silt) below Wedron Group	Farmdale Phase (max)	empty	soil	Site 4	ISGS	OK	Stumpf	28004	28836	1	0.682771	27736	29362	813	0.954636	1
ISGS-863	La Salle	Wedron Quarry; W9-D1	wood	41.4225	-88.7804	24370	310	-26.1	Liu et al., 1986	28440	320	Robein Mbr (Roxana Silt) below Wedron Group	Farmdale Phase (max)	empty	soil		ISGS	OK	Barnhardt	28068	28708	1	0.683249	27789	29036	623.5	0.954652	1
ISGS-3907	Madison	Keller Farm, Glen Carbon	Py-R of SOC	38.7484	-90.0028	24370	320	-25.5	Wang et al. 2003b	28440	328.5	Peoria Silt	Michigan Subepisode	empty	soil organic carbon	8.05; Keller Farm PyR	ISGS	Questionable Date	Wang	28057	28714	1	0.683315	27778	29062	642	0.954645	1
ISGS-1830	Kane	LaFarge Pit	wood	41.8522	-88.4786	24360	430	-25.7	Curry et al., 1999	28429	421.5	Robein Mbr (Roxana Silt) beyond Wedron Group	Marengo Phase (max)	empty	soil inclusion in diamicton		ISGS	OK	Curry	27944	28787	1	0.683109	27684	29352	834	0.954582	1
ISGS-3878	Madison	Keller Farm, Glen Carbon	organic silt	38.75	-90	24340	360	-25.9	Wang et al. 2003b	28408	357.5	Peoria Silt	Michigan Subepisode	empty	soil organic carbon	KF 46 greater than 2 micron	ISGS	Questionable Date	Wang	27996	28711	1	0.68287	27728	29137	704.5	0.954603	1
ISGS-A-0303	St. Clair	MNK-3, Collinsville	wood	38.6444	-90.0144	24310	230	ND	Curry and Grimley, 2006	28364	254	Equality Fm beyond Wedron	Farmdale Phase		slackwater lake	MNK-3; 21.7 m	ISGS	OK	Curry	28091	28599	1	0.683282	27856	28794	469	0.954551	1
ISGS-5651	Putnam	I-1081 (Nauman Farm)	wood	41.1096	-89.3022	24260	760	-29.4	McKay et al., 2008	28301	730.5	Peddicord Tongue, Equality Fm	Michigan Subepisode	empty	slackwater		ISGS	OK	McKay	27666	29127	1	0.682772	27214	30332	1559	0.954567	1
ISGS-53	Fayette	Pittsburg Basin	gyttja	38.904	-89.1898	24200	1900	ND	Coleman, 1972; Grüger, 1972	28240	2018	Equality Formation	Michigan Subepisode	empty	gyttja		ISGS	Questionable Date		26719	30755	1	0.682789	25135	34207	4536	0.954507	1
ISGS-65	Fayette	Pittsburg Basin	gyttja	38.904	-89.1898	24200	800	ND	Coleman, 1973	28240	768.5	Equality Formation	Michigan Subepisode	empty	gyttja		ISGS	Questionable Date		27597	29134	1	0.682793	27093	30408	1657.5	0.954562	1
I-1963	Peoria	Peoria County, No. 1	leaves, stems	40.5833	-89.8	24100	600	ND	Buckley et al., 1968	28100	537	Robein Mbr (Roxana Silt) below Wedron Group	Farmdale Phase	empty	soil	11.5-12.5 ft depth; context not clear; location generalized	ISGS	OK		27675	28749	1	0.682951	27267	29578	1155.5	0.954501	1
ISGS-3827	Madison	Keller Farm, Glen Carbon	organic silt	38.7484	-90.0028	24090	280	-24.8	Wang et al. 2003b	28087	274.5	Peoria Silt	Michigan Subepisode	empty	soil organic carbon	KF-16; 4.1-4.2	ISGS	Questionable Date	Wang	27861	28410	1	0.682812	27692	28699	503.5	0.954667	1
Beta-2939	Henderson	Biggsville	wood	40.8528	-90.8798	24040	250	ND	Baker et al., 1989	28037	250.5	Equality Formation beyond Wedron Group	Farmdale Phase (max)	empty	soil		Hallberg	OK		27839	28340	1	0.682696	27692	28619	463.5	0.954536	1
Beta-2939	Henderson	Biggsville	wood	40.8528	-90.8798	24040	250	ND	Baker et al., 1989	28037	250.5	Peoria Silt	Michigan Subepisode	empty	soil	5.31 - 5.36	Hallberg	OK	Hallberg	27839	28340	1	0.682696	27692	28619	463.5	0.954536	1
W-79	La Salle	Wedron	wood	41.42	-88.78	24000	700	ND	Suess, 1954	27996	638	Robein Mbr (Roxana Silt) below Wedron Group	Farmdale Phase (max)	empty	soil		USGS	OK		27523	28799	1	0.683029	26953	29876	1461.5	0.954506	1
ISGS-2305	Jackson	Happy Hollow/Grand Tower	wood	37.6869	-89.4861	23970	430	-25.2	Hansel and Johnson, 1996	27966	376.5	Robein Mbr (Roxana Silt) beyond Wedron Group	Farmdale Phase	empty	soil	WH3-3	ISGS	OK	McDonald	27708	28461	1	0.683318	27412	28916	752	0.954554	1
ISGS-307	St. Clair	Ruby Lane	organic silt	38.599	-89.996	23930	280	ND	Liu and Coleman, 1981	27933	263	Peoria Silt beyond Wedron Group	Farmdale Phase	empty	soil		ISGS	OK		27747	28273	1	0.683598	27588	28596	504	0.954554	1
ISGS-12	McLean	Danvers	wood	40.583	-89.244	23900	200	ND	Kim, 1970	27909	198	Robein Mbr (Roxana Silt) below Wedron Group	Farmdale Phase	empty	soil		ISGS	OK		27756	28152	1	0.683076	27640	28431	395.5	0.954596	1
ISGS-1611	Bureau	Warren Miller Farm	organic silt	41.2567	-89.8256	23900	1500	-28.3	Hansel and Johnson, 1996	27909	1575.5	Robein Mbr (Roxana Silt) beyond Wedron Group	Farmdale Phase	empty	soil	About 650 cm below ground surface	ISGS	OK		26660	29811	1	0.682778	25475	31938	3231.5	0.954516	1
ISGS-4649	Monroe	Fogelpole Cave	Py-V of SOC	38.1917	-90.1333	23770	700	-30.9	Panno et al., 2004	27822	638.5	unnamed unit	Michigan Subepisode	empty	cave	G1-B & C, Volatile	ISGS	OK	Panno/Wang	27368	28645	1	0.682964	26600	29521	1460.5	0.954509	1
ISGS-4648	Monroe	Fogelpole Cave	Py-R of SOC	38.1917	-90.1333	23760	720	-25.1	Panno et al., 2004	27814	662.5	unnamed unit	Michigan Subepisode	empty	cave	G1-A, Residual	ISGS	OK	Panno/Wang	27341	28666	1	0.682874	26546	29568	1511	0.954505	1
I-2784	Ogle	Esmond	organic silt	42.0558	-88.9602	23750	1000	ND	Frye et al., 1969	27808	1014.5	Peoria Silt	Michigan Subepisode	empty	soil organic carbon; contaminated?		ISGS	Questionable Date		27037	29066	1	0.682878	26145	30353	2104	0.954561	1
ISGS-5632	Kane	Bluff City quarry, top of Robein	wood	42.0136	-88.2424	24000	270	-25	Curry, 2015	27801	163.5	Robein Mbr (Roxana Silt) below Wedron Group	Marengo Phase (max)	empty	soil		ISGS	OK		27996	28323	1	0.683339	27648	28625	488.5	0.95457	1
ISGS-2113	Clark	Martinsville LLW site	wood	39.3764	-87.8778	23720	300	-29.7	Curry et al., 1997	27792	260.5	Henry Formation beyond Wedron	Farmdale Phase	empty	soil		ISGS	OK	Curry	27577	28098	1	0.68306	27402	28467	532.5	0.954523	1
ISGS-2108	Kane	LaFarge sand and gravel, Elburn	wood	41.8522	-88.4786	23710	320	-25.2	Curry et al., 1999	27786	277	Inclusion of Robein Mbr in Tiskilwa Fm	Marengo Phase (max)	empty	soil inclusion in diamicton		ISGS	OK	Curry	27558	28112	1	0.682939	27375	28500	562.5	0.954624	1
W-849	Fulton	Buckheart Strip Mine	wood	40.5167	-90	23700	550	ND	Rubin and Alexander, 1960	27775	483	Robein Mbr (Roxana Silt) beyond Wedron Group	Farmdale Phase	empty	soil		USGS	OK		27426	28392	1	0.682865	26917	29062	1072.5	0.954506	1
ISGS-6028	Champaign	Mahomet, sand and gravel pit	organic silt	40.19	-88.4126	23580	170	-26.3	unpublished	27706	127.5	Robein Mbr (Roxana Silt) below Wedron Group	Farmdale Phase	empty	soil	MHMT-06-01	ISGS	OK	Stumpf	27579	27834	1	0.682751	27435	27985	275	0.954644	1
ISGS-3028	Menard	Athens Quarry North	wood	40.019	-89.7129	23560	300	-26.4	Hansel and Johnson, 1996	27696	234	Peoria Silt beyond Wedron Group	Michigan Subepisode	empty	loess		ISGS	OK	Curry/Follmer	27465	27933	1	0.683313	27272	28332	530	0.954629	1
ISGS-3942	Madison	Keller Farm, Glen Carbon	Py-R of SOC	38.7484	-90.0028	23510	330	-24.6	Wang et al. 2003b	27668	256	Peoria Silt	Michigan Subepisode	empty	soil organic carbon	9.25; Keller Farm PyR	ISGS	Questionable Date	Wang	27412	27924	1	0.683352	27178	28357	589.5	0.954654	1
W-745	Fulton	Enion	stems, twigs	40.4	-90.1166	23500	400	ND	Wang et al. 2003b	27663	330	Peoria Silt beyond Wedron Group	Michigan Subepisode	empty	loess		USGS	OK		27350	28010	1	0.682887	27052	28530	739	0.954505	1
ISGS-95	Gallatin	Little Cypress Ditch	charcoal bearing silt	37.73	-88.248	23500	960	ND	Coleman, 1973	27663	973	Equality Formation beyond Wedron Group	Michigan Subepisode	empty	slackwater	>200 mesh	ISGS	Questionable Date	Frye	26758	28704	1	0.682856	25948	29978	2015	0.954504	1
ISGS-5130	Putnam	I-1081 (Nauman Farm)	plant debris	41.1096	-89.3022	23460	260	-25.2	unpublished	27640	184.5	Equality Formation beyond Wedron Group	Michigan Subepisode	empty	slackwater	126.0-126.1ft	ISGS	OK	McKay	27445	27814	1	0.682751	27233	28092	429.5	0.954634	1
ISGS-851	Scott	Smiling Dan	wood, bark, seeds, needles	39.6861	-90.5599	23380	500	-26.6	Liu et al., 1992	27590	449	Robein Mbr (Roxana Silt) below Wedron Group	Shelby Phase	empty	soil		ISGS	OK		27148	28046	1	0.682796	26603	28593	995	0.954544	1
ISGS-A3596	Scott	Thomas Quarry	Succinea sp.	39.5218	-90.5153	23300	130	ND	Nash, 2016; Nash et al., 2017	27540	108	Peoria Silt	Michigan Subepisode	empty	loess	TQA-3.6	MRAP	OK	Grimley/Nash/Conroy	27433	27649	1	0.683713	27322	27753	215.5	0.954922	1
ISGS-3021	McHenry	Wedgewood	organic silt	42.2222	-88.3533	23230	550	-27.2	Curry et al., 1997	27501	524	Equality between Tisk and Bev Tongue	Michigan Subepisode	empty	slackwater/kettle	Wedgewood #1	ISGS	Questionable Date	Hansel	26923	27971	1	0.682972	26349	28553	1102	0.954509	1
ISGS-1552	Henderson	Biggsville	wood and peat	40.85	-90.8833	23230	710	-24.5	Baker et al., 1989	27501	704.5	Robein Mbr (Roxana Silt) beyond Wedron Group	Shelby Phase	empty	soil	BGB1-2	Hallberg	OK	Hallberg	26691	28100	1	0.682775	26060	28856	1398	0.954539	1
ISGS-A3595	Scott	Thomas Quarry	Succinea sp.	39.5218	-90.5153	23170	120	ND	Nash, 2016; Nash et al., 2017	27459	110	Peoria Silt	Michigan Subepisode	empty	loess	TQA-2.9	MRAP	OK	Grimley/Nash/Conroy	27349	27569	1	0.683743	27225	27678	226.5	0.954712	1
ISGS-5355	Peoria	Singing Woods NP	wood	40.865	-89.5983	23140	610	-25.6	unpublished	27438	589.5	Equality Formation beyond Wedron Group	Shelby Phase	empty	soil	SPBY-2	ISGS	OK	Stumpf	26709	27888	1	0.682963	26154	28549	1197.5	0.954564	1
ISGS-413	Madison	Sugarloaf Road Core	wood, organic silt	38.7161	-89.997	23110	800	ND	Liu and Coleman, 1981	27416	784.5	Peoria Silt beyond Wedron Group	Shelby Phase	empty	soil		ISGS	OK		26484	28053	1	0.682858	25866	28999	1566.5	0.954559	1
ISGS-3822	Madison	Keller Farm, Glen Carbon	organic silt	38.7484	-90.0028	23030	250	-24.9	unpublished	27365	215	Peoria Silt	Michigan Subepisode	empty	soil organic carbon	KF-18; 4.3-4.4	ISGS	Questionable Date	Wang	27134	27564	1	0.682975	26767	27740	486.5	0.954687	1
ISGS-1469	Madison	Nochta sand pit	organic silt	38.7167	-90.0194	23000	2300	-25.7	Hansel and Johnson, 1996	27343	2720	Peoria Silt beyond Wedron Group	Farmdale Phase	empty	soil	Nochta sand pit	Hallberg	OK	Rissing	25080	30520	1	0.682692	22725	35833	6554	0.954506	1
I-2783	Cook	NIPC 19	organic silt, peat	42.093	-88.1801	23000	2030	ND	Kempton and Hackett, 1968	27343	2296	Robein Mbr (Roxana Silt) below Wedron Group	Shelby Phase	empty	soil	175-176.5 ft depth	ISGS	OK		25284	29876	1	0.682742	23428	33778	5175	0.954503	1
ISGS-1232	Henderson	Biggsville	wood	40.8528	-90.8798	22980	200	-25.3	Baker et al., 1989	27332	179	Robein Mbr (Roxana Silt) beyond Wedron Group	Shelby Phase	empty	soil		UofIowa	OK	Hallberg	27135	27493	1	0.682908	26844	27668	412	0.954527	1
ISGS-6849	McHenry	Huntley, Aquatic Center	wood	42.1624	-88.4357	22920	370	-27	unpublished	27287	363.5	Morton Tongue, Peoria Silt	Shelby Phase	empty	soil	Hunt-08-01	ISGS	OK	Thomason	26847	27574	1	0.683136	26390	27797	703.5	0.954558	1
W-68	Tazewell	Farm Creek	wood	40.6787	-89.4909	22900	900	ND	Suess, 1954	27274	855.5	Morton Tongue, Peoria Silt	Shelby Phase	empty	soil		USGS	OK		26174	27885	1	0.682898	25539	29137	1799	0.954545	1
ISGS-422	Piatt	Monticello Pit	organic silt	40.039	-88.582	22850	290	ND	Liu and Coleman, 1981	27240	304.5	Robein Mbr (Roxana Silt) below Wedron Group	Farmdale Phase	empty	soil		ISGS	OK	Johnson/King	26863	27472	1	0.682866	26496	27656	580	0.954529	1
ISGS-3709	Henderson	Lomax	wood	40.695	-91.0389	22830	280	-25.1	Curry, 1998	27223	299.5	Equality Formation beyond Wedron Group	Farmdale Phase	empty	soil	Lomax Monolith 4.2m	ISGS	OK	Curry	26850	27449	1	0.682939	26494	27631	568.5	0.954647	1
ISGS-4147	Madison	Keller Farm, Glen Carbon	Py-V of SOC	38.7484	-90.0028	22810	230	-23.8	Wang et al. 2003b	27210	257.5	Peoria Silt	Michigan Subepisode	empty	soil organic carbon	KF-D-11; 13.55	ISGS	Questionable Date	Wang	26900	27415	1	0.683195	26558	27549	495.5	0.954682	1
ISGS-3819	Madison	Keller Farm, Glen Carbon	organic silt	38.7484	-90.0028	22800	210	-24.7	unpublished	27198	240.5	Peoria Silt	Farmdale Phase	empty	soil organic carbon	KF-35. 6.0-6.1m	ISGS	Questionable Date	Wang	26918	27399	1	0.682897	26582	27516	467	0.954616	1
ISGS-99	Sangamon	Sugar Ck	organic silt	39.792	-89.55	22700	110	ND	Coleman, 1973	27107	179.5	Equality Formation beyond Wedron Group	Shelby Phase	empty	soil	B-8	ISGS	OK		26902	27261	1	0.683708	26649	27351	351	0.954696	1
ISGS-1604	Pope	Waltersburg	organic silt	37.3802	88.5923	22650	440	-29.5	Hansel and Johnson, 1996	27046	441.5	Equality Formation beyond Wedron Group	Michigan Subepisode	empty	slackwater	About 7.7 m below ground surface	ISGS	OK		26496	27379	1	0.683069	26065	27671	803	0.954609	1
ISGS-4927	Monroe	Fogelpole Cave	organic silt	38.1917	-90.1333	22640	260	-22.2	Panno et al., 2004	27035	305	unnamed unit	Michigan Subepisode	empty	cave	062901-3	ISGS	OK	Panno/Wang	26647	27257	1	0.682843	26325	27466	570.5	0.954531	1
Beta-3258	Henderson	Biggsville	peat, wood	40.8528	-90.8798	22570	160	ND	Baker et al., 1989	26948	229	Robein Mbr (Roxana Silt) beyond Wedron Group	Farmdale Phase	empty	soil		Hallberg	OK	Hallberg	26662	27120	1	0.68301	26457	27301	422	0.954653	1
ISGS-4133	Madison	Keller Farm, Glen Carbon	Py-V of SOC	38.7484	-90.0028	22550	360	-24.5	unpublished	26920	391.5	Peoria Silt	Hudson Episode	empty	soil organic carbon	KF-C-3	ISGS	Questionable Date	Wang	26467	27250	1	0.68319	26093	27499	703	0.954592	1
ISGS-7044	Cass	New Cottonwood School	Py-R of TOC	40.0236	-90.2906	22540	300	-26.4	unpublished	26909	346	Peoria Silt (Jules Geosol)	Michigan Subepisode	empty	soil organic carbon		MRAP	Questionable Date	Wang	26506	27198	1	0.68275	26163	27424	630.5	0.954571	1
ISGS-4746	Madison	Keller Farm, Glen Carbon	Py-V of SOC	38.7484	-90.0028	22510	370	-23.7	Wang et al. 2003b	26846	402.5	Peoria Silt	Hudson Episode	empty	soil organic carbon	KE-E-8-Volatile	ISGS	Questionable Date	Wang	26415	27220	1	0.682904	26055	27484	714.5	0.954678	1
UCIAMS-153752	Mason	Smith Lake	wood	40.1484	-89.8136	22460	100	ND	unpublished	26758	190	Equality Formation beyond Wedron Group	Michigan Subepisode	empty	kettle	Smith Lake 1044	ISGS	OK	Curry	26592	26972	1	0.683144	26439	27131	346	0.954726	1
I-2518	McLean	Normal	wood	40.5261	-88.9516	22450	500	ND	Kempton and Gross, 1971	26740	494.5	Robein Mbr (Roxana Silt) below Wedron Group	Farmdale Phase	empty	soil		ISGS	OK		26235	27224	1	0.683063	25863	27633	885	0.954608	1
ISGS-4143	Madison	Keller Farm, Glen Carbon	Py-V of SOC	38.7484	-90.0028	22440	440	-23.9	Wang et al. 2003b	26740	455	Peoria Silt	Hudson Episode	empty	soil organic carbon	KF-C-12; 12.75	ISGS	Questionable Date	Wang	26272	27182	1	0.683275	25928	27532	802	0.954571	1
W-334	Bureau	East Bureau Creek	peat	41.387	-89.365	22450	1000	ND	Rubin and Alexander, 1958	26740	937	Morton Tongue, Peoria Silt	Shelby Phase	empty	loess		USGS	OK		25813	27687	1	0.682925	24673	28910	2118.5	0.954522	1
ISGS-3821	Madison	Keller Farm, Glen Carbon	organic silt	38.7484	-90.0028	22290	230	-24.7	unpublished	26503	315	Peoria Silt	Michigan Subepisode	empty	soil organic carbon	KF-22; 4.7-4.8	ISGS	Questionable Date	Wang	26228	26858	1	0.683489	26054	27147	546.5	0.954523	1
ISGS-125	Lee	EW-Tollway B-64D	wood	41.825	-89.454	22190	960	ND	Coleman, 1974	26400	920	Robein Mbr (Roxana Silt) beyond Wedron Group	Farmdale Phase	empty	soil		ISGS	OK		25641	27481	1	0.682791	24503	28524	2010.5	0.954529	1
ISGS-3736	Christian	South Fork Sangamon River	wood	39.6504	-89.4781	22170	190	-24.2	unpublished	26378	243	Morton Tongue, Peoria Silt	Farmdale Phase (max)	empty	soil	SSA-A-2	Hajic	OK	Hajic	26126	26612	1	0.682881	26001	26980	489.5	0.954673	1
ISGS-534	Menard	Athens Quarry North	wood	40.0123	-89.7046	22170	450	ND	Liu and Colemen, 1981; Follmer et al., 1979	26378	466	Peoria Silt beyond Wedron Group	Michigan Subepisode	empty	loess		ISGS	OK	Curry/Follmer	26018	26950	1	0.68293	25705	27401	848	0.954565	1
ISGS-108	Sangamon	Sangamon R., B-10	organic silt	39.769	-89.55	22150	330	ND	Coleman, 1974; Miller, 1973	26359	373.5	Equality Formation beyond Wedron Group	Michigan Subepisode	empty	slackwater		ISGS	OK		26031	26778	1	0.683066	25847	27200	676.5	0.954661	1
ISGS-3027	Menard	Athens Quarry North	wood	40.019	-89.7129	22120	230	-25.3	Hansel and Johnson, 1996	26290	270	Peoria Silt beyond Wedron Group	Michigan Subepisode	empty	loess		ISGS	OK	Curry/Follmer	26063	26603	1	0.683026	25928	27008	540	0.954675	1
ISGS-107	Sangamon	Sangamon R.	organic silt	39.829	-89.525	22020	300	ND	Coleman, 1974; Miller, 1973	26177	320	Equality Formation beyond Wedron Group	Michigan Subepisode	empty	slackwater	B-36	ISGS	OK		25944	26584	1	0.683028	25775	27063	644	0.954637	1
ISGS-1477	Henderson	Biggsville	organic silt	40.85	-90.8833	22000	920	-25.7	Baker et al., 1989	26159	913	Robein Mbr (Roxana Silt) beyond Wedron Group	Farmdale Phase (max)	empty	soil	BGC-1	Hallberg	OK	Hallberg	25506	27332	1	0.682792	24365	28202	1918.5	0.954546	1
ISGS-3465	Henderson	Lomax	branches	40.6945	-91.0385	21980	220	-24.4	Curry, 1998	26143	231	Robein Mbr (Roxana Silt) beyond Wedron Group	Farmdale Phase (max); diversion	empty	soil	Lomax, 7 cm below top of Robein	ISGS	OK	Curry	25978	26440	1	0.682895	25809	26801	496	0.954557	1
I-2517	De Witt	Farmer City	organic silt	40.2624	-88.6449	21950	500	ND	Kempton and Gross, 1971	26124	519	Robein Mbr (Roxana Silt) below Wedron Group	Farmdale Phase	empty	soil		ISGS	OK		25770	26808	1	0.682708	25356	27355	999.5	0.954533	1
ISGS-2924	Coles	Center School House	wood	39.3964	-88.0819	21950	180	-25	Hansel and Johnson, 1996	26124	190.5	Morton Tongue, Peoria Silt	Shelby Phase	empty	soil	CS-1C	ISGS	OK		25978	26359	1	0.683407	25846	26614	384	0.954731	1
ISGS-294	St. Clair	Ruby Lane	organic silt	38.599	-89.996	21910	270	ND	Liu and Coleman, 1981	26095	272	Peoria Silt beyond Wedron Group	Farmdale Phase	empty	soil		ISGS	OK		25892	26436	1	0.683424	25690	26885	597.5	0.954596	1
ISGS-549	Saline	Barnes Farm	organic silt	37.7833	-88.5625	21780	410	ND	Liu and Coleman, 1981	25998	421	Equality Formation beyond Wedron Group	Michigan Subepisode	empty	Lake Saline		ISGS	OK		25665	26507	1	0.683193	25307	27084	888.5	0.954504	1
ISGS-4756	Madison	Keller Farm, Glen Carbon	Py-V of SOC	38.7484	-90.0028	21760	280	-23.6	Wang et al. 2003b	25984	268.5	Peoria Silt	Michigan Subepisode	empty	soil organic carbon	KF-E-5-Volatile	ISGS	Questionable Date	Wang	25756	26293	1	0.68343	25504	26700	598	0.954554	1
UCIAMS-152229	DeKalb	Schnucks 383-393	leaves, stems	41.9193	-88.7784	21760	140	ND	unpublished	25984	119.5	DeKalb Mounds	Michigan Subepisode	empty	anomolously old compared with other ages	Schnucks 383-393	ISGS	Questionable Date		25871	26110	1	0.682828	25752	26303	275.5	0.954699	1
UCIAMS-152229	DeKalb	Schnucks 383-393	leaves, stems	41.9193	-88.7784	21760	140	ND	unpublished	25984	119.5	DeKalb Mounds IWLP	Michigan Subepisode	empty	DeKalb Mounds	Schnucks 383-393	ISGS	OK		25871	26110	1	0.682828	25752	26303	275.5	0.954699	1
ISGS-A3594	Scott	Thomas Quarry	Succinea sp.	39.5218	-90.5153	21740	100	ND	Nash, 2016; Nash et al., 2017	25973	89.5	Peoria Silt	Michigan Subepisode	empty	loess	TQA-2	MRAP	OK	Grimley/Nash/Conroy	25886	26065	1	0.685206	25794	26168	187	0.954753	1
ISGS-3099	Coles	Center School House	organic silt	39.3964	-88.0819	21680	520	-25.9	Hansel and Johnson, 1996	25931	557.5	Morton Tongue, Peoria Silt	Shelby Phase	empty	loess		ISGS	OK		25445	26560	1	0.68289	24934	27255	1160.5	0.954582	1
ISGS-79	Champaign	Mahomet SW	wood	40.156	-88.439	21670	130	ND	Coleman, 1973	25925	107.5	Robein Mbr (Roxana Silt) below Wedron Group	Farmdale Phase (max)	empty	soil		ISGS	OK		25822	26037	1	0.684354	25697	26157	230	0.954788	1
AA-100659	Henry	IL.122Henry IL	Mammuthus	41.1297	-89.3391	21670	360	-20.1	Widga et al., 2017	25925	357.5	Peddicord Tongue, Equality Fm	Michigan Subepisode	empty	proglacial lake		ISM	OK	Widga	25601	26316	1	0.682845	25236	26844	804	0.954573	1
ISGS-A-0518	Putnam	I-1081 (Nauman Farm)	plant debris	41.1096	-89.3022	21650	100	ND	McKay et al., 2008	25914	88.5	Equality Formation beyond Wedron Group	Michigan Subepisode	empty	slackwater	elev 509	ISGS	OK	McKay	25827	26004	1	0.683677	25734	26097	181.5	0.9549	1
ISGS-A-0145	St. Clair	CAH-8, Cahokia	needles	38.5247	-90.1407	21600	200	ND	Curry and Grimley, 2006	25881	165	Equality Fm beyond Wedron	Michigan Subepisode		slackwater lake	CAH-8; 16.3 m	ISGS	OK	Phillips	25712	26042	1	0.683241	25503	26265	381	0.954582	1
ISGS-6332	St Clair	New Athens	wood	38.3519	-89.8742	21570	160	-25.5	unpublished	25862	132	Peoria Silt beyond Wedron Group	Michigan Subepisode	empty	loess	NAE 6f	ISGS	OK	Grimley	25725	25989	1	0.684163	25566	26124	279	0.954781	1
UCIAMS-156027	Mason	Smith Lake	inflorescence, stalks (grass)	40.1484	-89.8136	21560	100	ND	unpublished	25856	92	Equality Formation beyond Wedron Group	Michigan Subepisode	empty	kettle	Smith Lake 838-842	ISGS	OK	Curry	25761	25945	1	0.685077	25660	26036	188	0.955033	1
ISGS-4128	Madison	Keller Farm, Glen Carbon	Py-R of SOC	38.7484	-90.0028	21530	170	-25.9	Wang et al. 2003b	25834	141.5	Peoria Silt	Farmdale Phase	empty	soil organic carbon	4.25; Keller Farm PyR	ISGS	Questionable Date	Wang	25684	25967	1	0.684109	25510	26113	301.5	0.954612	1
ISGS-A-0517	Putnam	I-1081 (Nauman Farm)	plant debris	41.1096	-89.3022	21500	80	ND	McKay et al., 2008	25814	83	Equality Formation beyond Wedron Group	Michigan Subepisode	empty	slackwater	elev 519	ISGS	OK	McKay	25727	25893	1	0.684592	25635	25974	169.5	0.954596	1
UCIAMS-97039	Lee	Hedge/Cyclone Rds, Paw Paw	Dryas leaves, stems	41.6559	-89.0532	21490	100	ND	unpublished	25806	94.5	Paw Paw Moraine IWLP	Putnam Phase (min)	empty	Paw Paw Moraine	PawPaw 11-01A,B;25.5-26.5	ISGS	OK	Curry	25707	25896	1	0.683112	25601	25989	194	0.954695	1
ISGS-3373	Madison	Pleasant Grove	wood	38.8517	-90.05	21480	200	-26.6	Grimley et al., 1998	25797	169.5	Peoria Silt beyond Wedron Group	Michigan Subepisode	empty	loess	KH#1	ISGS	OK		25616	25955	1	0.682781	25371	26119	374	0.954576	1
ISGS-1303	Rock Island	Coal Creek	wood	41.4427	-90.485	21470	590	-27.1	Hansel and Johnson, 1996	25790	658	Robein Mbr (Roxana Silt) beyond Wedron Group	Farmdale Phase	empty	soil		ISGS	OK		25124	26440	1	0.682907	24459	27134	1337.5	0.954538	1
ISGS-1486	La Salle	Wedron	organic debris	41.4224	-88.7803	21460	470	-29.1	Baker et al., 1989	25782	495.5	Robein Mbr (Roxana Silt) beyond Wedron Group	Farmdale Phase	empty	soil		ISGS	OK		25232	26223	1	0.682858	24595	26858	1131.5	0.954534	1
ISGS-546	Gallatin	Edwards Farm	organic silty clay	37.8503	-88.3067	21460	210	ND	Liu and Coleman, 1981	25782	180.5	Equality Formation beyond Wedron Group	Michigan Subepisode	empty	Lake Saline		ISGS	OK	Heinrich	25589	25950	1	0.68359	25327	26114	393.5	0.954516	1
ISGS-85	Vermilion	Fairmont Quarry	wood	40.003	-87.863	21420	720	ND	Coleman, 1973	25755	820	Robein Mbr (Roxana Silt) below Wedron Group	Farmdale Phase (max)	empty	soil		ISGS	OK		24895	26535	1	0.682833	24197	27318	1560.5	0.954562	1
ISGS-1231	Henderson	Biggsville	peat	40.8528	-90.8798	21410	290	-29.4	Baker et al., 1989	25747	265	Robein Mbr (Roxana Silt) beyond Wedron Group	Farmdale Phase (max)	empty	soil		UofIowa	OK	Hallberg	25451	25981	1	0.683346	25099	26278	589.5	0.954551	1
ISGS-46	Shelby	Shelbyville Dam	wood	39.4087	-88.7821	21400	1000	ND	Coleman, 1972	25740	1106	Robein Mbr (Roxana Silt) below Wedron Group	Farmdale Phase (max)	empty	soil		ISGS	OK		24528	26740	1	0.68287	23581	27804	2111.5	0.954518	1
ISGS-3350	Menard	Athens Quarry North	wood	40.019	-89.7129	21390	220	-24.2	unpublished	25733	197.5	Peoria Silt beyond Wedron Group	Michigan Subepisode	empty	loess	AQ1-TBP-90	ISGS	OK	Curry/Follmer	25516	25911	1	0.683579	25250	26069	409.5	0.954747	1
ISGS-3828	Madison	Keller Farm, Glen Carbon	organic silt	38.7484	-90.0028	21380	180	-25	unpublished	25725	163.5	Peoria Silt	Michigan Subepisode	empty	soil organic carbon	KF-9; paleosol A horizon, 3.5 to 3.6m below surface	ISGS	Questionable Date	Wang	25549	25876	1	0.682738	25317	26008	345.5	0.954794	1
ISGS-47	Fayette	Pittsburg Basin	organic silt	38.904	-89.1898	21370	800	ND	Coleman, 1972; Grüger, 1972	25719	907	Equality Formation	Michigan Subepisode		kettle	J-1; 200-210 cm	ISGS	OK	Jacobs	24677	26491	1	0.682713	24002	27413	1705.5	0.95454	1
ISGS-2484	La Salle	Wedron Pit 7	wood	41.432	-88.7779	21370	240	-23.8	Hansel and Johnson, 1996	25719	218.5	Peddicord Tongue, Equality Fm	Michigan Subepisode	empty	proglacial lake	W7,2S,8	ISGS	OK		25475	25912	1	0.683133	25192	26091	449.5	0.954679	1
ISGS-1123	Piatt	Mansfield Borrow Pit	wood	40.2196	-88.5177	21360	720	-27.3	Hansel and Johnson, 1996	25711	822.5	Robein Mbr (Roxana Silt) below Wedron Group	Farmdale Phase (max)	empty	soil		ISGS	OK		24797	26442	1	0.68269	24128	27269	1570.5	0.954523	1
ISGS-45	Madison	Edwardsville	terrestrial snail shells	38.7694	-90.05	21350	320	ND	Coleman, 1972	25702	301.5	Robein Mbr (Roxana Silt) below Wedron Group	Michigan Subepisode	empty	loess		ISGS	OK		25347	25950	1	0.683115	24920	26323	701.5	0.954515	1
ISGS-5630	Putnam	I-1081 (Nauman Farm)	plant debris	41.1096	-89.3022	21350	200	-29.3	McKay et al., 2008	25702	185.5	Equality Formation beyond Wedron Group	Michigan Subepisode	empty	slackwater	C14-D	ISGS	OK	McKay	25500	25871	1	0.68353	25255	26009	377	0.954632	1
ISGS-3374	Madison	Pleasant Grove	wood	38.8517	-90.05	21340	130	-24.9	Grimley et al., 1998	25694	129	Peoria Silt beyond Wedron Group	Michigan Subepisode	empty	loess	KH#2	ISGS	OK		25558	25816	1	0.68319	25371	25924	276.5	0.954657	1
ISGS-5649	Putnam	I-1081 (Nauman Farm)	plant debris	41.1096	-89.3022	21320	570	-28.2	McKay et al., 2008	25672	639.5	Equality Formation beyond Wedron Group	Michigan Subepisode	empty	slackwater	C-14 B	ISGS	OK	McKay	24933	26212	1	0.682979	24323	26961	1319	0.954559	1
ISGS-28	Coles	Charleston Quarry	wood	39.518	-88.1161	21300	500	ND	Kim, 1970	25657	542	Morton Tongue, Peoria Silt	Farmdale Phase (max)	empty	soil		ISGS	OK		25025	26109	1	0.682904	24370	26705	1167.5	0.954554	1
ISGS-32	Shelby	Shelbyville Dam; Robein top	wood	39.4087	-88.7821	21300	500	ND	Kim, 1970	25657	542	Robein Mbr (Roxana Silt) below Wedron Group	Farmdale Phase (max)	empty	soil		ISGS	OK		25025	26109	1	0.682904	24370	26705	1167.5	0.954554	1
ISGS-1532	Henderson	Biggsville	organic silt	40.8528	-90.8798	21280	420	-28.9	Baker et al., 1989	25641	432.5	Robein Mbr (Roxana Silt) beyond Wedron Group	Farmdale Phase (max)	empty	soil	BGB1-1	Hallberg	OK		25141	26006	1	0.683077	24509	26443	967	0.95455	1
ISGS-1730	Henderson	Lomax	wood and bryophytes	40.6945	-91.0385	21250	250	-29	Curry, 1998	25615	242	Robein Mbr (Roxana Silt) beyond Wedron Group	Farmdale Phase (max); diversion	empty	soil		ISGS	OK	Curry	25338	25822	1	0.682964	25031	26035	502	0.954666	1
ISGS-261	Henderson	Lomax	wood	40.6945	-91.0385	21250	220	ND	Liu and Coleman, 1981; Curry, 1998	25615	216	Robein Mbr (Roxana Silt) beyond Wedron Group	Farmdale Phase (max); diversion	empty	soil		ISGS	OK		25370	25802	1	0.682843	25119	25977	429	0.954594	1
ISGS-727	Macon	TA-6, S-9	wood	39.7861	-88.9831	21250	170	-29.3	Liu et al., 1986	25615	176.5	Morton Tongue, Peoria Silt	Shelby Phase	empty	soil	26.8 m	ISGS	OK	Morse	25422	25775	1	0.683678	25219	25898	339.5	0.954589	1
ISGS-3820	Madison	Keller Farm, Glen Carbon	organic silt	38.7484	-90.0028	21230	190	-24.7	unpublished	25598	194	Peoria Silt	Michigan Subepisode	empty	soil organic carbon	KF-28, paleosol A horizon, 5.26-5.40m below surface	ISGS	Questionable Date	Wang	25379	25767	1	0.683108	25165	25915	375	0.954651	1
UCIAMS-46832	Lake	Lake Barrington Village Hall	leaves, stems	42.21	-88.1728	21200	760	ND	unpublished	25574	849.5	Peddicord Tongue, Equality Fm	Michigan Subepisode	empty	proglacial lake	LBARR 27.65-27.8 .052mgC	ISGS	OK		24506	26205	1	0.68274	23892	27229	1668.5	0.954517	1
Ox-A-12139	St. Clair	MNK-3, Collinsville	Succinea sp.	38.6444	-90.0144	21200	80	ND	Curry and Grimley, 2006	25574	113.5	Equality Fm beyond Wedron	Michigan Subepisode		slackwater lake	MNK-3; 16.6 m	ISGS	OK	Curry	25449	25676	1	0.683598	25294	25758	232	0.954698	1
ISGS-A1651	St Clair	Highbanks Section	Valvata tricarinata	38.4252	-89.7561	21340	140	-8	Grimley and Phillips, 2012	25549	64.5	Equality Formation beyond Wedron Group	Michigan Subepisode	empty	Lake Kaskaskia	20 ft	ISGS	OK	Grimley	25694	25823	1	0.683339	25350	25933	291.5	0.954706	1
ISGS-123	Cass	Cass B	wood	39.9	-90.067	21080	370	ND	Coleman, 1974	25450	412.5	Equality Formation beyond Wedron Group	Michigan Subepisode	empty	slackwater		ISGS	OK		24991	25816	1	0.682829	24444	26057	806.5	0.954569	1
ISGS-3788	Madison	Keller Farm, Glen Carbon	organic silt	38.7484	-90.0028	21060	250	-25.3	unpublished	25421	281	Peoria Silt	Michigan Subepisode	empty	soil organic carbon	KF-35, 6.0-6.1m	ISGS	Questionable Date	Wang	25129	25691	1	0.682767	24670	25878	604	0.954578	1
UCIAMS-157646	Kendall	1850 Wolfs Crossing, Oswego	leaves, stems	41.685	-88.2934	21050	110	-26.3	unpublished	25420	140	Minooka Moraine IWLP	Livingston Phase (min)	empty	Minooka Moraine	OSW_1_518-579	ISGS	Questionable Date	Curry	25268	25548	1	0.68344	25124	25669	272.5	0.954715	1
UCIAMS-157646	Kendall	1850 Wolfs Crossing, Oswego	leaves, stems	41.685	-88.2934	21050	110	-26.3	unpublished	25420	140	Minooka Moraine; down-ice	Michigan Subepisode	empty	anomolously old compared with other ages	OSW_1_518-579	ISGS	Questionable Date		25268	25548	1	0.68344	25124	25669	272.5	0.954715	1
ISGS-3347	Menard	Athens Quarry North	wood	40.019	-89.7129	21020	160	-25	unpublished	25387	189	Peoria Silt beyond Wedron Group	Michigan Subepisode	empty	loess	AQ1-TBP-55	ISGS	OK	Curry/Follmer	25190	25568	1	0.682947	24945	25746	400.5	0.954631	1
ISGS-4571	Monroe	Fogelpole Cave	Py-V of SOC	38.1917	-90.1333	20980	590	-25	Panno et al., 2004	25337	647.5	unnamed unit	Michigan Subepisode	empty	cave	G1-A, Volatile	ISGS	OK	Panno/Wang	24540	25835	1	0.683032	23890	26541	1325.5	0.954535	1
ISGS-A3708	Scott	Thomas Quarry	Succinea sp.	39.5218	-90.5153	20940	90	ND	Nash, 2016; Nash et al., 2017	25293	136	Peoria Silt	Michigan Subepisode	empty	loess	TQB-0.2	MRAP	OK	Grimley/Nash/Conroy	25158	25430	1	0.682715	25024	25556	266	0.954678	1
ISGS-412	Madison	Sugarloaf Road Core	wood, organic silt	38.7161	-89.997	20910	520	ND	Liu and Coleman, 1981	25249	580	Peoria Silt beyond Wedron Group	Farmdale Phase	empty	soil		ISGS	OK		24550	25710	1	0.68304	23949	26221	1136	0.954514	1
ISGS-87	Saline	Big Ridge	peat	37.732	-88.248	20900	140	ND	Coleman, 1973	25236	200	Equality Formation beyond Wedron Group	Michigan Subepisode	empty	Lake Saline		ISGS	OK		25048	25448	1	0.683407	24722	25605	441.5	0.954714	1
ISGS-2981	Menard	Athens Quarry North	wood	40.019	-89.7129	20880	370	-24	Hansel and Johnson, 1996	25210	451.5	Peoria Silt beyond Wedron Group	Michigan Subepisode	empty	loess		ISGS	OK	Curry/Follmer	24675	25578	1	0.682938	24271	25898	813.5	0.954617	1
ISGS-723	Macon	TA-3, S-7	organic silt, wood	39.7336	-89.0172	20870	130	-27.3	Liu et al., 1986	25196	196	Morton Tongue, Peoria Silt	Shelby Phase	empty	soil	20.7 m	ISGS	OK	Morse	25010	25402	1	0.683116	24693	25557	432	0.954668	1
ISGS-A3709	Scott	Thomas Quarry	Succinea sp.	39.5218	-90.5153	20840	90	ND	Nash, 2016; Nash et al., 2017	25166	147.5	Peoria Silt	Michigan Subepisode	empty	loess	TQB-0.6	MRAP	OK	Grimley/Nash/Conroy	25021	25316	1	0.683345	24782	25480	349	0.953261	2
ISGS-2438	Tazewell	Farm Creek	wood	40.6233	-89.4798	20840	250	-25.2	Hansel and Johnson, 1996	25166	351	Morton Tongue, Peoria Silt	Shelby Phase	empty	soil		ISGS	OK		24781	25483	1	0.683343	24447	25689	621	0.954649	1
ISGS-560	Hamilton	Zipp Profile	organic silt	37.9558	-88.4492	20830	160	ND	Liu and Coleman, 1981	25159	251.5	Equality Formation beyond Wedron Group	Michigan Subepisode	empty	Lake Saline		ISGS	OK		24896	25399	1	0.683146	24573	25539	483	0.954692	1
ISGS-2843	Coles	Charleston Quarry	wood	39.5125	-88.1167	20830	190	-26.4	Hansel and Johnson, 1996	25159	290	Morton Tongue, Peoria Silt	Shelby Phase	empty	soil		ISGS	OK		24852	25432	1	0.683444	24529	25583	527	0.954699	1
ISGS-81	Vemilion	Harmattan Strip Mine #4	wood	40.145	-87.727	20800	130	ND	Coleman, 1973; Johnson et al., 1972	25127	217.5	Morton Tongue, Peoria Silt	Shelby Phase	empty	loess		ISGS	OK		24891	25326	1	0.683014	24586	25459	436.5	0.954771	1
ISGS-A-0535	Putnam	I-1081 (Nauman Farm)	wood	41.1096	-89.3022	20780	140	ND	McKay et al., 2008	25101	237.5	Equality Formation beyond Wedron Group	Michigan Subepisode	empty	slackwater	elev 529	ISGS	OK	McKay	24834	25309	1	0.68303	24553	25449	448	0.954529	1
ISGS-110	Menard	Sangamon R., B-7	organic silt	39.944	-89.781	20740	720	ND	Coleman, 1974; Miller, 1973	25056	789.5	Equality Formation beyond Wedron Group	Michigan Subepisode	empty	slackwater		ISGS	OK		24176	25755	1	0.682971	23354	26639	1642.5	0.954547	1
Beta-76811	Cass	Cottonwood Sch.	terrestrial snail shells	40.028	-90.2955	20730	90	ND	Hansel and Johnson, 1996	25043	189	Peoria Silt beyond Wedron Group	Michigan Subepisode	empty	loess		ISGS	OK		24837	25215	1	0.683174	24582	25297	357.5	0.954821	1
ISGS-2555	Jackson	DeSoto	wood	37.8033	-89.2014	20720	440	-25.7	Esling and Blum, 1995	25030	516	Equality Formation beyond Wedron Group	Michigan Subepisode	empty	Lake Muddy	DS-1; 3 km SE of DeSoto	ISGS	OK		24440	25472	1	0.682922	23975	25886	955.5	0.954603	1
ISGS-2048	Tazewell	155/Birchwood, Morton	wood	40.6002	-89.4799	20720	490	-25.2	Hansel and Johnson, 1996	25030	561.5	Morton Tongue, Peoria Silt	Shelby Phase	empty	loess	Getz Borrow Pit	ISGS	OK	Curry	24397	25520	1	0.682947	23862	25976	1057	0.954591	1
ISGS-3980	Madison	Keller Farm, Glen Carbon	Py-V of SOC	38.7484	-90.0028	20710	260	-23.8	Wang et al. 2003b	25017	351.5	Peoria Silt	Michigan Subepisode	empty	soil organic carbon	10.75; Keller Farm PyV	ISGS	Questionable Date	Wang	24563	25266	1	0.683225	24297	25593	648	0.954625	1
W-399	Tazewell	Farm Creek	wood	40.6765	-89.495	20700	650	ND	Rubin and Alexander, 1958	25004	719	Morton Tongue, Peoria Silt	Shelby Phase	empty	soil		ISGS	OK		24214	25652	1	0.682819	23458	26375	1458.5	0.954542	1
ISGS-A3710	Scott	Thomas Quarry	Succinea sp.	39.5218	-90.5153	20670	90	ND	Nash, 2016; Nash et al., 2017	24974	203	Peoria Silt	Michigan Subepisode	empty	loess	TQB-1	MRAP	OK	Grimley/Nash/Conroy	24702	25108	1	0.683661	24533	25233	350	0.954726	1
ISGS-828	De Witt	Clinton Power Plant	moss	40.1691	-88.8389	20670	280	-30.2	Liu et al., 1986	24974	367	Morton Tongue, Peoria Silt	Shelby Phase	empty	soil		ISGS	OK		24513	25247	1	0.682722	24215	25591	688	0.954602	1
ISGS-2919	Coles	Charleston Quarry	organic silt	39.5125	-88.1167	20660	170	-27.4	Hansel and Johnson, 1996	24970	265	Morton Tongue, Peoria Silt	Shelby Phase	empty	soil	HW-94-2	ISGS	OK		24601	25131	1	0.683209	24395	25358	481.5	0.95452	1
ISGS-84	Saline	Big Ridge	wood	37.732	-88.248	20600	220	ND	Coleman, 1973	24854	308	Equality Formation beyond Wedron Group	Michigan Subepisode	empty	Lake Saline		ISGS	OK	Heinrich	24502	25118	1	0.683506	24240	25406	583	0.954551	1
UCIAMS-157639	Coles	Charleston Quarry	a-cellululose	39.518	-88.1161	20590	110	ND	unpublished	24850	208.5	Morton Tongue, Peoria Silt	Shelby Phase	empty	soil		ISGS	OK		24573	24990	1	0.683241	24433	25184	375.5	0.954573	1
UCIAMS-156029	Mason	Smith Lake	inflorescence, stalks (grass)	40.1484	-89.8136	20580	90	ND	unpublished	24844	191	Equality Formation beyond Wedron Group	Michigan Subepisode	empty	kettle	Smith Lake 708-717	ISGS	OK	Curry	24575	24957	1	0.682921	24448	25140	346	0.954774	1
UCIAMS-147633	Cass	Cottonwood School core	terrestrial snail shells	40.0236	-90.2906	20550	140	ND	Nash, 2016; Nash et al., 2017	24640	233	Peoria Silt beyond Wedron Group	Michigan Subepisode	empty	loess	NCSC-19ft	MRAP	OK	Nash/Grimley	24511	24977	1	0.683305	24341	25198	428.5	0.954677	1
NZA32590	Sangamon	IL.39.Clear Lake	Mammuthus	39.8182	-89.5338	20550	100	-20.2	Widga et al., 2017	24640	197	Equality Formation beyond Wedron Group	Michigan Subepisode	empty	slackwater		ISM	OK	Widga	24538	24932	1	0.683724	24400	25125	362.5	0.954746	1
ISGS-A3593	Scott	Thomas Quarry	Succinea sp.	39.5218	-90.5153	20540	90	ND	Nash, 2016; Nash et al., 2017	24640	188	Peoria Silt	Michigan Subepisode	empty	loess	TQA-0.8m	MRAP	OK	Grimley/Nash/Conroy	24533	24909	1	0.684002	24401	25094	346.5	0.954772	1
ISGS-2485	Tazewell	Farm Creek	wood	40.6233	-89.4798	20550	280	-24.9	Hansel and Johnson, 1996	24640	368.5	Morton Tongue, Peoria Silt	Shelby Phase	empty	soil	repeat of ISGS-2438	ISGS	OK		24395	25132	1	0.682789	24079	25477	699	0.954625	1
ISGS-547	Hamilton	Mitchell Farm	organic silty clay	37.958	-88.434	20510	170	ND	Liu and Coleman, 1981	24600	263.5	Equality Formation beyond Wedron Group	Michigan Subepisode	empty	Lake Saline		ISGS	OK	Heinrich	24440	24967	1	0.683406	24240	25217	488.5	0.954682	1
UCIAMS-142907	Tazewell	Farm Creek "Beaver Point"	plant macros	40.6765	-89.495	20510	80	ND	unpublished	24600	179	Morton Tongue, Peoria Silt	Shelby Phase	empty	colluvium		ISGS	OK		24501	24859	1	0.683094	24377	25034	328.5	0.954546	1
ISGS-3346	Menard	Athens Quarry North	wood	40.019	-89.7129	20500	220	-25.1	unpublished	24576	313	Peoria Silt beyond Wedron Group	Michigan Subepisode	empty	loess	AQ-1-TBP-0	ISGS	OK	Curry/Follmer	24387	25013	1	0.683261	24124	25291	583.5	0.954625	1
ISGS-89	Coles	Center School	wood	39.396	-88.0808	20500	130	ND	Coleman, 1973	24576	225.5	Morton Tongue, Peoria Silt	Shelby Phase	empty	loess		ISGS	OK		24459	24910	1	0.683447	24294	25131	418.5	0.954673	1
W-483	McLean	Danvers	moss, peat	40.5862	-89.2447	20500	600	ND	Rubin and Alexander, 1958	24576	688.5	Morton Tongue, Peoria Silt	Shelby Phase	empty	loess		USGS	OK		24036	25413	1	0.682937	23364	26023	1329.5	0.95453	1
ISGS-83	Vemilion	Harmattan Strip Mine #4	wood	40.145	-87.727	20500	210	ND	Coleman, 1973; Johnson et al., 1972	24576	303	Morton Tongue, Peoria Silt	Shelby Phase	empty	loess		ISGS	OK		24396	25002	1	0.682935	24144	25273	564.5	0.954712	1
UCIAMS-155338	Coles	Charleston Quarry	wood	39.518	-88.1161	20480	70	ND	unpublished	24564	170	Morton Tongue, Peoria Silt	Shelby Phase	empty	loess	outer 2 rings of wood stump	ISGS	OK		24459	24799	1	0.683311	24354	24974	310	0.954849	1
ISGS-A1651	St Clair	Highbanks Section	Stagnicola elodes	38.4252	-89.7561	20560	130	-9.1	Grimley and Phillips, 2012	24528	-157	Equality beyond Wedron	Michigan Subepisode	empty	snail with secondary carbonate	10.5 ft	ISGS	Questionable Date	Grimley	24976	24662	1	0.683339	24368	25189	410.5	0.954706	1
ISGS-2923	Coles	Center School House	wood	39.3964	-88.0819	20440	160	-26.8	Hansel and Johnson, 1996	24516	258.5	Morton Tongue, Peoria Silt	Shelby Phase	empty	loess	CS-1B	ISGS	OK		24355	24872	1	0.683095	24163	25127	482	0.954609	1
ISGS-3842	Madison	Keller Farm, Glen Carbon	Py-V of SOC	38.7484	-90.0028	20420	415	-23.9	Wang et al. 2003b	24498	511.5	Peoria Silt	Michigan Subepisode	empty	soil organic carbon	9.85; Keller Farm PyV	ISGS	Questionable Date	Wang	24114	25137	1	0.682882	23672	25617	972.5	0.954567	1
ISGS-2110	Henderson	Lomax	twigs and bryophytes	40.6945	-91.0385	20410	210	-29.1	Curry, 1998	24490	310	Robein Mbr (Roxana Silt) beyond Wedron Group	Farmdale Phase (max); diversion	empty	soil	Lomax, top 0.5 cm, Robein	ISGS	OK	Curry	24280	24900	1	0.68284	24048	25191	571.5	0.954714	1
ISGS-1865	Menard	Athens Quarry, North	wood	40.019	-89.7129	20410	280	-26.9	Curry and Follmer, 1992	24490	379.5	Peoria Silt beyond Wedron Group	Michigan Subepisode	empty	soil		ISGS	OK	Curry/Follmer	24223	24982	1	0.683255	23917	25332	707.5	0.954645	1
ISGS-1721	Fulton	Kearney Cemetery	wood	40.2839	-90.169	20400	190	-26.3	Hansel and Johnson, 1996	24474	290.5	Equality Formation beyond Wedron Group	Farmdale Phase	empty	loess		ISGS	OK	Johnson	24279	24860	1	0.682706	24067	25142	537.5	0.954672	1
ISGS-3462	Henderson	Lomax	twigs and bryophytes	40.6945	-91.0385	20400	300	-27.6	Curry, 1998	24474	400	Robein Mbr (Roxana Silt) beyond Wedron Group	Farmdale Phase (max)	empty	soil	Lomax, top 0.5 cm, Robein	ISGS	OK	Curry	24191	24991	1	0.68328	23868	25371	751.5	0.954533	1
AA-8459	Coles	Center School House	wood	39.3984	-88.0808	20360	110	ND	Hansel and Johnson, 1996	24440	178	Morton Tongue, Peoria Silt	Shelby Phase	empty	loess		ISGS	OK		24257	24613	1	0.683418	24139	24910	385.5	0.954587	1
ISGS-3463	Henderson	Lomax	twigs and bryophytes	40.6945	-91.0385	20340	150	-29.4	Curry, 1998	24420	233	Robein Mbr (Roxana Silt) beyond Wedron Group	Farmdale Phase (max)	empty	soil	Lomax, top 0.5 cm, Robein	ISGS	OK	Curry	24187	24653	1	0.683152	24055	24982	463.5	0.954634	1
W-349	Tazewell	Farm Creek	organic silt	40.6787	-89.4909	20340	750	ND	Rubin and Alexander, 1958	24420	862.5	Morton Tongue, Peoria Silt	Shelby Phase	empty	soil		ISGS	OK		23694	25419	1	0.682917	22818	26192	1687	0.954531	1
UCIAMS-46833	Lake	Lake Barrington Village Hall	leaves, stems	42.21	-88.1728	20320	150	ND	unpublished	24400	222.5	Peddicord Tongue, Equality Fm	Michigan Subepisode	empty	proglacial lake	BARR 16-16.8 .17mgC	ISGS	OK		24166	24611	1	0.683209	24032	24955	461.5	0.95475	1
ISGS-136	Piatt	Sangamon River near Mahomet	wood	40.6922	-91.0417	20320	120	ND	Coleman, 1974; Curry, 1989	24400	175	Robein Mbr (Roxana Silt) beyond Wedron Group	Shelby Phase	empty	soil		ISGS	OK		24214	24564	1	0.683533	24075	24874	399.5	0.954512	1
ISGS-3733	Christian	South Fork Sangamon River	peat	39.6504	-89.4781	20470	170	-25.6	unpublished	24389	186	Robein Mbr (Roxana Silt) beyond Wedron Group	Farmdale Phase	empty	soil	Near liquifaction dike	Hajic	OK	Hajic	24550	24922	1	0.683339	24186	25177	495.5	0.954706	1
W-870	Fulton	Enion North	terrestrial snail shells	40.416	-90.1167	20300	600	ND	Rubin and Alexander, 1960	24380	713	Peoria Silt beyond Wedron Group	Michigan Subepisode	empty	loess		USGS	OK		23799	25225	1	0.683042	23119	25837	1359	0.954516	1
ISGS-2507	Alexander	Olive Branch	organic clay	37.1861	-89.3939	20230	510	-24.6	Rubin and Alexander, 1960	24308	630.5	Peoria Silt beyond Wedron Group	Michigan Subepisode	empty	loess		ISGS	OK		23800	25061	1	0.682957	23229	25643	1207	0.954591	1
UCIAMS-142910	Tazewell	Farm Creek "Horse Hill"	buds and bracts	40.6702	-89.4871	20230	70	ND	unpublished	24308	115	Morton Tongue, Peoria Silt	Shelby Phase (max)	empty	colluvium		ISGS	OK		24187	24417	1	0.683853	24070	24519	224.5	0.954523	1
ISGS-7106	Champaign	Sangamon River	wood	40.1981	-88.3906	20220	140	-24.4	Grimley et al., 2016	24290	176.5	Morton Tongue, Peoria Silt	Shelby Phase (max)	empty	slackwater	MHT-6f-log	ISGS	OK		24112	24465	1	0.682903	23922	24739	408.5	0.954603	1
ISGS-3864	Madison	Keller Farm, Glen Carbon	organic carbon concentrated from clay	38.7484	-90.0028	20180	240	-24.6	unpublished	24255	305.5	Peoria Silt	Michigan Subepisode	empty	soil organic carbon	KF-46; paleosol A horizon, 7.1 to 7.2m below surface	ISGS	Questionable Date	Wang	23942	24553	1	0.683227	23701	25014	656.5	0.954541	1
ISGS-7071	Champaign	Sangamon River	wood	40.1992	-88.3894	20180	130	-23.8	Grimley et al., 2016	24255	162.5	Morton Tongue, Peoria Silt	Shelby Phase (max)	empty	slackwater	DAG-SRB	ISGS	OK		24085	24410	1	0.68319	23906	24579	336.5	0.954626	1
UCIAMS-142909	Tazewell	Farm Creek "Horse Hill"	moss	40.6702	-89.4871	20170	80	ND	unpublished	24243	122	Morton Tongue, Peoria Silt	Shelby Phase (max)	empty	colluvium		ISGS	OK		24114	24358	1	0.684523	23997	24476	239.5	0.954721	1
ISGS-649	Union	Miller's Farm	wood	37.5042	-89.4361	20160	250	ND	Liu and Coleman, 1981	24232	316	Equality Formation beyond Wedron Group	Michigan Subepisode	empty	Lake Saline		ISGS	OK	Heinrich	23913	24545	1	0.683339	23656	25013	678.5	0.954653	1
UCIAMS-142911	Tazewell	Farm Creek "Horse Hill"	caddisfly nest	40.6702	-89.4871	20160	80	ND	unpublished	24232	121.5	Morton Tongue, Peoria Silt	Shelby Phase (max)	empty	colluvium		ISGS	OK		24105	24348	1	0.68331	23986	24466	240	0.954948	1
ISGS-3291	Coles	Charleston Quarry	Py-R of wood	39.5125	-88.1167	20140	150	-25	unpublished	24207	180.5	Morton Tongue, Peoria Silt	Shelby Phase (max)	empty	soil	3290 and 3291 same sample	ISGS	OK		24029	24390	1	0.682893	23821	24588	383.5	0.954521	1
ISGS-2922	Coles	Center School House	wood	39.3964	-88.0819	20090	150	-25.2	Hansel and Johnson, 1996	24159	180.5	Morton Tongue, Peoria Silt	Shelby Phase (max)	empty	loess	CS-1A	ISGS	OK		23979	24340	1	0.684018	23784	24527	371.5	0.954627	1
AA-8458.1	Coles	Center School House	wood	39.3984	-88.0808	20080	110	ND	Hansel and Johnson, 1996	24135	144	Morton Tongue, Peoria Silt	Shelby Phase (max)	empty	loess		ISGS	OK		24004	24292	1	0.684252	23863	24436	286.5	0.954751	1
ISGS-2593	Coles	Charleston Quarry	wood	39.5125	-88.1167	20050	170	-25.3	Hansel and Johnson, 1996	24110	203	Morton Tongue, Peoria Silt	Shelby Phase (max)	empty	soil		ISGS	OK		23917	24323	1	0.683648	23682	24523	420.5	0.954693	1
ISGS-2921	Coles	Center School House	wood	39.3964	-88.0819	20030	150	-25.7	Hansel and Johnson, 1996	24084	183	Morton Tongue, Peoria Silt	Shelby Phase (max)	empty	soil		ISGS	OK		23916	24282	1	0.682887	23714	24462	374	0.954536	1
ISGS-2047	Tazewell	155/Birchwood, Morton	wood	40.6002	-89.4799	20020	230	-26	Hansel and Johnson, 1996	24080	275	Robein Mbr (Roxana Silt) below Wedron Group	Shelby Phase (max)	empty	loess	Getz Borrow Pit	ISGS	OK	Curry	23812	24362	1	0.68332	23496	24710	607	0.954583	1
ISGS-39	Madison	Edwardsville	organic silt	38.7694	-90.05	20000	500	ND	Coleman, 1972	24060	636.5	Robein Mbr (Roxana Silt) below Wedron Group	Shelby Phase (max)	empty	soil		ISGS	OK		23469	24742	1	0.682935	22958	25399	1220.5	0.954518	1
I-2519	Douglas	Observatory Boring 3	organic silt	39.7022	-88.0552	20000	400	ND	Kempton and Gross, 1971	24060	502	Morton Tongue, Peoria Silt	Shelby Phase (max)	empty	soil		ISGS	OK		23548	24552	1	0.683003	23130	25181	1025.5	0.954523	1
ISGS-26	Shelby	Shelbyville Dam; Robein top	wood	39.4087	-88.7821	20000	200	ND	Kim, 1970	24060	239.5	Morton Tongue, Peoria Silt	Shelby Phase (max)	empty	loess		ISGS	OK		23827	24306	1	0.683441	23558	24537	489.5	0.954535	1
ISGS-2842	Coles	Charleston Quarry	wood	39.5125	-88.1167	19980	150	-24.5	Hansel and Johnson, 1996	24043	187.5	Morton Tongue, Peoria Silt	Shelby Phase (max)	empty	soil		ISGS	OK		23857	24232	1	0.68357	23654	24407	376.5	0.954571	1
UCIAMS-147637	Cass	New Cottonwood School	terrestrial snail shells	40.0236	-90.2906	19970	150	ND	Nash, 2016; Nash et al., 2017	24035	188.5	Peoria Silt beyond Wedron Group	Michigan Subepisode	empty	loess	NCSB-13.5ft	MRAP	OK	Nash/Grimley	23845	24222	1	0.683893	23642	24396	377	0.954676	1
UCIAMS-147632	Cass	New Cottonwood School	terrestrial snail shells	40.0236	-90.2906	19960	130	-6.1	Nash, 2016; Nash et al., 2017	24020	169	Peoria Silt beyond Wedron Group	Michigan Subepisode	empty	loess	NCSB-11.4ft	MRAP	OK	Nash/Grimley	23851	24189	1	0.683762	23669	24349	340	0.954615	1
UCIAMS-142908	Tazewell	Farm Creek "Beaver Point"	needle	40.6765	-89.495	19960	70	ND	unpublished	24020	114	Morton Tongue, Peoria Silt	Shelby Phase (max)	empty	loess		ISGS	OK		23903	24131	1	0.68465	23788	24255	233.5	0.954838	1
ISGS-128	Madison	Sunset Hills	peat	38.779	-90.007	19900	130	ND	Coleman, 1974	23959	171.5	Peoria Silt beyond Wedron Group	Michigan Subepisode	empty	soil		ISGS	OK		23775	24118	1	0.683036	23601	24286	342.5	0.954786	1
ISGS-3290	Coles	Charleston Quarry	Py-V of wood	39.5125	-88.1167	19870	150	-23.8	unpublished	23920	190.5	Morton Tongue, Peoria Silt	Michigan Subepisode	empty	thermal treatment of wood	3290 and 3291 same sample	ISGS	Questionable Date		23717	24098	1	0.683037	23535	24292	378.5	0.954705	1
ISGS-A1651	St Clair	Highbanks Section	Pomatiopsis lapidaria	38.4252	-89.7561	20010	120	-6.1	Grimley and Phillips, 2012	23920	167	Equality Formation beyond Wedron Group	Michigan Subepisode	empty	Lake Kaskaskia	16 ft	ISGS	OK	Grimley	24231	24064	1	0.683567	23754	24387	316.5	0.95466	1
ISGS-A3711	Scott	Thomas Quarry	Succinea sp.	39.5218	-90.5153	19850	80	ND	Nash, 2016; Nash et al., 2017	23899	127.5	Peoria Silt	Michigan Subepisode	empty	loess	TQB-1.45	MRAP	OK	Grimley/Nash/Conroy	23769	24024	1	0.683773	23629	24138	254.5	0.954629	1
ISGS-3100	McLean	Danvers	moss	40.5192	-89.2444	19830	190	-27	Hansel and Johnson, 1996	23878	228.5	Morton Tongue, Peoria Silt	Michigan Subepisode	empty	proglacial lake; contaminated?		ISGS	Questionable Date		23634	24091	1	0.683175	23412	24337	462.5	0.954545	1
ISGS-129	Madison	Sunset Hills	peat	38.779	-90.007	19750	500	ND	Coleman, 1974	23790	612.5	Peoria Silt beyond Wedron Group	Michigan Subepisode	empty	loess		ISGS	OK		23141	24366	1	0.682819	22654	25128	1237	0.954593	1
UCIAMS-147631	Cass	New Cottonwood School	terrestrial snail shells	40.0236	-90.2906	19690	130	-5.4	Nash, 2016; Nash et al., 2017	23718	171.5	Peoria Silt beyond Wedron Group	Michigan Subepisode	empty	loess	NCSB-12.4ft	MRAP	OK	Nash/Grimley	23551	23894	1	0.683797	23369	24063	347	0.954615	1
ISGS-532	Tazewell	Farm Creek, Gardena	moss	40.6711	-89.4816	19680	460	ND	Liu and Colemen, 1981; Follmer et al., 1979	23690	600	Morton Tongue, Peoria Silt	Shelby Phase (max)	empty	moss overridden by diamicton		ISGS	Questionable Date	Follmer
ISGS-4132	Madison	Keller Farm, Glen Carbon	organic silt	38.7484	-90.0028	19660	560	-25.7	unpublished	23671	673	Peoria Silt	Michigan Subepisode	empty	soil organic carbon	KF-B-26 Residual	ISGS	Questionable Date	Wang	22990	24336	1	0.682868	22482	25152	1335	0.954587	1
ISGS-3300	Pike	Kiser Creek/Baylis	wood and twigs	39.6856	-90.9525	19650	620	-25.9	unpublished	23669	743.5	Equality Formation beyond Wedron Group	Michigan Subepisode	empty	slackwater	Sec 26-2	Van Nest	OK	Van Nest	22919	24406	1	0.682973	22406	25304	1449	0.954543	1
ISGS-3265	Pope	Homberg	plant debris	37.3289	-88.5639	19640	210	-27.8	unpublished	23650	261.5	Equality Formation beyond Wedron Group	Michigan Subepisode	empty	slackwater	BF-9-2	ISGS	OK	Follmer	23414	23937	1	0.683414	23089	24149	530	0.954539	1
ISGS-3939	Madison	Keller Farm, Glen Carbon	Py-V of SOC	38.7484	-90.0028	19640	310	-24.3	Wang et al. 2003b	23650	377.5	Peoria Silt	Michigan Subepisode	empty	soil organic carbon	9.25; Keller Farm PvV	ISGS	Questionable Date	Wang	23280	24035	1	0.682793	22908	24390	741	0.95452	1
ISGS-A3769	Scott	Thomas Quarry	Succinea sp.	39.5218	-90.5153	19610	80	ND	Nash, 2016; Nash et al., 2017	23626	133.5	Peoria Silt	Michigan Subepisode	empty	loess	TQB-1.63	MRAP	OK	Grimley/Nash/Conroy	23496	23763	1	0.68388	23359	23910	275.5	0.954735	1
ISGS-3992	Madison	Keller Farm, Glen Carbon	Py-V of SOC	38.7484	-90.0028	19580	230	-24.6	Wang et al. 2003b	23594	294.5	Peoria Silt	Michigan Subepisode	empty	soil organic carbon	K-18; rerun; 4.3-4.4	ISGS	Questionable Date	Wang	23310	23899	1	0.683453	22996	24123	563.5	0.954634	1
ISGS-3464	Henderson	Lomax	twigs	40.6945	-91.0385	19500	190	-28.4	Curry, 1998	23515	261	Robein Mbr (Roxana Silt) beyond Wedron Group	Michigan Subepisode	empty	slackwater	Lomax, Equality Fm	ISGS	OK	Curry	23220	23742	1	0.683159	22995	23965	485	0.954694	1
ISGS-27	Coles	Charleston Quarry	wood	39.518	-88.1161	19500	200	ND	Kim, 1970	23515	271	Morton Tongue, Peoria Silt	Shelby Phase (max)	empty	proglacial lake		ISGS	OK	Kempton	23207	23749	1	0.683517	22979	23984	502.5	0.95466	1
ISGS-A3770	Scott	Thomas Quarry	Succinea sp.	39.5218	-90.5153	19430	80	ND	Nash, 2016; Nash et al., 2017	23448	151.5	Peoria Silt	Michigan Subepisode	empty	loess	TQB-2.37	MRAP	OK	Grimley/Nash/Conroy	23258	23561	1	0.683527	23085	23659	287	0.954849	1
ISGS-1363	Cass	Cottonwood Sch	terrestrial snail shells	40.028	-90.2955	19400	300	-6.5	Hansel and Johnson, 1996	23407	366	Peoria Silt beyond Wedron Group	Michigan Subepisode	empty	loess		ISGS	OK	Barnes	22994	23726	1	0.683331	22642	24077	717.5	0.954546	1
ISGS-3582	Jersey	Grafton	wood	38.9792	-90.45	19370	200	-25.6	unpublished	23355	257.5	Equality Formation beyond Wedron Group	Michigan Subepisode	empty	slackwater	MH4	ISGS	OK	Grimley	23059	23574	1	0.683096	22843	23864	510.5	0.954555	1
ISGS-1789	Calhoun	Salt Spring Hollow	wood	39.1156	-90.6614	19200	420	-25	Hajic, 1991	23080	484.5	Equality Formation beyond Wedron Group	Michigan Subepisode	empty	Gilead terrace, MRV	SSH-5-1	Hajic	OK	Hajic	22637	23606	1	0.683059	22305	24185	940	0.954555	1
ISGS-1989	Calhoun	Salt Spring Hollow	wood	39.1167	-90.6643	19200	420	-25	Hajic, 1991	23080	484.5	Equality Formation beyond Wedron Group	Michigan Subepisode	empty	Gilead terrace, MRV	SSH-5-1	Hajic	OK	Hajic	22637	23606	1	0.683059	22305	24185	940	0.954555	1
ISGS-96	Gallatin	Little Cypress Ditch	charcoal bearing silt	37.73	-88.248	19160	690	ND	Coleman, 1973	23050	790.5	Equality Formation beyond Wedron Group	Michigan Subepisode	empty	slackwater	< 200 mesh	ISGS	Questionable Date	Frye	22384	23965	1	0.682975	21644	25021	1688.5	0.95456	1
ISGS-3787	Henderson	Lomax	bryophytes	40.6945	-91.0385	19140	200	-29.6	Curry, 1998	23030	270	Equality Formation beyond Wedron Group	Michigan Subepisode	empty	slackwater	Lomax, Equality Fm	ISGS	OK	Curry	22812	23352	1	0.683309	22553	23558	502.5	0.954646	1
ISGS-401	Ogle	Mobile-23	organic carbon concentrated from clay	42.042	-89.238	18910	200	ND	Liu and Coleman, 1981	22770	229.5	Robein Silt	Michigan Subepisode	empty	organic carbon concentrate		ISGS	Questionable Date		22530	22989	1	0.683435	22401	23329	464	0.954564	1
ISGS-A1650	St Clair	Highbanks Section	Stagnicola elodes	38.4252	-89.7561	19020	110	-9.4	Grimley and Phillips, 2012	22723	146	Equality Formation beyond Wedron Group	Michigan Subepisode	empty	Lake Kaskaskia	16 ft	ISGS	OK	Grimley	23056	22910	1	0.682703	22555	23264	354.5	0.954793	1
ISGS-3906	Madison	Keller Farm, Glen Carbon	Py-V of SOC	38.7484	-90.0028	18770	300	-24.2	Wang et al. 2003b	22587	328.5	Peoria Silt	Farmdale Phase	empty	soil organic carbon	8.05; Keller Farm PyV	ISGS	Questionable Date	Wang	22354	23011	1	0.682708	21980	23417	718.5	0.954607	1
ISGS-1500	Calhoun	Salt Spring Hollow	wood	39.1167	-90.6643	18770	310	-24.8	Hajic, 1991	22587	342	Equality Formation beyond Wedron Group	Michigan Subepisode	empty	Gilead terrace, MRV	10.5 m from surface	Hajic	OK	Hajic	22342	23026	1	0.682743	21961	23436	737.5	0.954629	1
ISGS-1499	Calhoun	Salt Spring Hollow	wood	39.0831	-90.6669	18760	220	-25.7	Hajic, 1991	22570	231	Equality Formation beyond Wedron Group	Michigan Subepisode	empty	Gilead terrace, MRV	WLH-1-1	Hajic	OK	Hajic	22419	22881	1	0.683094	22164	23231	533.5	0.95461	1
ISGS-2437	Jackson	Happy Hollow/Grand Tower	wood	37.6869	-89.4836	18750	190	-24.7	Hansel and Johnson, 1996	22556	200.5	Equality Formation beyond Wedron Group	Michigan Subepisode	empty	Gilead terrace, MRV	WH3-2	ISGS	OK	McDonald	22431	22832	1	0.683764	22245	23108	431.5	0.954643	1
ISGS-1498	Calhoun	Salt Spring Hollow	wood	39.1167	-90.6643	18690	610	-25.4	Hajic, 1991	22512	723	Equality Formation beyond Wedron Group	Michigan Subepisode	empty	Gilead terrace, MRV	12.0 m from surface	Hajic	OK	Hajic	21891	23337	1	0.682737	21146	24115	1484.5	0.954558	1
W-524	Tazewell	Farm Creek Railroad	wood	40.6664	-89.4928	18460	500	ND	Rubin and Alexander, 1960	22362	592	Robein Mbr_Farm Creek_RailroadCut	Michigan Subepisode	empty	date dissimilar to other ages from unit		USGS	Questionable Date		21746	22930	1	0.683024	21104	23561	1228.5	0.954586	1
UCIAMS-110615	DeKalb	Burlington IWLP	stems, leaves	42.0475	-88.5661	18420	60	ND	Curry 2008; Curry et al., 2010	22338	83.5	DeKalb Mounds IWLP	Michigan Subepisode	empty	DeKalb Mounds	H-30 288-298	ISGS	OK		22244	22411	1	0.684393	22064	22474	205	0.953259	2
ISGS-1365	Rock Island	Collinson Quarry	terrestrial snail shells	41.4388	-90.5582	18420	360	-5	Hansel and Johnson, 1996	22338	410	Peoria Silt beyond Wedron Group	Michigan Subepisode	empty	loess		ISGS	OK		21844	22664	1	0.682905	21389	23144	877.5	0.954566	1
ISGS-1365	Cass	Cottonwood Sch	terrestrial snail shells	40.028	-90.2955	18420	360	-5	Hansel and Johnson, 1996	22338	410	Peoria Silt beyond Wedron Group	Michigan Subepisode	empty	loess	CQC1; From aproximatly 61cm above the base of the Peoria loess.	ISGS	OK	Barnes	21844	22664	1	0.682905	21389	23144	877.5	0.954566	1
UCIAMS-71279	Kendall	Newark IWLP	Salix leaves, stems	41.5166	-88.5513	18380	70	ND	Curry and Petras, 2011	22306	107	Marseilles MS IWLP	Livingston Phase (min)	Marseilles Subphase	lower Marseilles	Curry and Petras, B-9	ISGS	OK	Curry	22177	22391	1	0.68336	21990	22441	225.5	0.954711	1
UCIAMS-97046	McHenry	Bryn Mawr IWLP, Woodstock	Dryas leaves, stems	42.2568	-88.41360	18330	110	ND	unpublished	22257	150.5	Barlina Moraine; WOO-12y	Livingston Phase (min)	Barlina Subphase	lower Bryn Mawr	WOO-12-y_335-351	ISGS	OK	Curry	22059	22360	1	0.683361	21901	22433	266	0.954803	1
UCIAMS-115224	McHenry	Huntley	wood	42.1612	-88.4356	18330	90	ND	unpublished	22257	137.5	pre-Batestown tongue	Michigan Subepisode	empty	proglacial lake	HUN 12-09 61-65	ISGS	OK	Thomason	22080	22355	1	0.684106	21925	22417	246	0.954986	1
UCIAMS-153737	Cass	New Cottonwood School	terrestrial snail shells	40.0236	-90.2906	18330	80	-6.1	Nash, 2016; Nash et al., 2017	22257	130.5	Peoria Silt beyond Wedron Group	Michigan Subepisode	empty	loess	NCSA-8.5 ft	MRAP	OK	Nash/Grimley	22091	22352	1	0.683487	21937	22410	236.5	0.954745	1
UCIAMS-97037	Iroquois	Danforth IWLP	leaves, stems	40.8221	-87.9877	18260	70	ND	unpublished	22150	130	Gilman Moraine IWLP	Livingston Phase (min)	Gilman Subphase	Gilman Moraine		ISGS	OK	Curry	22003	22262	1	0.683509	21892	22348	228	0.954924	1
UCIAMS-147642	Cass	New Cottonwood School	terrestrial snail shells	40.0236	-90.2906	18230	110	-7	Nash, 2016; Nash et al., 2017	22110	156	Peoria Silt beyond Wedron Group	Michigan Subepisode	empty	loess	NCSA-6.7ft	MRAP	OK	Nash/Grimley	21941	22252	1	0.684075	21827	22377	275	0.95451	1
UCIAMS-26261	Kendall	Townhouse/Anderson	Salix leaves, stems	41.5031	-88.5411	18210	60	ND	Curry and Petras, 2011	22100	121	Marseilles MS IWLP	Livingston Phase (min)	Marseilles Subphase	lower Marseilles	KC-5; 782-792	ISGS	OK	Curry	21946	22188	1	0.683658	21859	22288	214.5	0.954603	1
AA-97886UF	Calhoun	IL.31.Belleview	Mammuthus	39.3541	-90.7573	18220	240	-20.3	Widga et al., 2017	22100	267	Equality Formation beyond Wedron Group	Michigan Subepisode	empty	slackwater		ISM	OK	Widga	21829	22363	1	0.683191	21455	22559	552	0.954523	1
ISGS-3264	Pope	Homberg	plant debris	37.3289	-88.5639	18160	190	-27.9	unpublished	21968	234	Equality Formation beyond Wedron Group	Michigan Subepisode	empty	slackwater	BF-9-3	ISGS	OK	Follmer	21810	22277	1	0.683769	21541	22432	445.5	0.954641	1
UCIAMS-71284	Kendall	Newark IWLP	Salix leaves, stems	41.5152	-88.5505	18140	80	ND	Curry and Petras, 2011	21946	132	Marseilles MS IWLP	Livingston Phase (min)	Marseilles Subphase	lower Marseilles	Curry and Petras, B-2	ISGS	OK	Curry	21856	22120	1	0.684562	21761	22275	257	0.954784	1
UCIAMS-115228	Henderson	Lomax	stems, leaves	40.6945	-91.0385	18130	100	ND	Curry, 1998	21930	152	Equality Formation beyond Wedron Group	Michigan Subepisode	empty	slackwater		ISGS	OK	Curry	21834	22137	1	0.684191	21690	22295	302.5	0.954871	1
UCIAMS-147636	Cass	New Cottonwood School	terrestrial snail shells	40.0236	-90.2906	18100	110	-6.8	Nash, 2016; Nash et al., 2017	21903	166	Peoria Silt beyond Wedron Group	Michigan Subepisode	empty	loess	NCSA-9.4ft	MRAP	OK	Nash/Grimley	21792	22124	1	0.682981	21622	22277	327.5	0.954853	1
UCIAMS-97068	Lee	Hedge/Cyclone Rds, Paw Paw	Dryas leaves, stems	41.656	-89.0526	18080	90	ND	unpublished	21887	144	Paw Paw Moraine IWLP	Putnam Phase (min)	empty	Paw Paw Moraine	PawPaw11-01A,B;15-15.5	ISGS	OK	Curry	21776	22064	1	0.684025	21628	22214	293	0.954617	1
UCIAMS-153738	Cass	New Cottonwood School	terrestrial snail shells	40.0236	-90.2906	18070	80	-5.4	Nash, 2016; Nash et al., 2017	21874	131	New Cottonwood School (Peoria Silt)	Michigan Subepisode	empty	loess	NCSA-9.5ft	MRAP	OK	Nash/Grimley	21770	22031	1	0.683602	21631	22180	274.5	0.954659	1
UCIAMS-71277	Kendall	Newark IWLP	Salix leaves, stems	41.516	-88.5514	17970	70	ND	Curry and Petras, 2011	21794	112	Marseilles MS IWLP	Livingston Phase (min)	Marseilles Subphase	middle Marseilles	Curry and Petras, B-3	ISGS	OK	Curry	21657	21880	1	0.684044	21529	21988	229.5	0.954824	1
UCIAMS-97045	McHenry	Bryn Mawr IWLP, Woodstock	Dryas leaves, stems	42.2568	-88.41360	17990	110	ND	unpublished	21786	160	Barlina Moraine (Bryn Mawr IWLP)	Livingston Phase (min)	Barlina Subphase	lower Bryn Mawr	WOO 12-y-_366-393	ISGS	OK	Curry	21620	21930	1	0.683191	21460	22130	340	0.954572	1
W-1055	Madison	Collinsville	wood	38.6866	-90.0048	17950	550	ND	Ives et al.,1964	21778	660	Peoria Silt (Jules Soil)	Michigan Subepisode	empty	loess		USGS	OK		21059	22379	1	0.682899	20390	23054	1332	0.954541	1
ISGS-7105	Champaign	Sangamon River/ Mahomet	wood	40.18	-88.4392	17940	170	-25	unpublished	21770	232	Morton Tongue, Peoria Silt	Shelby Phase (max)	empty	slackwater	MHT-4-log	ISGS	OK	Grimley	21482	21945	1	0.683516	21254	22233	489.5	0.954544	1
UCIAMS-71287	Kendall	Newark IWLP	Salix leaves, stems	41.514	-88.5505	17930	90	ND	Curry and Petras, 2011	21762	130	Marseilles MS IWLP	Livingston Phase (min)	Marseilles Subphase	middle Marseilles	Curry and Petras, B-4	ISGS	OK	Curry	21593	21853	1	0.683387	21435	21970	267.5	0.954703	1
UCIAMS-153736	Cass	New Cottonwood School	terrestrial snail shells	40.0236	-90.2906	17930	80	-5.6	Nash, 2016; Nash et al., 2017	21762	121	New Cottonwood School (Peoria Silt)	Michigan Subepisode	empty	loess	NCSA-5.1 ft	MRAP	OK	Nash/Grimley	21604	21846	1	0.684407	21460	21949	244.5	0.954593	1
UCIAMS-71278	Kendall	Newark IWLP	Salix leaves, stems	41.516	-88.5514	17915	50	ND	Curry and Petras, 2011	21753	100	Marseilles MS IWLP	Livingston Phase (min)	Marseilles Subphase	middle Marseilles	Curry and Petras, B-3	ISGS	OK	Curry	21618	21818	1	0.684956	21506	21895	194.5	0.954784	1
UCIAMS-71285	Kendall	Newark IWLP	Salix leaves, stems	41.5152	-88.5505	17900	100	ND	Curry and Petras, 2011	21740	142.5	Marseilles MS IWLP	Livingston Phase (min)	Marseilles Subphase	middle Marseilles	Curry and Petras, B-2	ISGS	OK	Curry	21550	21835	1	0.683667	21376	21955	289.5	0.954594	1
CAMS-8089	Scott	Thomas Quarry	Succinea sp.	39.5224	-90.5118	17900	80	ND	Nash, 2016; Nash et al., 2017	21740	124	Peoria Silt	Michigan Subepisode	empty	loess	TQ-5.5	MRAP	OK	Grimley/Nash/Conroy	21573	21821	1	0.68382	21430	21918	244	0.954619	1
UCIAMS-71280	Kendall	Newark IWLP	Salix leaves, stems	41.5155	-88.5507	17890	80	ND	Curry and Petras, 2011	21713	125.5	Marseilles MS IWLP	Livingston Phase (min)	Marseilles Subphase	middle Marseilles	Curry and Petras, B-6	ISGS	OK	Curry	21562	21813	1	0.68345	21418	21908	245	0.95465	1
UCIAMS-71286	Kendall	Newark IWLP	Salix leaves, stems	41.514	-88.5505	17880	50	ND	Curry and Petras, 2011	21695	105.5	Marseilles MS IWLP	Livingston Phase (min)	Marseilles Subphase	middle Marseilles	Curry and Petras, B-2b	ISGS	OK	Curry	21575	21786	1	0.683786	21464	21863	199.5	0.954787	1
UCIAMS-152187	Iroquois	Hendricks Farm	Dryas leaves, stems	40.6687	-87.9237	17870	90	ND	unpublished	21659	138	Gilman Moraine IWLP	Livingston Phase (min)	Gilman Subphase	Gilman Moraine	MRAP3-14-14 Hendrick BBC-6	MRAP	OK	Curry	21527	21803	1	0.683937	21369	21906	268.5	0.954886	1
UCIAMS-147641	Cass	New Cottonwood School	terrestrial snail shells	40.0236	-90.2906	17820	100	-7.8	Nash, 2016; Nash et al., 2017	21578	157.5	Peoria Silt beyond Wedron Group	Michigan Subepisode	empty	loess	NCSA-6.0ft	MRAP	OK	Nash/Grimley	21444	21759	1	0.683073	21266	21880	307	0.954809	1
UCIAMS-97038	Iroquois	Danforth IWLP	leaves, stems	40.8221	-87.9877	17810	80	ND	unpublished	21566	140	Gilman Moraine IWLP	Livingston Phase (min)	Gilman Subphase	Gilman Moraine		ISGS	OK	Curry	21444	21724	1	0.682905	21310	21846	268	0.954703	1
UCIAMS-71291	Kendall	Newark IWLP	Salix leaves, stems	41.514	-88.5505	17800	80	ND	Curry and Petras, 2011	21553	141.5	Marseilles MS IWLP	Livingston Phase (min)	Marseilles Subphase	upper Marselles	Curry and Petras, B-4	ISGS	OK	Curry	21428	21711	1	0.684348	21292	21837	272.5	0.954558	1
AA-97882	Adams	IL.64.Painter Creek	Mammuthus primigenius	40.2278	-91.2217	17770	100	-18.2	Widga et al., 2017	21525	166	Equality Formation beyond Wedron Group	Michigan Subepisode	empty	slackwater		ISM	OK	Widga	21361	21693	1	0.683537	21186	21837	325.5	0.954665	1
UCIAMS-26260	Kendall	Townhouse/Anderson	Salix leaves, stems	41.5031	-88.5411	17760	60	ND	Curry and Petras, 2011	21520	122	Marseilles MS IWLP	Livingston Phase (min)	Marseilles Subphase	upper Marselles	KC-5; 524-579	ISGS	OK	Curry	21386	21630	1	0.684145	21266	21769	251.5	0.954806	1
ISGS-2554	Jackson	Southern Illinois Airport-MDH	wood	37.7672	-89.2561	17730	210	-24.8	Esling and Blum, 1995	21469	294.5	Equality Formation beyond Wedron Group	Michigan Subepisode	empty	slackwater	MB-1	SIU	OK	Trent	21174	21763	1	0.683217	20860	21999	569.5	0.954525	1
UCIAMS-71276	Kendall	Newark IWLP	Salix leaves, stems	41.514	-88.5505	17720	70	ND	Curry and Petras, 2011	21443	134.5	Marseilles MS IWLP	Livingston Phase (min)	Marseilles Subphase	upper Marselles	Curry and Petras, B-4	ISGS	OK	Curry	21320	21589	1	0.682896	21171	21736	282.5	0.954506	1
UCIAMS-71283	Kendall	Newark IWLP	Salix leaves, stems	41.514	-88.5505	17700	70	ND	Curry and Petras, 2011	21420	136.5	Marseilles MS IWLP	Livingston Phase (min)	Marseilles Subphase	upper Marseilles	Curry and Petras, B-4	ISGS	OK	Curry	21291	21564	1	0.684011	21131	21704	286.5	0.954719	1
UCIAMS-71289	Kendall	Newark IWLP	Salix leaves, stems	41.516	-88.5514	17700	60	ND	Curry and Petras, 2011	21420	125	Marseilles MS IWLP	Livingston Phase (min)	Marseilles Subphase	upper Marseilles	Curry and Petras, B-3	ISGS	OK	Curry	21303	21553	1	0.683616	21157	21687	265	0.954548	1
UCIAMS-46838	Champaign	Kirby/English Oak flood retention	Salix leaves, stems	40.0998	-88.3259	17695	45	ND	unpublished	21420	110	Equality Formation above Wedron Group	Michigan Subepisode	empty	kettle		ISGS	OK	Curry	21313	21533	1	0.68321	21180	21651	235.5	0.954531	1
UCIAMS-71288	Kendall	Newark IWLP	Salix leaves, stems	41.5152	-88.5505	17690	70	ND	Curry and Petras, 2011	21402	137.5	Marseilles MS IWLP	Livingston Phase (min)	Marseilles Subphase	upper Marseilles	Curry and Petras, B-2	ISGS	OK	Curry	21275	21550	1	0.684322	21112	21686	287	0.954831	1
UCIAMS-147635	Cass	New Cottonwood School	terrestrial snail shells	40.0236	-90.2906	17690	100	-8.7	Nash, 2016; Nash et al., 2017	21402	173	Peoria Silt beyond Wedron Group	Michigan Subepisode	empty	loess	NCSA-7.7ft	MRAP	OK	Nash/Grimley	21234	21580	1	0.682873	21056	21742	343	0.954556	1
ISGS-767	Champaign	Sunnycrest Ditch	wood, roots	40.0969	-88.1915	17690	270	-26.6	Liu et al., 1986	21402	361.5	Equality Formation above Wedron Group	Putnam Phase (min)	empty	kettle		ISGS	OK	Johnson	21046	21769	1	0.682854	20690	22121	715.5	0.954601	1
ISGS-109	Sangamon	Sangamon R., B-4	organic silt	39.811	-89.7125	17650	450	ND	Coleman, 1974; Miller, 1973	21352	564	Equality Formation beyond Wedron Group	Michigan Subepisode	empty	Lake Calhoun		ISGS	OK		20771	21899	1	0.68297	20286	22440	1077	0.954533	1
ISGS-3833	Madison	Keller Farm, Glen Carbon	Py-V of SOC	38.7484	-90.0028	17630	250	-25.7	Wang et al. 2003b	21335	341	Peoria Silt	Farmdale Phase	empty	soil organic carbon	5.95; Keller Farm PyV	ISGS	Questionable Date	Wang	20979	21661	1	0.683202	20651	21961	655	0.954507	1
Ox-A-W917-9	DeKalb	Hampshire	leaves, stems	42.0692	-88.5208	17610	270	ND	Curry 2008; Curry et al., 2010	21310	364	DeKalb Mounds IWLP	Michigan Subepisode	empty	DeKalb Mounds	API 35527; 759 cm depth	ISGS	OK	Curry	20933	21661	1	0.68338	20587	21991	702	0.954534	1
ISGS-4103	Madison	Keller Farm, Glen Carbon	Py-V of SOC	38.7484	-90.0028	17610	160	-25.1	unpublished	21310	238.5	Peoria Silt	Michigan Subepisode	empty	soil organic carbon	K-45; 4.9-5.0	ISGS	Questionable Date	Wang	21047	21524	1	0.682907	20856	21773	458.5	0.954614	1
ISGS-1364	Cass	Cottonwood Sch	terrestrial snail shells	40.028	-90.2955	17600	320	-6.2	Hansel and Johnson, 1996	21305	420.5	Peoria Silt beyond Wedron Group	Michigan Subepisode	empty	loess		ISGS	OK	Barnes	20875	21716	1	0.682921	20503	22148	822.5	0.954605	1
UCIAMS-71281	Kendall	Newark IWLP	Salix leaves, stems	41.5166	-88.5513	17595	45	ND	Curry and Petras, 2011	21295	117.5	Marseilles MS IWLP	Livingston Phase (min)	Marseilles Subphase	upper Marseilles	Curry and Petras, B-9	ISGS	OK	Curry	21150	21385	1	0.684219	21030	21486	228	0.954667	1
Beta-2940	Henderson	Biggsville	wood	40.8528	-90.8798	17570	150	ND	Baker et al., 1989	21250	225	Robein Mbr (Roxana Silt) beyond Wedron Group	Michigan Subepisode	empty	soil	5.73 - 5.82	Hallberg	OK	Hallberg	21008	21458	1	0.683386	20817	21701	442	0.954535	1
UCIAMS-97040	Lee	450 Hedge	Dryas leaves, stems	41.6499	-89.0534	17560	50	ND	unpublished	21222	120	Paw Paw Moraine IWLP	Putnam Phase (min)	empty	Paw Paw Moraine	PawPaw 11-02A,B;26-26.3	ISGS	OK	Curry	21097	21337	1	0.684281	20985	21446	230.5	0.954944	1
ISGS-A0021	Kane	Fox River Stone Co	leaves, stems	41.9785	-88.3208	17540	130	ND	Curry et al., 1999	21170	200	Equality Formation above Wedron Group	Livingston Phase (min)	Minooka Subphase	Minooka Moraine	proglacial lake sediments buried by deltaic sands	ISGS	OK	Curry	20992	21392	1	0.683246	20816	21605	394.5	0.95452	1
ISGS-1811	St. Louis, MO	Bonfils Quarry	wood	38.7638	-90.4502	17540	210	.22.3	Hajic, 1991	21170	294.5	Peoria Silt beyond Wedron Group	Michigan Subepisode	empty	loess		ISGS	OK	Hajic	20908	21497	1	0.68312	20662	21792	565	0.954687	1
ISGS-88	Gallatin	Little Cypress Ditch	charcoal bearing silt	37.73	-88.248	17510	330	ND	Coleman, 1973	21149	433.5	Equality Formation beyond Wedron Group	Michigan Subepisode	empty	slackwater		ISGS	Questionable Date	Frye	20732	21599	1	0.682973	20342	22047	852.5	0.95453	1
UCIAMS-97041	Lee	450 Hedge	Dryas leaves, stems	41.6499	-89.0534	17500	70	ND	unpublished	21135	134	Paw Paw Moraine IWLP	Putnam Phase (min)	empty	Paw Paw Moraine	PawPaw 11-02A,B;25-25.5	ISGS	OK	Curry	21001	21269	1	0.68286	20884	21398	257	0.954938	1
ISGS-2745	Calhoun	Hardin	snails	38.9833	-90.6	17490	490	-15.1	Grimley et al., 1998	21130	612	Peoria Silt beyond Wedron Group	Michigan Subepisode	empty	loess	GBH LP	ISGS	OK	Grimley	20565	21789	1	0.682713	20034	22388	1177	0.954594	1
UCIAMS-71292	Kendall	Newark IWLP	Salix leaves, stems	41.5166	-88.5513	17480	60	ND	Curry and Petras, 2011	21099	124	Marseilles MS IWLP	Livingston Phase (min)	Marseilles Subphase	upper Marseilles	Curry and Petras, B-9	ISGS	OK	Curry	20980	21228	1	0.683434	20878	21350	236	0.954747	1
UCIAMS-157647	Kendall	1850 Wolfs Crossing, Oswego	leaves, stems	41.685	-88.2934	17440	70	ND	unpublished	21031	131	Minooka Moraine IWLP	Livingston Phase (min)	Minooka Subphase	Minooka Moraine	OSW_2,3, 498_538	ISGS	OK	Curry	20918	21180	1	0.683589	20815	21323	254	0.954541	1
ISGS-4095	Madison	Keller Farm, Glen Carbon	Py-V of SOC	38.7484	-90.0028	17380	310	-25.5	Wang et al. 2003b	20961	408.5	Peoria Silt	Michigan Subepisode	empty	soil organic carbon	5.35; Keller Farm PyV	ISGS	Questionable Date	Wang	20595	21412	1	0.682846	20242	21842	800	0.954535	1
UCIAMS-147639	Cass	New Cottonwood School	terrestrial snail shells	40.0236	-90.2906	17370	100	-6.7	Nash, 2016; Nash et al., 2017	20958	159.5	Peoria Silt beyond Wedron Group	Michigan Subepisode	empty	loess	NCSA-3.9ftS	MRAP	OK	Nash/Grimley	20794	21113	1	0.68283	20661	21292	315.5	0.954503	1
ISGS-4438	Cass	Seaman Farm, Beardstown	Py-R of SOC	40.0096	-90.336456	17350	330	-26.7	unpublished	20925	432.5	Peoria Silt beyond Wedron	Michigan Subepisode	empty	soil organic carbon	SF 2.7-3.0, Residual	ISGS	Questionable Date		20542	21407	1	0.683006	20157	21847	845	0.954579	1
CAMS-160003	Madison	Keller Farm, Glen Carbon	Succinea sp.	38.7484	-90.0028	17320	40	ND	unpublished	20881	93.5	Peoria Silt beyond Wedron Group	Michigan Subepisode	empty	loess	Keller Farm; 9.35 m	USGS	OK	Pigatti	20795	20982	1	0.683323	20698	21074	188	0.95458	1
CAMS-160000	Madison	Keller Farm, Glen Carbon	Discus macclintockii	38.7484	-90.0028	17310	40	ND	unpublished	20869	94	Peoria Silt beyond Wedron Group	Michigan Subepisode	empty	loess	Keller Farm; 9.35 m	USGS	OK	Pigatti	20781	20969	1	0.684766	20688	21061	186.5	0.955078	1
UCIAMS-156030	Mason	Smith Lake	inflorescence, stalks (grass)	40.1484	-89.8136	17310	60	ND	unpublished	20869	110	Equality Formation above Wedron Group	Michigan Subepisode	empty	kettle	Smith Lake 475-478	ISGS	OK	Curry	20763	20983	1	0.684591	20659	21095	218	0.954844	1
UCIAMS-110616	DeKalb	Burlington IWLP	leaves, stems	42.0475	-88.5661	17295	50	ND	unpublished	20851	101	DeKalb Mounds IWLP	Michigan Subepisode	empty	DeKalb Mounds	H-30 298-303	ISGS	OK	Curry	20752	20954	1	0.684317	20660	21055	197.5	0.954583	1
UCIAMS-152186	McHenry	Jill Thomas prop	Dryas leaves, stems	42.234	-88.4368	17290	80	ND	unpublished	20845	126.5	Barlina Moraine IWLP (Jill Thomas)	Livingston Phase (min)	Barlina Subphase	Barlina Moraine	MRAP 3-14-3 19-19.5 BBC-5	MRAP	OK	Curry	20717	20970	1	0.683476	20604	21110	253	0.95486	1
UCIAMS-23765	Kane	Burlington IWLP	leaves, stems	42.0451	-88.5787	17290	140	ND	Curry 2008; Curry et al., 2010	20845	193	DeKalb Mounds IWLP	Michigan Subepisode	empty	DeKalb Mounds	API 35155; H-30	ISGS	OK	Curry	20653	21039	1	0.682702	20504	21288	392	0.954546	1
UCIAMS-23769	Kane	Burlington IWLP	stems, leaves	42.0471	-88.5661	17250	60	ND	Curry 2008; Curry et al., 2010	20800	105	DeKalb Mounds IWLP	Michigan Subepisode	empty	DeKalb Mounds	API 35696; 579 cm depth	ISGS	OK	Curry	20691	20901	1	0.683537	20599	21014	207.5	0.954993	1
ISGS-4194	Monroe	Fogelpole Cave	Py-R of SOC	38.1917	-90.1333	17260	560	-26.8	Panno et al., 2004	20800	704.5	unnamed unit	Michigan Subepisode	empty	cave	F98-F3-Residual	ISGS	OK	Panno/Wang	20175	21584	1	0.682969	19604	22325	1360.5	0.95452	1
ISGS-1832	Henderson	Lomax	twigs	40.6945	-91.0385	17240	190	-28.6	Curry, 1998	20780	250	Equality Formation beyond Wedron Group	Michigan Subepisode	empty	slackwater		ISGS	OK	Curry	20546	21046	1	0.683007	20317	21366	524.5	0.954626	1
CAMS-160004	Madison	Keller Farm, Glen Carbon	Succinea sp.	38.7484	-90.0028	17205	40	ND	unpublished	20740	88.5	Peoria Silt beyond Wedron Group	Michigan Subepisode	empty	loess	Keller Farm; 9.35 m	USGS	OK	Pigatti	20655	20832	1	0.685148	20580	20928	174	0.954691	1
CAMS-8088	Scott	Thomas Quarry	Succinea sp.	39.5224	-90.5118	17170	80	ND	Nash, 2016; Nash et al., 2017	20691	118	Peoria Silt	Michigan Subepisode	empty	loess	TQ-6.5	MRAP	OK	Grimley/Nash/Conroy	20588	20824	1	0.684325	20486	20955	234.5	0.954569	1
UCIAMS-157645	McHenry	Fehrman Farm	Dryas leaves, stems	42.3453	-88.5369	17130	80	-26.8	unpublished	20646	116.5	Woodstock Moraine IWLP	Woodstock Phase (min)	empty	Woodstock Moraine	FEHR-4 713-723	ISGS	OK	Curry	20544	20777	1	0.682961	20441	20918	238.5	0.95475	1
W-730	Madison	Burdich Branch	terrestrial snail shells	38.733	-90	17100	300	ND	Rubin and Alexander, 1960	20613	388.5	Peoria Silt beyond Wedron Group	Michigan Subepisode	empty	loess		USGS	OK		20238	21015	1	0.6832	19927	21493	783	0.954614	1
UCIAMS-23770	Kane	Burlington IWLP	leaves, stems	42.0471	-88.5661	17090	190	ND	Curry 2008; Curry et al., 2010	20603	247.5	DeKalb Mounds IWLP	Michigan Subepisode	empty	DeKalb Mounds	API 35696; 10.9-11 ft	ISGS	OK	Curry	20375	20870	1	0.683055	20112	21128	508	0.954514	1
CAMS-160005	Madison	Keller Farm, Glen Carbon	Succinea sp.	38.7484	-90.0028	17080	40	ND	unpublished	20598	76.5	Peoria Silt beyond Wedron Group	Michigan Subepisode	empty	loess	Keller Farm; 9.35 m	USGS	OK	Pigatti	20520	20673	1	0.685229	20442	20770	164	0.954533	1
ISGS-2169	Adams	Lima	stems	40.1539	-91.375	17060	640	-29.6	Hansel and Johnson, 1996	20572	804	Equality Formation beyond Wedron Group	Michigan Subepisode	empty	slackwater	WOAK-3, 440-470	IAS	OK		19859	21467	1	0.682769	19196	22319	1561.5	0.954579	1
CAMS-160001	Madison	Keller Farm, Glen Carbon	Hendersonia occulta	38.7484	-90.0028	17055	35	ND	unpublished	20568	72	Peoria Silt beyond Wedron Group	Michigan Subepisode	empty	loess	Keller Farm; 9.35 m	USGS	OK	Pigatti	20498	20642	1	0.684738	20417	20729	156	0.954794	1
ISGS-1790	St. Louis, MO	Bonfils Quarry	wood	38.7638	-90.4502	17050	280	-25.3	Hajic, 1991	20563	357.5	Peoria Silt beyond Wedron Group	Michigan Subepisode	empty	loess		ISGS	OK	Hajic	20207	20922	1	0.682848	19906	21369	731.5	0.954539	1
UCIAMS-157644	McHenry	Fehrman Farm	Dryas leaves, stems	42.3453	-88.5369	17040	80	-26.5	unpublished	20553	115	Woodstock Moraine IWLP	Woodstock Phase (min)	empty	Woodstock Moraine	FEHR-4 703-713	ISGS	OK	Curry	20441	20671	1	0.683513	20301	20802	250.5	0.954674	1
UCIAMS-147638	Cass	New Cottonwood School	terrestrial snail shells	40.0236	-90.2906	16920	100	-9	Nash, 2016; Nash et al., 2017	20430	140.5	Peoria Silt beyond Wedron Group	Michigan Subepisode	empty	loess	NCSA-3.9ftW	MRAP	OK	Nash/Grimley	20267	20548	1	0.683276	20109	20671	281	0.954629	1
UCIAMS-157643	McHenry	Fehrman Farm	Dryas leaves, stems	42.3453	-88.5369	16910	70	ND	unpublished	20419	112.5	Woodstock Moraine IWLP	Woodstock Phase (min)	empty	Woodstock Moraine	FEHR-4 703-713	ISGS	OK	Curry	20289	20514	1	0.683533	20154	20603	224.5	0.954634	1
ISGS-5958	Champaign	Champaign (Abbey Fields)	wood (Dryas plants)	40.1011	-88.3283	16810	200	-27.3	unpublished	20270	242	Equality Formation above Wedron Group	Michigan Subepisode	empty	kettle	CP-1	ISGS	OK	Shilts	20043	20527	1	0.682807	19775	20798	511.5	0.954642	1
UCIAMS-157641	McHenry	Fehrman Farm	Dryas leaves, stems	42.3576	-88.532	16800	70	ND	unpublished	20259	119	Woodstock Moraine IWLP	Woodstock Phase (min)	empty	Woodstock Moraine	HAM 626_658	ISGS	OK	Curry	20146	20384	1	0.683246	20042	20488	223	0.954586	1
UCIAMS-157642	McHenry	Hamid Farm	Dryas leaves, stems	42.3453	-88.5369	16760	70	ND	unpublished	20204	116.5	Woodstock Moraine IWLP	Woodstock Phase (min)	empty	Woodstock Moraine	FEHR-4 552-576	ISGS	OK	Curry	20097	20330	1	0.683959	20002	20451	224.5	0.954766	1
ISGS-4570	Monroe	Illinois Caverns	organic silt	38.2355	-90.1369	16710	370	-24.9	Panno et al., 2004	20151	455	unnamed unit	Michigan Subepisode	empty	cave		ISGS	OK	Panno	19697	20607	1	0.683208	19254	21146	946	0.954587	1
CAMS-160002	Madison	Keller Farm, Glen Carbon	Hendersonia occulta	38.7484	-90.0028	16710	35	ND	unpublished	20151	87.5	Peoria Silt beyond Wedron Group	Michigan Subepisode	empty	loess	Keller Farm; 9.35 m	USGS	OK	Pigatti	20063	20238	1	0.685357	19984	20334	175	0.954701	1
Ox-A-W917-11	DeKalb	Hampshire	leaves, stems	42.0692	-88.5208	16700	90	ND	Curry 2008; Curry et al., 2010	20138	130.5	DeKalb Mounds IWLP	Michigan Subepisode	empty	DeKalb Mounds	API 35527; 610 cm depth	ISGS	OK	Curry	20019	20280	1	0.683398	19899	20429	265	0.954904	1
UCIAMS-147640	Cass	New Cottonwood School	terrestrial snail shells	40.0236	-90.2906	16570	960	-5.6	Nash, 2016; Nash et al., 2017	20005	1162.5	Peoria Silt beyond Wedron Group	Michigan Subepisode	empty	loess	NCSA-4.9ft	MRAP	OK	Nash/Grimley	18912	21237	1	0.682762	18003	22622	2309.5	0.954534	1
UCIAMS-156028	Mason	Smith Lake	inflorescence, stalks (grass)	40.1484	-89.8136	16550	60	ND	unpublished	19987	104.5	Equality Formation above Wedron Group	Michigan Subepisode	empty	kettle	Smith Lake 439-443	ISGS	OK	Curry	19869	20078	1	0.683898	19735	20172	218.5	0.954699	1
UCIAMS-157640	McHenry	Hamid Farm	Dryas leaves, stems	42.3576	-88.532	16550	70	-27.1	unpublished	19987	114	Woodstock Moraine IWLP	Woodstock Phase (min)	empty	Woodstock Moraine	HAM 502_518	ISGS	OK	Curry	19858	20086	1	0.683682	19712	20186	237	0.954565	1
Gx-15444	Henderson	Lomax	snails	40.6945	-91.0385	16190	1100	ND	Curry, 1998	19543	1339	Peoria Silt beyond Wedron Group	Michigan Subepisode	empty	loess		ISGS	OK	Curry	18359	21037	1	0.682787	17244	22739	2747.5	0.954518	1
ISGS-78	Rock Island	Reynolds School	wood	41.375	91	16160	140	ND	Coleman, 1973	19513	195	Equality above Henry	Michigan Subepisode	empty	slackwater		ISGS	OK		19284	19674	1	0.683875	19122	19910	394	0.954651	1
UCIAMS-71290	Kendall	Newark IWLP	Salix leaves, stems	41.5152	-88.5505	16130	360	ND	Curry and Petras, 2011	19484	427.5	Marseilles MS IWLP	Michigan Subepisode	empty	anomolously young compared with other ages		ISGS	Questionable Date	Curry	19033	19888	1	0.683	18719	20374	827.5	0.954587	1
ISGS-1612	Bureau	Neponset	organic silt	41.2567	-89.8256	16080	540	-28.6	Hansel and Johnson, 1996	19431	618.5	Equality Formation above Wedron Group	Michigan Subepisode	empty	slackwater	Bu6-10	ISGS	OK	Olson	18817	20054	1	0.682835	18291	20846	1277.5	0.954528	1
ISGS-4127	Madison	Keller Farm, Glen Carbon	Py-V of SOC	38.7484	-90.0028	16040	90	-24.5	Wang et al. 2003b	19370	131	Peoria Silt	mixed	empty	soil organic carbon	4.25; Keller Farm PyV	ISGS	Questionable Date	Wang	19230	19492	1	0.683721	19081	19599	259	0.954556	1
ISGS-421	St. Clair	Canteen Creek	organic clay	38.642	-90.025	16020	260	ND	Liu and Coleman, 1981	19340	309.5	Peoria Silt beyond Wedron	Michigan Subepisode	empty	organic carbon concentrate		ISGS	Questionable Date		18994	19613	1	0.683445	18789	19982	596.5	0.954524	1
I-1719	Warren	Kirkwood	terrestrial snail shells	40.895	-90.7517	16000	340	ND	Frye et al., 1968	19291	391	Peoria Silt beyond Wedron Group	Michigan Subepisode	empty	loess		ISGS	OK		18907	19689	1	0.682701	18614	20156	771	0.954574	1
NZA28851	Bureau	IL.82.Wyanet	Mammuthus	41.3667	-89.65	15947	60	-20.8	Saunders et al., 2010	19219	116.5	Equality Formation above Wedron Group	Hudson Episode	empty	kettle		ISM	OK	Saunders	19124	19357	1	0.683986	19022	19464	221	0.954617	1
ISGS-2175	McDonough	Macomb	organic silt	40.4917	-90.675	15910	160	-24.1	Hansel and Johnson, 1996	19185	203.5	Peoria Silt beyond Wedron Group	Michigan Subepisode	empty	loess	H1P1	Balek	OK	Balek	18990	19397	1	0.682931	18846	19590	372	0.954762	1
UCIAMS-152190	McHenry	Bryn Mawr IWLP, Woodstock	Dryas leaves, stems	42.2586	-88.4067	15860	70	ND	unpublished	19100	106.5	Barlina Moraine (Bryn Mawr IWLP)	Livingston Phase (min)	Barlina Subphase	middle Bryn Mawr	WOO-12z stems	MRAP	OK	Curry	19002	19215	1	0.684725	18921	19355	217	0.954993	1
ISGS-6664	Mason	Manito Sand Pit	Py-R of SOC	40.3762	-89.9065	15860	280	-22.5	Wang et al., 2012	19100	314	Equality Formation beyond Wedron Group	Michigan Subepisode	empty	slackwater		ISGS	OK	Wang	18856	19484	1	0.683096	18593	19870	638.5	0.95465	1
UCIAMS-26256	Kendall	Reservation Rd/Morgan Ck	stems, leaves, no Dryas	41.6376	-88.372	15750	45	ND	Curry et al., 2014	18968	67.5	Equality Formation above Wedron Group	Michigan Subepisode	empty	Kankakee Torrent	#1 KC2 28-29cm .43mgC	ISGS	OK	Curry	18911	19046	1	0.685466	18870	19148	139	0.955135	1
UCIAMS-23772	Kane	Burlington IWLP	stems, leaves, no Dryas	42.0471	-88.5661	15740	150	ND	Curry 2008; Curry et al., 2010	18955	172	DeKalb Mounds IWLP	Michigan Subepisode	empty	DeKalb Mounds	API 35696; 415 cm depth	ISGS	OK	Curry	18830	19174	1	0.683996	18706	19417	355.5	0.954557	1
UCIAMS-26258	Kendall	Reservation Rd/Morgan Ck	stems, leaves, no Dryas	41.6376	-87.9074	15670	140	ND	Curry et al., 2014	18904	152.5	Equality Formation above Wedron Group	Michigan Subepisode	empty	Kankakee Torrent	#3 KC3 28.0-29.5cm .069mgC	ISGS	OK	Curry	18768	19073	1	0.683767	18632	19280	324	0.95458	1
UCIAMS-26257	Kendall	Reservation Rd/Morgan Ck	stems, leaves, no Dryas	41.6376	-87.9074	15660	60	ND	Curry et al., 2014	18894	67.5	Equality Formation above Wedron Group	Michigan Subepisode	empty	Kankakee Torrent	#2 KC2 29.0-29.4cm .2mgC	ISGS	OK	Curry	18826	18961	1	0.683498	18761	19049	144	0.954897	1
UCIAMS-150516	McHenry	Bryn Mawr IWLP, Woodstock	Dryas leaves, stems	42.2586	-88.4067	15650	60	ND	unpublished	18884	66.5	Barlina Moraine (Bryn Mawr IWLP)	Livingston Phase (min)	Barlina Subphase	middle Bryn Mawr	MRAP3-14-20 110-120 R3	MRAP	OK	Curry	18818	18951	1	0.685684	18755	19037	141	0.95508	1
UCIAMS-150515	McHenry	Bryn Mawr IWLP, Woodstock	Dryas leaves, stems	42.2586	-88.4067	15640	60	ND	unpublished	18876	65	Barlina Moraine (Bryn Mawr IWLP)	Livingston Phase (min)	Barlina Subphase	middle Bryn Mawr	MRAP3-14-20 100-110 CM BBC-3	MRAP	OK	Curry	18811	18941	1	0.684114	18748	19025	138.5	0.955001	1
ISGS-137	Cass	Cottonwood School South	terrestrial snail shells	40.0264	-90.292	15640	580	ND	Coleman, 1974	18876	670	Peoria Silt; Jules Geosol	Michigan Subepisode	empty	snail shells with secondary carbonate		ISGS	Questionable Date		18294	19634	1	0.682901	17694	20431	1368.5	0.954577	1
UCIAMS-152189	McHenry	Bryn Mawr IWLP, Woodstock	Dryas leaves, stems	42.2586	-88.4067	15620	70	ND	unpublished	18859	71	Barlina Moraine (Bryn Mawr IWLP)	Livingston Phase (min)	Barlina Subphase	middle Bryn Mawr	MRAP 3-14-20 130-140 R3	MRAP	OK	Curry	18789	18931	1	0.685667	18715	19024	154.5	0.955029	1
UCIAMS-124007	McHenry	Bryn Mawr IWLP, Woodstock	Dryas leaves, stems	42.2574	-88.4135	15610	70	-26.7	unpublished	18850	70	Barlina Moraine (Bryn Mawr IWLP)	Livingston Phase (min)	Barlina Subphase	middle Bryn Mawr	WOO-12-z_798-leaves	ISGS	OK	Curry	18783	18923	1	0.684118	18707	19013	153	0.954858	1
W-381	Fulton	Spoon River; KT?	wood	40.349	-90.1731	15600	600	ND	Rubin and Alexander, 1958	18843	695	Equality Formation beyond Wedron Group	Michigan Subepisode	empty	Kankakee Torrent		Hajic	OK		18221	19611	1	0.682711	17606	20448	1421	0.954514	1
ISGS-7043	Cass	New Cottonwood School	Py-V of TOC	40.0236	-90.2906	15590	190	-25.7	unpublished	18840	202.5	Peoria Silt (Jules Geosol)	Michigan Subepisode	empty	soil organic carbon		MRAP	Questionable Date	Nash/Grimley	18641	19046	1	0.683332	18453	19337	442	0.95468	1
UCIAMS-150513	McHenry	Bryn Mawr IWLP, Woodstock	Dryas leaves, stems	42.2586	-88.4067	15560	60	ND	unpublished	18819	63	Barlina Moraine (Bryn Mawr IWLP)	Livingston Phase (min)	Barlina Subphase	middle Bryn Mawr	MRAP3-14-20 R3 80-90	MRAP	OK	Curry	18753	18879	1	0.684032	18674	18941	133.5	0.954847	1
UCIAMS-97042	McHenry	Bryn Mawr IWLP, Woodstock	Dryas leaves, stems	42.2568	-88.41360	15515	50	ND	unpublished	18776	59.5	Barlina Moraine (Bryn Mawr IWLP)	Livingston Phase (min)	Barlina Subphase	middle Bryn Mawr		ISGS	OK	Curry	18717	18836	1	0.683996	18646	18894	124	0.955137	1
ISGS-2744	Cass	Cottonwood School	snails	40.0264	-90.2917	15510	330	-24.3	Grimley et al., 1998	18773	374.5	Peoria Silt	Michigan Subepisode	empty	snail shells with secondary carbonate	CS1	ISGS	Questionable Date	Grimley	18409	19158	1	0.68291	18045	19569	762	0.954548	1
UCIAMS-26259	Kendall	Reservation Rd/Morgan Ck	stems, leaves, no Dryas	41.6376	-87.9074	15470	110	ND	Curry et al., 2014	18741	107.5	Equality Formation above Wedron Group	Michigan Subepisode	empty	Kankakee Torrent	#4 KC3 29.5-31.0cm .087mgC	ISGS	OK	Curry	18625	18840	1	0.68377	18502	18946	222	0.954884	1
ISGS-4193	Monroe	Fogelpole Cave	Py-V of SOC	38.1917	-90.1333	15420	190	-24.8	Panno et al., 2004	18699	193.5	unnamed unit	Michigan Subepisode	empty	cave	F98F3-Volatile	ISGS	OK	Panno/Wang	18489	18876	1	0.683158	18252	19109	428.5	0.954647	1
UCIAMS-124003	McHenry	Bryn Mawr IWLP, Woodstock	Dryas leaves, stems	42.2568	-88.4136	15415	45	-27.1	unpublished	18694	60	Barlina Moraine (Bryn Mawr IWLP)	Livingston Phase (min)	Barlina Subphase	middle Bryn Mawr	WOO-12-y_535-555	ISGS	OK	Curry	18628	18748	1	0.685846	18567	18795	114	0.954666	1
UCIAMS-124006	McHenry	Bryn Mawr IWLP, Woodstock	Dryas leaves, stems	42.2574	-88.4135	15380	60	-26.9	unpublished	18660	70.5	Barlina Moraine (Bryn Mawr IWLP)	Livingston Phase (min)	Barlina Subphase	middle Bryn Mawr	WOO-12-z_453-464	ISGS	OK	Curry	18588	18729	1	0.684845	18512	18791	139.5	0.955118	1
UCIAMS-97043	McHenry	Bryn Mawr IWLP, Woodstock	Dryas leaves, stems	42.2568	-88.41360	15370	60	ND	unpublished	18647	71.5	Barlina Moraine (Bryn Mawr IWLP)	Livingston Phase (min)	Barlina Subphase	middle Bryn Mawr		ISGS	OK	Curry	18578	18721	1	0.685631	18500	18784	142	0.955137	1
ISGS-331	Randolph	Clores Bridge	wood	37.897	-89.7603	15330	170	ND	Liu and Coleman, 1981	18613	177.5	base of Henry beyond Wedron	Michigan Subepisode	empty	slackwater		ISGS	OK		18417	18772	1	0.683532	18188	18931	371.5	0.954556	1
ISGS-6296	St Clair	Buddy Funk Rd/Kaskaskia R.	wood and needles	38.3678	-89.8017	15280	400	-27	unpublished	18552	441.5	Equality Formation beyond Wedron Group	Michigan Subepisode	empty	slackwater	NAE-7-27.5	ISGS	OK	Grimley	18054	18937	1	0.683205	17660	19504	922	0.954607	1
UCIAMS-153745	Livingston	Chatsworth Bog	Salix leaves, stems	40.676	-88.3231	15275	45	ND	unpublished	18547	70.5	Illiana Moraine	Hudson Episode	empty	kettle	66.7-66.9 ft	ISGS	OK	Curry	18481	18622	1	0.685783	18401	18689	144	0.954987	1
ISGS-4089	Pope	near mouth of Cache River valley	wood	37.3025	-88.5381	15270	120	-26.7	unpublished	18542	135	Equality Formation beyond Wedron Group	Michigan Subepisode	empty	slackwater	24532	ISGS	OK	Follmer	18404	18674	1	0.683031	18256	18796	270	0.954712	1
ISGS-465	Du Page	Mastodon site: NIU-123 (JWS-1)	peat	41.8478	-88.195	15240	120	ND	Liu et al., 1986	18517	137	Equality Formation above Wedron Group	Michigan Subepisode	empty	kettle		ISGS	Questionable Date		18369	18643	1	0.683941	18209	18771	281	0.954638	1
ISGS-4280	Alexander	Dongola	wood	37.3231	-89.2331	15230	110	-27.9	unpublished	18505	127.5	Equality Formation beyond Wedron Group	Michigan Subepisode	empty	slackwater	B-1	ISGS	OK	Nelson	18368	18623	1	0.682894	18224	18750	263	0.954619	1
UCIAMS-167000	Cook	STEG 15 20.0-21.5 ft	Salix leaves, stems	41.438	-87.719	15220	60	-27.2	Caron and Curry, 2016	18492	83.5	Westmont Moraine IWLP	Crown Point Phase (min)	Westmont Moraine	Dryas leaves, stems		ISGS	OK	Caron/Curry	18407	18574	1	0.683879	18325	18653	164	0.955023	1
ISGS-1849	La Salle	Tonica Kettle, TK4	wood	41.2231	-89.0786	15190	370	-26.7	Hansel and Johnson, 1996	18462	399	Equality Formation above Wedron Group	Hudson Episode	empty	kettle	about 1.56 m below datum	ISGS	OK	Hajic	18016	18814	1	0.683156	17598	19300	851	0.954557	1
ISGS-4440	Cass	Seaman Farm, Beardstown	Py-V of SOC	40.0096	-90.336456	15150	140	-24.4	unpublished	18420	170	Peoria Silt	Michigan Subepisode	empty	soil organic carbon	SF 14' volatile	ISGS	Questionable Date		18247	18587	1	0.682978	18049	18717	334	0.954673	1
UCIAMS-23773	DeKalb	Burlington IWLP	leaves, stems	42.0475	-88.6216	15150	45	ND	Curry 2008; Curry et al., 2010	18419	74.5	DeKalb Mounds IWLP	Michigan Subepisode	empty	DeKalb Mounds	API 23513; 13.8-14.4	ISGS	OK	Curry	18342	18491	1	0.683763	18266	18577	155.5	0.954894	1
UCIAMS-23768	Kane	Burlington IWLP	leaves, stems	42.0471	-88.5661	15125	45	ND	Curry 2008; Curry et al., 2010	18390	76.5	DeKalb Mounds IWLP	Michigan Subepisode	empty	DeKalb Mounds	API 35696; 268 cm depth	ISGS	OK	Curry	18314	18467	1	0.685043	18217	18558	170.5	0.954834	1
ISGS-179	Cass	Jules	organic carbon concentrated from clay	40.017	-90.275	15020	300	ND	Coleman and Liu, 1975	18280	327	Peoria Silt; Jules Geosol	Michigan Subepisode	empty	organic carbon concentrate		ISGS	Questionable Date		17938	18592	1	0.683395	17582	18889	653.5	0.954618	1
ISGS-1379	Fulton	Rice Lake	wood	40.487	-89.9406	15000	240	-26.1	Hansel and Johnson, 1996	18250	268.5	Equality Formation beyond Wedron Group	Michigan Subepisode	empty	Lake Calhoun		ISGS	OK		17970	18507	1	0.683513	17698	18755	528.5	0.954501	1
ISGS-2170	Adams	Lima	stems	40.1539	-91.375	14900	500	-29.5	Hansel and Johnson, 1996	18096	574	Equality Formation beyond Wedron Group	Michigan Subepisode	empty	Lake Calhoun	WOAK-3, 410-440	IAS	OK		17556	18704	1	0.682914	16882	19354	1236	0.95451	1
UCIAMS-46834	Cook	South Barrington	leaves, stems	42.072	-88.1904	14880	80	ND	Curry, 2015	18072	116.5	Valparaiso Moraine IWLP	Crown Point Phase (min)	Valparaiso MS (min)	Dryas leaves, stems	Higgins/Sutton #2 243	ISGS	OK	Curry	17977	18210	1	0.683899	17885	18321	218	0.954704	1
UCIAMS-26265	Cook	Crabtree Nature Center	Dryas leaves, stems	42.1132	-88.1608	14860	40	ND	Curry, 2015	18056	84	Valparaiso Moraine IWLP	Crown Point Phase (min)	Valparaiso MS (min)	Dryas leaves, stems	STR-05-01 698-716	ISGS	OK	Curry	17975	18143	1	0.682794	17901	18234	166.5	0.954554	1
ISGS-A0165	McHenry	Nancy Drive, Woodstock	leaves, stems	42.2326	-88.2855	14860	110	ND	Curry, 2015	18056	141.5	Equality Formation above Wedron Group	Michigan Subepisode	empty	kettle		ISGS	OK	Curry	17939	18222	1	0.683225	17810	18367	278.5	0.954812	1
Beta-207031	Fulton	Hajic (2007) EMQ-32	conifer wood, bark	40.344	-90.1029	14830	50	ND	Hajic et al., 2007	18029	87	Middle Illinois River Valley alluvium	Michigan Subepisode	empty	Lake Calhoun		Hajic	OK	Hajic	17942	18116	1	0.685046	17866	18215	174.5	0.954697	1
UCIAMS-46831	Cook	Crabtree Nature Center	leaves, stems	42.1135	-88.1608	14780	50	ND	Curry, 2015	17980	82.5	Valparaiso Moraine IWLP	Crown Point Phase (min)	Valparaiso MS (min)	Dryas leaves, stems	STR-05-01 439-451	ISGS	OK	Curry	17895	18060	1	0.683937	17815	18158	171.5	0.954597	1
AA-4680	Kane	Nelson Lake	needle	41.8328	-88.381	14780	150	ND	Curry et al., 2001	17980	192	Equality Formation above Wedron Group	Hudson Episode	empty	kettle		ISGS/ISM	OK	Curry/Grimm	17806	18190	1	0.683176	17616	18358	371	0.954582	1
UCIAMS-97044	McHenry	Bryn Mawr IWLP, Woodstock	Dryas leaves, stems	42.2568	-88.41360	14690	70	ND	unpublished	17893	105	Barlina Moraine (Bryn Mawr IWLP)	Livingston Phase (min)	Barlina Subphase	upper Bryn Mawr		ISGS	OK	Curry	17776	17986	1	0.684629	17660	18073	206.5	0.954891	1
ISGS-4437	Cass	Seaman Farm, Beardstown	Py-V of SOC	40.0096	-90.336456	14650	170	-17.8	unpublished	17850	204	Peoria Silt	Michigan Subepisode	empty	soil organic carbon	SF 2.7-3.0'	ISGS	Questionable Date		17617	18025	1	0.682711	17435	18278	421.5	0.954526	1
ISGS-A0143	McHenry	Nancy Drive, Woodstock	leaves, stems	42.2326	-88.2855	14610	110	ND	Curry, 2015	17808	137.5	Equality Formation above Wedron Group	Hudson Episode	empty	kettle		ISGS	OK		17650	17925	1	0.683125	17506	18053	273.5	0.954536	1
ISGS-1285	Morgan	Meredosia Village Levee	wood, bark, plant debris, and needles	39.8194	-90.5167	14590	240	-27.3	Liu et al., 1992	17767	290.5	Equality Formation beyond Wedron Group	Michigan Subepisode	empty	Lake Calhoun	; 9BD, 7.1-7.15	Hajic	OK	Hajic	17471	18052	1	0.682941	17145	18354	604.5	0.954518	1
UCIAMS-124005	McHenry	Bryn Mawr IWLP, Woodstock	Dryas leaves, stems	42.2574	-88.4135	14580	50	-26.4	unpublished	17746	94.5	Barlina Moraine (Bryn Mawr IWLP)	Livingston Phase (min)	Barlina Subphase	upper Bryn Mawr	WOO-12-z_352-361	ISGS	OK	Curry	17668	17857	1	0.684872	17587	17943	178	0.954555	1
Beta-210774	Fulton	Hajic (2007) EMQ-49	wood, bark, needles	40.343	-90.0877	14560	60	ND	Hajic et al., 2007	17720	102	Equality Formation beyond Wedron Group	Michigan Subepisode	empty	Lake Calhoun		Hajic	OK	Hajic	17640	17844	1	0.68499	17552	17938	193	0.955071	1
CAMS-70485	Kane	Nelson Lake	needle	41.8328	-88.381	14540	110	ND	Curry et al., 2001	17700	141.5	Equality Formation above Wedron Group	Hudson Episode	empty	kettle		ISGS/ISM	OK	Curry/Grimm	17580	17863	1	0.684122	17440	17989	274.5	0.954678	1
UCIAMS-124001	McHenry	Bryn Mawr IWLP, Woodstock	Dryas leaves, stems	42.2568	-88.4136	14490	60	ND	unpublished	17645	107	Barlina Moraine (Bryn Mawr IWLP)	Livingston Phase (min)	Barlina Subphase	upper Bryn Mawr	WOO-12-y_321-328	ISGS	OK	Curry	17552	17766	1	0.683888	17472	17883	205.5	0.955008	1
ISGS-2024	Clark	Martinsville	twigs	39.375	-87.9042	14490	140	-26	Hansel and Johnson, 1996	17645	176.5	Equality above Glasford	Michigan Subepisode	empty	slackwater	11.2-12.0 ft	ISGS	OK	Curry	17494	17847	1	0.682738	17274	17996	361	0.95461	1
Beta-207033	Fulton	Hajic (2007) EMQ-33	wood, bark, needles	40.3346	-90.1032	14440	50	ND	Hajic et al., 2007	17592	91	Middle Illinois River Valley alluvium	Michigan Subepisode	empty	Lake Calhoun		Hajic	OK	Hajic	17501	17683	1	0.68446	17423	17829	203	0.954567	1
UCIAMS-26264	Lake	Mill Valley	Dryas leaves, stems	42.4442	-87.9737	14420	40	ND	Curry, 2015	17563	79.5	Tinley Moraine IWLP	Crown Point Phase (min)	Tinley Moraine (min)	Dryas leaves, stems	#14 W5 22.65-22.80cm .39mgC	ISGS	OK	Curry	17490	17649	1	0.685031	17400	17775	187.5	0.954605	1
UCIAMS-110614	McHenry	Bryn Mawr IWLP, Woodstock	Dryas leaves, stems	42.2568	-88.4136	14410	40	-26.4	unpublished	17552	78.5	Barlina Moraine (Bryn Mawr IWLP)	Livingston Phase (min)	Barlina Subphase	upper Bryn Mawr	WOO 11_03 12.8-13.2	ISGS	OK	Curry	17481	17638	1	0.68503	17376	17746	185	0.954509	1
UCIAMS-124002	McHenry	Bryn Mawr IWLP, Woodstock	Dryas leaves, stems	42.2568	-88.4136	14410	40	ND	unpublished	17552	78.5	Barlina Moraine (Bryn Mawr IWLP)	Livingston Phase (min)	Barlina Subphase	upper Bryn Mawr	WOO-12-y_390-400	ISGS	OK	Curry	17481	17638	1	0.68503	17376	17746	185	0.954509	1
UCIAMS-124004	McHenry	Bryn Mawr IWLP, Woodstock	Dryas leaves, stems	42.2574	-88.4135	14410	50	-26.7	unpublished	17552	87	Barlina Moraine (Bryn Mawr IWLP)	Livingston Phase (min)	Barlina Subphase	upper Bryn Mawr	WOO-12-z_295-306	ISGS	OK	Curry	17473	17647	1	0.683994	17364	17775	205.5	0.954509	1
ISGS-1851	La Salle	Tonica Kettle, RG2	wood	41.2231	-89.0786	14390	430	-26	Hansel and Johnson, 1996	17537	558	Equality Formation above Wedron Group	Hudson Episode	empty	kettle	about 1.48 m below datum	ISGS	OK		16939	18055	1	0.683052	16354	18552	1099	0.954571	1
ISGS-527	Livingston	Chatsworth Bog	bulk sediment	40.676	-88.323	14380	150	ND	King, 1986; Grimm et al., 2009	17530	211.5	Equality	Michigan Subepisode	empty	gyttja/bulk sediment	1250–1260	ISM	Questionable Date	Nelson	17307	17730	1	0.682945	17108	17912	402	0.954812	1
Beta-210773	Fulton	Hajic (2007) EMQ-42	wood, bark, leaves, seeds	40.3576	-90.0872	14380	80	ND	Hajic et al., 2007	17530	121	Middle Illinois River Valley alluvium	Michigan Subepisode	empty	Lake Calhoun		Hajic	OK	Hajic	17407	17649	1	0.683254	17251	17799	274	0.954724	1
UCIAMS-152191	Ford	Lake Sibley	needle	40.5909	-88.3831	14350	60	ND	unpublished	17501	100	Illiana Moraine	Hudson Episode	empty	kettle	Lake Sibley 12.3 488-494	ISGS	OK		17395	17595	1	0.68307	17250	17686	218	0.95489	1
ISGS-1550	Kane	Elgin Bog	wood	42.0457	-88.2439	14330	250	-25.9	Hansel and Johnson, 1992, 1996	17476	332.5	Equality Formation above Wedron Group	Hudson Episode	empty	kettle		ISGS	OK	Hansel	17114	17779	1	0.683026	16711	18064	676.5	0.954616	1
ISGS-1263	Scott	Meredosia Lake Levee	wood, bark, plant debris, and needles	39.8197	-90.5194	14300	290	-26.9	Liu et al., 1992	17441	387	Equality Formation beyond Wedron Group	Michigan Subepisode	empty	Lake Calhoun	DLC 12AF, 3.4-3.65	Hajic	OK		17029	17803	1	0.683253	16554	18122	784	0.954529	1
ISGS-1829	La Salle	Tonica Kettle, TK1	wood	41.2231	-89.0786	14290	110	-24.4	Hansel and Johnson, 1996	17428	163	Equality Formation above Wedron Group	Hudson Episode	empty	shallow kettle	about 1.31 m below datum	ISGS	OK		17235	17561	1	0.683706	17066	17718	326	0.95475	1
UCIAMS-53186	Kane	Mastodon Lake core	needle	41.741	-88.2974	14185	50	ND	unpublished	17250	107.5	Equality Formation above Wedron Group	Hudson Episode	empty	kettle	760 cm	ISGS/ISM	OK	Grimm/Curry	17167	17382	1	0.684546	17083	17476	196.5	0.955114	1
CAMS-70484	Kane	Nelson Lake	needle	41.8328	-88.381	14180	200	ND	Curry et al., 2001	17250	281.5	Equality Formation above Wedron Group	Hudson Episode	empty	kettle		ISGS/ISM	OK	Curry/Grimm	16978	17541	1	0.683077	16638	17807	584.5	0.954508	1
UCIAMS-63074	Kane	Mastodon Lake core	needle	41.741	-88.2974	14165	35	ND	unpublished	17240	97	Equality Formation above Wedron Group	Hudson Episode	empty	kettle	774 cm	ISGS/ISM	OK	Grimm/Curry	17147	17341	1	0.68446	17080	17437	178.5	0.955124	1
UCIAMS-159239	Cook	PC-4 9.8-10.4	needle	41.4904	-87.5342	14140	50	-26.8	Bruegger, 2016	17192	109.5	Equality Formation above Wedron Group	Crown Point Phase (min)	Tinley Moraine (min)	Dryas leaves, stems		ISGS	OK		17100	17319	1	0.683337	17013	17434	210.5	0.954685	1
ISGS-5655	Kane	Mastodon Lake, main cut	wood	41.7386	-88.2954	14130	70	-25.1	unpublished	17188	129.5	Equality Formation above Wedron Group	Hudson Episode	empty	kettle		ISGS	OK		17071	17330	1	0.683373	16956	17459	251.5	0.95462	1
UCIAMS-63073	Kane	Mastodon Lake core	needle	41.741	-88.2974	14120	35	ND	unpublished	17176	97.5	Equality Formation above Wedron Group	Hudson Episode	empty	kettle	718.5 cm	ISGS/ISM	OK	Grimm/Curry	17079	17274	1	0.684964	17008	17393	192.5	0.954807	1
UCIAMS-26263	Lake	Mill Valley	Dryas leaves, stems	42.4442	-87.9737	14110	35	ND	Curry, 2015	17160	96.5	Tinley Moraine IWLP	Crown Point Phase (min)	Tinley Moraine (min)	Dryas leaves, stems	#11 W5 12.6-12.85cm	ISGS	OK	Curry	17064	17257	1	0.684528	16991	17383	196	0.95503	1
UCIAMS-159236	Cook	PC-2 12.4-12.8	rootlets	41.4904	-87.5342	14115	50	-25.8	Bruegger, 2016	17160	111	Equality Formation above Wedron Group	Crown Point Phase (min)	Tinley Moraine (min)	Dryas leaves, stems		ISGS	OK		17061	17283	1	0.684477	16972	17408	218	0.95471	1
UCIAMS-30986	Livingston	Chatsworth Bog	needle, seed	40.676	-88.323	14110	60	ND	Grimm et al., 2009	17160	121	Equality Formation above Wedron Group	Hudson Episode	empty	kettle	1466–1470	ISM	OK	Nelson	17046	17288	1	0.683906	16943	17422	239.5	0.954724	1
UCIAMS-30986	Livingston	Chatsworth Bog	needle	40.6761	-88.7845	14110	60	ND	Grimm et al., 2009	17160	121	Chatsworth Moraine	Hudson Episode	empty	kettle		ISM	OK	Curry	17046	17288	1	0.683906	16943	17422	239.5	0.954724	1
ISGS-1570	Cook	Lynwood Reservoir	wood	41.5042	-87.5417	14100	640	-25.8	Hansel and Mickelson, 1988	17120	836	Dolton facies, Henry Fm (Glenwood Beach)	Glenwood I Phase	Lake Chicago	littoral		ISGS	OK		16260	17932	1	0.682915	15396	18741	1672.5	0.954545	1
UCIAMS-159237	Cook	PC-2 12-12.8	rootlets	41.4904	-87.5342	14085	45	-25.6	Bruegger, 2016	17104	102	Equality Formation above Wedron Group	Crown Point Phase (min)	Tinley Moraine (min)	Dryas leaves, stems		ISGS	OK	Curry	17022	17226	1	0.683792	16933	17375	221	0.954567	1
UCIAMS-159235	Cook	PC-2 12.0-12.4	rootlets	41.4904	-87.5342	14075	50	-25.7	Bruegger, 2016	17090	106	Equality Formation above Wedron Group	Crown Point Phase (min)	Tinley Moraine (min)	Dryas leaves, stems		ISGS	OK	Curry	17005	17217	1	0.683081	16899	17371	236	0.954671	1
UCIAMS-26262	Lake	Mill Valley	Dryas leaves, stems	42.4442	-87.9737	14070	40	ND	Curry, 2015	17087	94	Tinley Moraine IWLP	Crown Point Phase (min)	Tinley Moraine (min)	Dryas leaves, stems	#8 W5 11.6-12.0cm .4mgC	ISGS	OK	Curry	17010	17198	1	0.683286	16911	17351	220	0.954799	1
UCIAMS-159240	Cook	PC-4 13-13.6	rootlets	41.4904	-87.5342	14050	45	-26.4	Bruegger, 2016	17069	98	Equality Formation above Wedron Group	Crown Point Phase (min)	Tinley Moraine (min)	Dryas leaves, stems		ISGS	OK	Curry	16980	17176	1	0.684624	16850	17322	236	0.954876	1
ISGS-2111	De Kalb	De Kalb Water Tower	wood	41.9554	-88.7687	14050	150	-25.7	Hansel and Johnson, 1996	17069	243.5	Equality above Tiskilwa	Hudson Episode	empty	kettle		ISGS	OK	NIU	16846	17333	1	0.68299	16582	17514	466	0.954607	1
ISGS-69	Champaign	Parkland College	peat	40.1342	-88.287	13980	200	ND	Coleman, 1973	16998	313	Equality Formation above Wedron Group	Hudson Episode	empty	kettle		ISGS	OK	Johnson	16641	17267	1	0.682804	16352	17526	587	0.954642	1
CAMS-81854	Kane	Tyler Creek/Randall Rd, Elgin	needle	42.0572	-88.3376	13980	40	ND	Curry, 2007	16998	101.5	Equality Formation above Wedron Group	Michigan Subepisode	empty	slackwater		ISGS	OK	Curry	16877	17080	1	0.682992	16735	17169	217	0.954923	1
ISGS-2119	Fulton	near Goose Lake	wood and nutshell	40.4333	-89.9722	13930	660	-25.4	Hansel and Johnson, 1996	16930	884.5	Equality Formation beyond Wedron Group	Michigan Subepisode	empty	Lake Calhoun (?)	C-026	Bareis	OK	Bareis	16028	17797	1	0.682827	15128	18674	1773	0.954505	1
UCIAMS-46835	Cook	South Barrington	leaves, stems	42.072	-88.1904	13910	45	ND	Curry, 2015	16910	117	Valparaiso Moraine IWLP	Crown Point Phase (min)	Valparaiso MS (min)	Dryas leaves, stems	Higgins/Sutton #3 150	ISGS	OK	Curry	16757	16991	1	0.682951	16608	17057	224.5	0.954521	1
UCIAMS-63076	Lake	Wadsworth Village Hall	Dryas leaves, stems	42.4279	-87.9072	13910	35	ND	Curry and Petras, 2011	16910	108.5	Deerfield IWLP	Crown Point Phase (min)	Deerfield Moraine (Lake Border MS)	Dryas leaves, stems		ISGS	OK	Curry	16767	16984	1	0.683763	16625	17042	208.5	0.955018	1
ISGS-1649	Cook	Centennial Park Res., Tinley Park	wood	41.5874	-87.8029	13890	120	-25.2	Hansel and Johnson, 1992	16840	204	Equality Formation above Wedron Group	Hudson Episode	empty	kettle		ISGS	OK	Hansel/Johnson	16624	17032	1	0.683551	16400	17214	407	0.954748	1
ISGS-1549	Cook	Lynwood Reservoir	wood	41.5042	-87.5417	13870	170	-24.8	Hansel and Mickelson, 1988	16820	269.5	Dolton facies, Henry Fm (Glenwood Beach)	Glenwood I Phase	Lake Chicago	littoral		ISGS	OK	Hansel/Mickelson	16527	17066	1	0.683465	16287	17336	524.5	0.954566	1
CAMS-105798	Du Page	Brewster Creek	needle	41.9835	-88.2537	13870	60	ND	Curry et al., 2007	16820	136	Equality Formation above Wedron Group	Hudson Episode	empty	kettle	Brewster Ck core 828	ISGS	OK	Curry/Grimm	16672	16944	1	0.684152	16530	17038	254	0.954736	1
CAMS-18871	Kane	Lukens/Darnell, Hampshire	wood	42.0289	-88.6102	13870	40	ND	Curry, 2008	16820	120	Equality Formation above Wedron Group	Hudson Episode	empty	kettle		ISGS	OK	Curry	16689	16929	1	0.684892	16573	17008	217.5	0.954588	1
C-535	La Salle	Wedron Quarry	wood	41.42	-88.78	13842	780	ND	Arnold and Libby, 1951	16720	1065	Peddicord Tongue, Equality Fm	Farmdale Phase	empty	lacustrine		University of Chicago	Questionable Date		15737	17866	1	0.682831	14456	18828	2186	0.954509	1
ISGS-1919	La Salle	Tonica Kettle, RG2	wood	41.2231	-89.0786	13840	250	-25.7	Hansel and Johnson, 1996	16720	369.5	Equality Formation above Wedron Group	Hudson Episode	empty	kettle	about 1 m below datum	ISGS	OK	Hajic	16369	17108	1	0.683307	16080	17491	705.5	0.954597	1
UCIAMS-159238	Cook	PC-4 9.3-9.5	needle	41.4904	-87.5342	13790	50	ND	unpublished	16680	132	Equality Formation above Wedron Group	Glenwood I Phase	Lake Chicago	lagoon		ISGS	OK	Bruegger/Curry	16545	16809	1	0.682883	16433	16933	250	0.954784	1
CAMS-105797	Du Page	Brewster Creek	needle	41.9835	-88.2537	13750	40	ND	Curry et al., 2007	16580	123.5	Equality Formation above Wedron Group	Hudson Episode	empty	kettle	Brewster Ck core 772	ISGS	OK	Curry/Grimm	16486	16733	1	0.683154	16379	16854	237.5	0.954551	1
UCIAMS-76211	Kane	Mastodon Lake core	needle, seed	41.741	-88.2974	13735	45	ND	unpublished	16564	127.5	Equality Formation above Wedron Group	Hudson Episode	empty	kettle	657.5	ISGS/ISM	OK	Grimm/Curry	16453	16708	1	0.68346	16349	16835	243	0.954938	1
ISGS-5656	Kane	Mastodon Lake, main cut	wood	41.2964	-88.2892	13710	70	-25	unpublished	16560	148.5	Equality Formation above Wedron Group	Hudson Episode	empty	kettle	C4#5	ISGS	OK	Curry	16383	16680	1	0.682853	16286	16852	283	0.954852	1
ISGS-1920	La Salle	Tonica Kettle, RG1	wood	41.2231	-89.0786	13730	160	-25.6	Hansel and Johnson, 1996	16560	253.5	Equality Formation above Wedron Group	Hudson Episode	empty	kettle	about 1 m below datum	ISGS	OK	Hajic	16332	16839	1	0.683256	16136	17095	479.5	0.954679	1
ISGS-1531	Calhoun	near Bundy Lake	wood, bark, needles, debris	38.947	-90.5575	13710	270	-25.4	Hajic, 1991	16560	391	Equality Formation beyond Wedron Group	Michigan Subepisode	empty	Lake Calhoun	Savanna Terrace	Hajic	OK	Hajic	16199	16981	1	0.682824	15846	17399	776.5	0.954593	1
UCIAMS-63075	Lake	Wadsworth Village Hall	Dryas leaves, stems	42.4279	-87.9072	13695	40	ND	Curry and Petras, 2011	16540	115	Deerfield IWLP	Crown Point Phase (min)	Deerfield Moraine (Lake Border MS)	Dryas leaves, stems		ISGS	OK	Curry	16392	16622	1	0.683958	16313	16765	226	0.954638	1
ISGS-7087	Cook	Plum Creek (Bretz outcrop)	wood	41.4767	-87.5332	13700	80	-24.6	Bruegger, 2016	16540	157	Equality Formation above Wedron Group	Glenwood I Phase	Lake Chicago	lagoon		ISGS	OK	Bruegger/Curry	16359	16673	1	0.683495	16259	16860	300.5	0.954839	1
I-1720	Henderson	Bald Bluff	terrestrial snail shells	41.0018	-90.8534	13700	260	ND	Frye et al., 1968	16540	378.5	Peoria Silt	Michigan Subepisode	empty	snail shells with secondary carbonate	4 to 5 ft deep in 25 ft high section of loess	ISGS	Questionable Date		16199	16956	1	0.683191	15855	17362	753.5	0.954521	1
ISGS-6444	Randolph	Ruma	Fresh water clam shell fragments	38.1319	-89.9447	13700	90	-12.9	unpublished	16540	168.5	Equality Formation beyond Wedron	Michigan Subepisode	empty	biogenic carbonate; secondary carbonate?	RBD-3f	ISGS	Questionable Date	Grimley	16350	16687	1	0.683803	16245	16884	319.5	0.9546	1
UCIAMS-159242	Cook	PC-5 6.55-6.75	needle	41.4931	-87.5417	13675	45	ND	Bruegger, 2016	16450	114.5	Equality Formation above Wedron Group	Glenwood I Phase	Lake Chicago	lagoon		ISGS	OK	Bruegger/Curry	16363	16592	1	0.68314	16278	16738	230	0.954817	1
ISGS-4131	Madison	Keller Farm, Glen Carbon	Py-V of SOC	38.7484	-90.0028	13670	340	-24.8	Wang et al. 2003b	16450	487.5	Peoria Silt	Michigan Subepisode	empty	soil organic carbon	3.05; Keller Farm PyV	ISGS	Questionable Date	Wang	16054	17029	1	0.682712	15596	17541	972.5	0.954558	1
ISGS-2054	Kane	Sleepy Hollow oxbow	leaves, stems	42.0932	-88.3156	13670	140	-28.1	Curry et al., 1999	16450	223	Cahokia Formation	Michigan Subepisode	empty	slackwater		ISGS	OK	Curry	16270	16716	1	0.682858	16109	16970	430.5	0.954669	1
ISGS-5633	Kane	Mastodon Lake, main cut	wood	41.2964	-88.2892	13660	70	-24.9	unpublished	16442	135	Equality Formation above Wedron Group	Michigan Subepisode	empty	kettle	Trench #1	ISGS	OK	Curry	16325	16595	1	0.683188	16228	16770	271	0.954822	1
AA-105157	Henry	IL.124.Kewanee	Mammuthus	41.4314	-89.9096	13660	110	-22	Widga et al., 2017	16441	182.5	Equality Formation above Wedron Group	Hudson Episode	empty	kettle		ISM	OK	Widga	16285	16650	1	0.682819	16161	16884	361.5	0.954554	1
UCIAMS-46829	Lake	Wadsworth Village Hall	Dryas leaves, stems	42.4279	-87.9072	13650	40	ND	Curry and Petras, 2011	16430	105.5	Deerfield IWLP	Crown Point Phase (min)	Deerfield Moraine (Lake Border MS)	Dryas leaves, stems		ISGS	OK	Curry	16337	16548	1	0.683823	16255	16670	207.5	0.954744	1
ISGS-3708	Kane	Fermilab	wood,cones	41.8444	-88.2814	13620	220	-26.1	unpublished	16372	328	Equality Formation above Wedron Group	Michigan Subepisode	empty	kettle	NS1-4	ISGS	OK	Curry	16123	16779	1	0.682915	15824	17115	645.5	0.954632	1
ISGS-6068	McHenry	Rush Creek	wood	42.4	-88.6	13600	70	-23.7	unpublished	16357	124.5	Equality Formation above Wedron Group	Michigan Subepisode	empty	kettle	1	ISGS	OK	Simpson	16260	16509	1	0.683223	16157	16663	253	0.954809	1
ISGS-2081	Kane	Biddle Farm	bulk sediment	41.9232	-88.4463	13590	230	-29.2	Hansel and Johnson, 1996	16344	342	Equality Formation above Wedron Group	Michigan Subepisode	empty	kettle	MAG-2,BF-10	ISM	OK	Graham	16067	16751	1	0.683146	15760	17108	674	0.954584	1
ISGS-4367	McHenry	Crystal Lake	wood	42.2344	-88.3539	13560	90	-25.7	Gonzales and Grimm, 2009	16304	146	Equality Formation above Wedron Group	Hudson Episode	empty	kettle	2169-2175cm	ISGS	OK	Curry	16192	16484	1	0.683679	16056	16657	300.5	0.954716	1
OxAW864-16	McHenry	Crystal Lake	wood	42.2344	-88.3539	13535	125	ND	Gonzales and Grimm, 2009	16289	190.5	Equality Formation above Wedron Group	Hudson Episode	empty	kettle	2238.5	ISM/ISGS	OK	Curry	16118	16499	1	0.68352	15936	16736	400	0.954727	1
ISGS-2079	Kane	Biddle Farm	wood	42.0066	-88.4491	13530	100	-26	Hansel and Johnson, 1996	16284	158	Equality above Wedron; vertebrate site	Hudson Episode	empty	kettle		ISGS	OK	Graham	16139	16455	1	0.683815	15994	16644	325	0.954707	1
ISGS-4138	Madison	Keller Farm, Glen Carbon	Py-R of SOC	38.7484	-90.0028	13510	120	-25.9	Wang et al. 2003b	16269	182.5	Peoria Silt	Michigan Subepisode	empty	soil organic carbon	KF-B-38; 1.55; Keller Farm PyR	ISGS	Questionable Date	Wang	16087	16452	1	0.683625	15908	16668	380	0.954653	1
ISGS-1921	La Salle	Tonica Kettle, WS2	wood	41.2231	-89.0786	13480	220	-25.7	Hansel and Johnson, 1996	16211	325	Equality Formation above Wedron Group	Hudson Episode	empty	kettle	about 1 m below datum	ISGS	OK	Grimm/Curry	15916	16566	1	0.683095	15633	16964	665.5	0.954572	1
UCIAMS-152221	Lake	Riggle Pond, Oak Ridge Prairie Co. Pk., IN	wood	41.5142	-87.3781	13450	50	ND	Bruegger, 2016	16185	89.5	Equality Formation above Wedron Group	Glenwood II Phase	Lake Chicago	lagoon	Riggle Pond RP-R5_909-925	ISGS	OK	Bruegger/Curry	16094	16273	1	0.683064	15982	16376	197	0.954518	1
ISGS-334	Logan	Rhoads	wood	40.167	-89.417	13440	250	ND	Liu and Coleman, 1981	16164	369	base of Cahokia beyond Wedron	Michigan Subepisode	empty	alluvium		ISGS	OK	Abbott	15814	16552	1	0.683031	15440	16974	767	0.95463	1
OxAW864-13	McHenry	Crystal Lake	needle	42.2344	-88.3539	13430	125	ND	Gonzales and Grimm, 2009	16153	181	Equality Formation above Wedron Group	Hudson Episode	empty	kettle	2172 cm	ISM/ISGS	OK	Curry	15975	16337	1	0.682948	15792	16550	379	0.954754	1
ISGS-894	Jersey	Nutwood Levee	wood	39.15	-90.5575	13390	190	-26.7	Liu et al., 1986; Hajic, 1983	16124	274	Equality Formation beyond Wedron Group	Michigan Subepisode	empty	Lake Calhoun		Hajic	OK	Hajic	15821	16369	1	0.683501	15551	16742	595.5	0.954629	1
OxAW864-14	McHenry	Crystal Lake	wood	42.2344	-88.3539	13380	125	ND	Gonzales and Grimm, 2009	16120	177.5	Equality Formation above Wedron Group	Hudson Episode	empty	kettle	2222	ISM/ISGS	OK	Curry	15916	16271	1	0.683073	15737	16481	372	0.954708	1
ISGS-875	Greene	Koster (North Field)	wood, bark	39.2083	-90.55	13360	100	-25.8	Liu et al., 1992; Wiant et al., 1983	16084	147	Equality Formation beyond Wedron Group	Michigan Subepisode	empty	Lake Calhoun		Hajic	OK		15928	16222	1	0.68427	15760	16353	296.5	0.954699	1
ISGS-1262	Morgan	Meredosia Village Levee; MLC 34, 3.19-3.77	wood, bark, plant debris, and needles	39.8444	-90.5139	13360	240	-27.4	Liu et al., 1992	16084	352.5	Equality Formation beyond Wedron Group	Michigan Subepisode	empty	Lake Calhoun		Hajic	OK	Hajic	15720	16425	1	0.68307	15330	16802	736	0.954634	1
UCIAMS-159244	Cook	DYER 2 ST3 15	needle	41.4785	-87.5325	13355	50	ND	Bruegger, 2016	16077	97	Equality Formation above Wedron Group	Glenwood II Phase	Lake Chicago	lagoon		ISGS	OK		15976	16170	1	0.684208	15870	16252	191	0.954688	1
ISGS-1284	Morgan	Meredosia Village Levee; MLC 24BD, 4.4-4.5	wood, bark, plant debris, and needles	39.8055	-90.5278	13340	180	-27.5	Liu et al., 1992	16054	254	Equality Formation beyond Wedron Group	Michigan Subepisode	empty	Lake Calhoun		Hajic	OK	Hajic	15780	16288	1	0.682707	15472	16602	565	0.954665	1
ISGS-426	Henry	Geneseo Landfill	wood	41.478	-90.156	13300	240	ND	Liu and Coleman, 1981	16016	352.5	Parkland Sand	Michigan Subepisode	empty	alluvium		ISGS	OK		15629	16334	1	0.683113	15262	16704	721	0.954512	1
ISGS-1634	Du Page	Elgin Bog	wood	42.0457	-88.2439	13290	500	-25	Hansel and Johnson, 1996	15993	763.5	Equality Formation above Wedron Group	Hudson Episode	empty	bog bottom		ISGS	OK	Hansel	15222	16749	1	0.682958	14315	17459	1572	0.954571	1
CAMS-81853	Kane	Tyler Creek/Randall Rd, Elgin	needle	42.0572	-88.3376	13290	70	ND	Curry, 2007	15993	118.5	Equality Formation above Wedron Group	Michigan Subepisode	empty	slackwater		ISGS	OK	Curry	15860	16097	1	0.683225	15753	16209	228	0.955016	1
UCIAMS-156033	Lake	Riggle Pond, Oak Ridge Prairie Co. Pk., IN	needle	41.5142	-87.3781	13275	35	ND	Bruegger, 2016	15972	88	Equality Formation above Wedron Group	Glenwood II Phase	Lake Chicago	lagoon	Riggle Pond RP-1 R3 700-710	ISGS	OK	Bruegger/Curry	15875	16051	1	0.683627	15781	16122	170.5	0.955011	1
UCIAMS-152222	Lake	Riggle Pond, Oak Ridge Prairie Co. Pk., IN	needle	41.5142	-87.3781	13260	60	ND	Bruegger, 2016	15949	107.5	Equality Formation above Wedron Group	Glenwood II Phase	Lake Chicago	lagoon	Riggle Pond RP-R5_909-925	ISGS	OK	Bruegger/Curry	15833	16048	1	0.683386	15733	16149	208	0.954521	1
ISGS-6663	Mason	Manito Sand Pit	Py-V of SOC	40.3762	-89.9065	13240	200	-23	Wang et al., 2012	15903	293.5	Equality Formation beyond Wedron Group	Michigan Subepisode	empty	slackwater		ISGS	OK	Wang	15621	16208	1	0.683119	15283	16472	594.5	0.954647	1
CAMS-103621	Livingston	Chatsworth Bog	needle, seed	40.676	-88.323	13180	140	ND	Grimm et al., 2009	15817	217	Equality Formation above Wedron Group	Hudson Episode	empty	kettle	1389–1393	ISM	OK	Nelson	15620	16054	1	0.683045	15348	16215	433.5	0.954609	1
UCIAMS-38371	McHenry	Crystal Lake	wood	42.2344	-88.3539	13175	30	ND	Gonzales and Grimm, 2009	15810	82.5	Equality Formation above Wedron Group	Hudson Episode	empty	kettle	2161–2164	ISM/ISGS	OK	Curry	15747	15912	1	0.682939	15684	16004	160	0.955234	1
UCIAMS-159241	Cook	PC-5 5.45-5.65	needle	41.4931	-87.5417	13150	45	ND	Bruegger, 2016	15797	95.5	Equality Formation above Wedron Group	Glenwood II Phase	Lake Chicago	lagoon		ISGS	OK	Curry	15703	15894	1	0.683392	15613	16004	195.5	0.954779	1
ISGS-6661	Mason	Manito Sand Pit	Py-R of SOC	40.3762	-89.9065	13150	140	-23.5	Wang et al., 2012	15797	224	Equality Formation beyond Wedron Group	Michigan Subepisode	empty	slackwater		ISGS	OK	Wang	15574	16022	1	0.683136	15315	16174	429.5	0.954632	1
ISGS-485	Du Page	Mastodon site: NIU-123	mastodon bone (untreated)	41.8478	-88.195	13130	350	ND	Liu et al., 1986	15757	520.5	Equality above Wedron	Hudson Episode	empty	gyttja		ISGS	Questionable Date		15212	16253	1	0.683134	14519	16879	1180	0.954535	1
ISGS-2804	Champaign	Champaign	wood	40.0833	-88.3083	13130	100	-25.4	Hansel and Johnson, 1996	15757	173	Equality Formation above Wedron Group	Michigan Subepisode	empty	kettle	CR-1	ISGS	OK	Stiff	15597	15943	1	0.683826	15371	16065	347	0.954515	1
ISGS-6525	Randolph	Kaskaskia R./S. Prairie	wood	38.1322	-89.9447	13100	100	-24.7	unpublished	15726	181	Equality Formation beyond Wedron Group	Michigan Subepisode	empty	slackwater	RBD-3f	ISGS	OK	Grimley	15541	15903	1	0.683028	15336	16023	343.5	0.9548	1
ISGS-1831	Cook	Deer Grove Bog	peat	42.1396	-88.0979	13090	120	-25.5	Hansel and Johnson, 1996	15714	208.5	Equality Formation above Wedron Group	Hudson Episode	empty	bog bottom		ISGS	OK	Hansel	15478	15895	1	0.683728	15294	16051	378.5	0.954551	1
ISGS-80	Macon	RMM-1	peat	39.845	-88.767	13090	110	ND	Coleman, 1973	15714	196	Henry Formation, above Wedron	Michigan Subepisode	empty	outwash		ISGS	OK		15495	15887	1	0.683359	15310	16030	360	0.954866	1
Beta-207030	Fulton	Emiquon Wildlife Area	needles, wood, bark	40.3431	-90.0909	13080	40	ND	Hajic et al., 2007	15701	97	Middle Illinois River Valley alluvium	Michigan Subepisode	empty	Lake Calhoun	Hajic (2007) EMQ-30	Hajic	OK	Hajic	15598	15792	1	0.68401	15441	15897	228	0.954672	1
Beta-207030	Fulton	Emiquon Wildlife Area	conifer wood, single piece	40.3431	-90.0968	12430	40	ND	Hajic et al., 2007	15701	97	Middle Illinois River Valley alluvium	Michigan Subepisode	empty	Lake Calhoun	Hajic (2007) EMQ-31	Hajic	OK	Hajic	15598	15792	1	0.68401	15441	15897	228	0.954672	1
Beta-207030	Fulton	Emiquon Wildlife Area	diffuse porous wood fragments	40.3486	-90.1046	11720	140	ND	Hajic et al., 2007	15701	97	Middle Illinois River Valley alluvium	Michigan Subepisode	empty	Lake Calhoun	Hajic (2007) EMQ-34	Hajic	OK	Hajic	15598	15792	1	0.68401	15441	15897	228	0.954672	1
ISGS-2547	Kane	Sleepy Hollow	peat	42.0931	-88.3155	13080	110	-28.3	Curry, 2005	15701	196	Cahokia Formation	Michigan Subepisode	empty	slackwater	KCM-6	ISGS	OK	Trask	15473	15865	1	0.682981	15301	16017	358	0.954585	1
UCIAMS-159243	Cook	DYER 2 ST 3 20-40	needle	41.4785	-87.5325	13065	45	ND	Bruegger, 2016	15666	107	Equality Formation above Wedron Group	Glenwood II Phase	Lake Chicago	lagoon		ISGS	OK		15568	15782	1	0.683972	15394	15869	237.5	0.954789	1
ISGS-3991	Kane	Randall/Bowes subdivision	wood	42.0042	-88.3339	13050	210	-25.3	unpublished	15650	308	Equality Formation above Wedron Group	Hudson Episode	empty	kettle	Elgin 2-26	ISGS	OK	Curry	15305	15921	1	0.683249	15041	16268	613.5	0.954555	1
ISGS-1039	Gallatin	Big Cypress Ditch	Unionid shell	37.73	-88.225	13030	190	ND	Coleman, 1973	15632	281	Equality Formation beyond Wedron Group	Michigan Subepisode	empty	shell (unionid)		ISGS	Questionable Date	Frye	15301	15863	1	0.683334	15084	16181	548.5	0.954518	1
ISGS-900	Greene	Hartwell Levee; HLC-38CD	wood	39.3906	-90.5583	13010	140	-26.3	Liu et al., 1986; Hajic, 1983	15611	218	Equality Formation beyond Wedron Group	Michigan Subepisode	empty	Lake Calhoun		Hajic	OK	Hajic	15331	15767	1	0.682793	15174	16000	413	0.954617	1
ISGS-271	Kankakee	Kankakee dune field SW	peat	41.0234	-87.5859	12990	120	ND	Liu and Coleman, 1981	15583	193	Parkland Sand	Michigan Subepisode	empty	dune		ISGS	OK		15334	15720	1	0.683027	15187	15922	367.5	0.954645	1
ISGS-4393	DeKalb	Hinckley/Kaneville	wood	41.8119	-88.6214	12920	90	-25.2	unpublished	15370	156	Equality Formation above Wedron Group	Michigan Subepisode	empty	kettle	41a-290	ISGS	OK	Grimley	15282	15594	1	0.68352	15168	15747	289.5	0.954652	1
UCIAMS-156035	Lake	Riggle Pond, Oak Ridge Prairie Co. Pk., IN	needle	41.5142	-87.3781	12915	35	ND	Bruegger, 2016	15367	104.5	Equality Formation above Wedron Group	Glenwood II Phase	Lake Chicago	lagoon	Riggle Pond RP1 650-655+640-6	ISGS	OK	Bruegger/Curry	15308	15517	1	0.683841	15245	15620	187.5	0.954833	1
ISGS-2335	Lake	near Bangs Lake	organic silt	42.2536	-88.1306	12900	190	-25.8	Hansel and Johnson, 1996	15344	288.5	Equality Formation above Wedron Group	Michigan Subepisode	empty	kettle	#29	ISGS	OK	Stiernberg	15147	15724	1	0.683148	14747	16038	645.5	0.954643	1
Beta-207028	Fulton	Hajic (2007) EMQ-30	conifer wood, bark	40.3431	-90.0909	12890	40	ND	Hajic et al., 2007	15339	105	Middle Illinois River Valley alluvium	Michigan Subepisode	empty	Lake Calhoun		Hajic	OK	Hajic	15269	15479	1	0.683962	15210	15598	194	0.955064	1
ISGS-6606	Mason	Manito Sand Pit	organic silt	40.3762	-89.9065	12860	120	-22.3	Wang et al., 2012	15307	191.5	Equality Formation beyond Wedron Group	Michigan Subepisode	empty	Lake Calhoun	From profile 3 (side 3) between sand layer 1 and 2.	ISGS	OK	Wang	15178	15561	1	0.683427	15004	15781	388.5	0.954649	1
UCIAMS-110610	Fulton	Emiquon Wildlife Area	wood	40.3429	-90.1026	12795	35	ND	Curry et al., 2014	15238	65.5	Equality Formation beyond Wedron Group	Michigan Subepisode	empty	Lake Calhoun	EMQ-100 wood (1432-1435 cm depth)	ISGS	OK	Curry	15169	15300	1	0.683474	15103	15398	147.5	0.95491	1
ISGS-101	Gallatin	Big Cypress Ditch	mollusk shells	37.73	-88.225	12780	100	ND	Coleman, 1973	15223	161.5	Equality Formation beyond Wedron Group	Michigan Subepisode	empty	shell (unknown gastropods)		ISGS	Questionable Date	Frye	15078	15401	1	0.683014	14865	15623	379	0.95458	1
ISGS-1418	Will	Land and Lakes	wood	41.6664	-88.0564	12770	180	-24.2	Hansel and Johnson, 1986, 1996	15217	337	Peyton Colluvium	Hudson Episode	empty	Chicago Outlet		ISGS	OK	Hansel	14907	15581	1	0.682718	14389	15805	708	0.954537	1
ISGS-1455	Will	Land and Lakes	wood	41.6664	-88.0564	12770	180	-24.2	Hansel and Johnson, 1986, 1996	15217	337	Peyton Colluvium	Hudson Episode	empty	Chicago Outlet	AKH 7-85-24C	ISGS	OK	Hansel	14907	15581	1	0.682718	14389	15805	708	0.954537	1
ISGS-1687	Fayette	Seminary Basin	organic clay	38.9167	-89.1504	12770	370	-29.3	Hansel and Johnson, 1996	15217	638.5	Equality beyond Wedron	Michigan Subepisode	empty	gyttja	1.6 m below ground surface	ISGS	Questionable Date		14493	15770	1	0.683042	13963	16281	1159	0.954539	1
ISGS-2168	Pike	Pittsfield	wood	39.6553	-90.8014	12760	250	-27	Hansel and Johnson, 1996	15206	465.5	Equality beyond Wedron	Michigan Subepisode	empty	slackwater	UPSC-53, 503-507	Van Nest	OK	Van Nest	14725	15656	1	0.682879	14188	15928	870	0.954566	1
ISGS-195	Cass	Cottonwood Sch.	organic clay	40.025	-90.2917	12740	210	ND	Coleman and Liu, 1975	15177	405.5	Peoria Silt	Michigan Subepisode	empty	organic carbon concentrate		ISGS	Questionable Date		14757	15568	1	0.682798	14244	15800	778	0.954593	1
UCIAMS-156034	Lake	Riggle Pond, Oak Ridge Prairie Co. Pk., IN	needle	41.5142	-87.3781	12705	35	ND	Bruegger, 2016	15145	68	Equality Formation above Wedron Group	Glenwood II Phase	Lake Chicago	lagoon	Riggle Pond RP1 125 853-858	ISGS	OK	Bruegger/Curry	15080	15216	1	0.683497	14968	15288	160	0.954998	1
UCIAMS-63071	Kane	Mastodon Lake core	wood	41.741	-88.2974	12695	40	ND	unpublished	15140	76.5	Equality Formation above Wedron Group	Hudson Episode	empty	kettle	451.5	ISGS/ISM	OK	Grimm/Curry	15060	15213	1	0.683079	14923	15284	180.5	0.954947	1
UCIAMS-110608	Fulton	Emiquon Wildlife Area	needle	40.3429	-90.1026	12695	35	ND	Curry et al., 2014	15140	71.5	Equality Formation beyond Wedron Group	Michigan Subepisode	empty	Lake Calhoun	EMQ-100 needles (1422-1432 cm)	ISGS	OK	Curry	15066	15209	1	0.685028	14940	15277	168.5	0.954987	1
UCIAMS-110609	Fulton	Emiquon Wildlife Area	wood	40.3429	-90.1026	12680	40	ND	Curry et al., 2014	15124	83	Equality Formation beyond Wedron Group	Michigan Subepisode	empty	Lake Calhoun	EMQ-100 wood (1422-1432 cm depth)	ISGS	OK	Curry	15033	15199	1	0.683058	14882	15268	193	0.95459	1
UCIAMS-53185	Kane	Mastodon Lake core	cone	41.741	-88.2974	12665	35	ND	unpublished	15104	84	Equality Formation above Wedron Group	Hudson Episode	empty	kettle	451.5	ISGS/ISM	OK	Grimm/Curry	15010	15178	1	0.683477	14856	15240	192	0.954936	1
ISGS-1190	Cook	NE of Burnham/E Sauk Rd	wood	41.4975	-87.5396	12660	140	-25	Hansel and Johnson, 1986, 1996	15100	275	Dolton facies, Henry Fm (Dyer Spit)	Glenwood II Phase	Lake Chicago	spit		ISGS	OK		14730	15280	1	0.683086	14287	15490	601.5	0.954588	1
W-140	Cook	NE of Burnham/E Sauk Rd	wood	41.4975	-87.5396	12650	350	ND	Ruben and Suess, 1955	15091	602.5	Dolton facies, Henry Fm (Dyer Spit)	Glenwood II Phase	Lake Chicago	spit		USGS	OK		14266	15471	1	0.682824	13838	16024	1093	0.954603	1
UCIAMS-38370	McHenry	Crystal Lake	needle, seed	42.2344	-88.3539	12620	220	ND	Gonzales and Grimm, 2009	15063	425	Equality Formation above Wedron Group	Hudson Episode	empty	kettle	2141–2143	ISM/ISGS	OK	Curry	14433	15283	1	0.682879	14109	15649	770	0.954585	1
ISGS-3732	Sangamon	Illiopolis	wood	39.8108	-89.2367	12560	100	-26.8	unpublished	14910	241.5	Equality Formation beyond Wedron Group	Hudson Episode	empty	slackwater	SA-XG-12	Hajic	OK	Hajic	14638	15121	1	0.683173	14287	15195	454	0.954509	1
ISGS-1931	DuPage	Crowleys Marsh, Morton Arboretum	wood	41.8149	-88.0595	12550	270	-25.6	Hansel and Johnson, 1996	14908	473	Equality Formation above Wedron Group	Hudson Episode	empty	bog bottom		ISGS	OK		14252	15198	1	0.682858	13929	15714	892.5	0.954555	1
ISGS-1932	DuPage	Crowleys Marsh, Morton Arboretum	wood	41.8149	-88.0595	12550	140	-26.6	Hansel and Johnson, 1996	14908	309	Equality Formation above Wedron Group	Hudson Episode	empty	bog bottom		ISGS	OK		14501	15119	1	0.683081	14185	15251	533	0.954651	1
ISGS-1332	Will	Land and Lakes	wood	41.6664	-88.0564	12500	110	-25.7	Hansel and Johnson, 1986, 1996	14737	285	Peyton Colluvium	Hudson Episode	empty	Chicago Outlet		ISGS	OK	Hansel	14443	15013	1	0.68311	14200	15132	466	0.954574	1
CAMS-111411	Du Page	Brewster Creek	charcoal, needles	41.9835	-88.2537	12495	45	ND	Curry et al., 2007	14730	198	Equality Formation above Wedron Group	Hudson Episode	empty	kettle	Brewster Ck core 592-594	ISGS	OK	Curry/Grimm	14543	14939	1	0.683201	14325	15047	361	0.954632	1
AA-106430	Jackson	IL.125.Porter Shelter	Mammut americanum	37.7561	-89.3611	12490	80	-20.9	Widga et al., 2017	14722	252	Equality Formation beyond Wedron Group	Hudson Episode	empty	kettle		ISM	OK	Widga	14455	14959	1	0.683412	14249	15085	418	0.954608	1
ISGS-4647	McHenry	Lake in the Hills fen	peat	42.1951	-88.3218	12470	100	-28.2	unpublished	14684	275.5	Grayslake Peat	Hudson Episode	empty	fen	Lith 00-15	ISGS	OK	Miner	14347	14898	1	0.68298	14188	15086	449	0.954656	1
ISGS-2035	Cook	Chicago, 3 km off shore	organic silt	41.8719	-87.5803	12460	140	-26.6	Hansel and Johnson, 1996	14665	315	Equality Formation above Wedron Group	Hudson Episode	empty	Lake Chicago	NPTN-89-1-56	ISGS	OK	Chrzastowski	14284	14914	1	0.683502	14112	15141	514.5	0.954538	1
ISGS-1952	La Salle	Tonica Kettle, TK-2	wood	41.2231	-89.0786	12460	220	-26.8	Hansel and Johnson, 1996	14665	400.5	Equality Formation above Wedron Group	Hudson Episode	empty	kettle	about 1.2-1.4 m	ISGS	OK		14221	15022	1	0.682729	13909	15342	716.5	0.947347	2
ISGS-482	La Salle	Mastodon site: NIU-28 (28-C)	wood	41.6133	-88.745	12410	130	ND	Liu et al., 1986	14500	293	Equality Formation above Wedron Group	Hudson Episode	empty	kettle		ISGS	OK		14195	14781	1	0.683425	14083	15082	499.5	0.954772	1
IU-62	Cook	"Glenwood Beach"	wood	41.5023	-87.5357	12400	300	ND	Schneider and Reshkin, 1970	14401	495.5	Dolton facies, Henry Fm (Dyer Spit)	Glenwood Phase	Lake Chicago	spit		ISGS	Questionable Date		14077	15068	1	0.682736	13716	15586	935	0.954522	1
ISGS-2083	Kane	Biddle Farm	bulk sediment	41.9232	-88.4463	12380	140	-32.4	Hansel and Johnson, 1996	14350	298.5	Equality Formation above Wedron Group	Hudson Episode	empty	kettle	MAG-5,BF-10	ISM	OK	Graham	14150	14747	1	0.683046	14026	15082	528	0.954739	1
UCIAMS-26255	Kendall	Reservation Rd/Morgan Ck	charcoal	41.6376	-87.9074	12370	30	ND	Curry et al., 2014	14280	145	Equality Formation above Wedron Group	Michigan Subepisode	empty	scour channel		ISGS	OK	Curry	14209	14499	1	0.683495	14152	14682	265	0.954983	1
ISGS-5790	Kane	Mastodon Lake	wood	41.7964	-88.2892	12360	130	-25.4	unpublished	14270	281	Equality Formation above Wedron Group	Hudson Episode	empty	kettle	B12-9775-9765	ISGS	OK	Curry	14138	14700	1	0.682998	14016	15042	513	0.954522	1
UCIAMS-108717	Fulton	Emiquon Wildlife Area	leaves	40.3429	-90.1026	12360	40	ND	Curry et al., 2014	14270	152.5	Equality Formation beyond Wedron Group	Michigan Subepisode	empty	Lake Calhoun	EMQ-100; leaves; 1432-1435; base Lake Calhoun	ISGS	OK	Curry	14186	14491	1	0.683387	14132	14689	278.5	0.954597	1
ISGS-1283	Morgan	Meredosia Village Levee;	wood, bark, plant debris, and needles	39.8194	-90.5167	12360	240	-28	Liu et al., 1992	14270	426.5	Equality Formation beyond Wedron Group	Michigan Subepisode	empty	Lake Calhoun		Hajic	OK	Hajic	14067	14920	1	0.683061	13755	15261	753	0.95455	1
AA-4678	Kane	Nelson Lake	needle	41.8328	-88.381	12345	95	ND	Curry et al., 2001	14249	229	Equality Formation above Wedron Group	Hudson Episode	empty	kettle		ISGS/ISM	OK	Curry/Grimm	14142	14600	1	0.68306	14044	14900	428	0.954685	1
UCIAMS-30985	Livingston	Chatsworth Bog	charcoal, needle	40.676	-88.323	12335	30	ND	Grimm et al., 2009	14233	115.5	Equality Formation above Wedron Group	Hudson Episode	empty	kettle	1334–1336	ISM	OK	Nelson	14154	14385	1	0.683902	14107	14589	241	0.95241	2
ISGS-415	Greene	Koster #717	wood	39.2083	-90.55	12325	75	ND	Liu et al., 1986; Wiant et al., 1983	14228	188.5	Alluvial fan (Early Archaic context)	Michigan Subepisode	empty	Lake Calhoun		Hajic	OK		14118	14495	1	0.682974	14048	14758	355	0.954768	1
UCIAMS-30995	McHenry	Crystal Lake	needle, seed	42.2344	-88.3539	12320	35	ND	Gonzales and Grimm, 2009	14221	108	Equality Formation above Wedron Group	Hudson Episode	empty	kettle	2110 cm	ISM/ISGS	OK	Curry	14131	14347	1	0.683187	14086	14568	241	0.954767	1
UCIAMS-38369	McHenry	Crystal Lake	needle, seed	42.2344	-88.3539	12310	120	ND	Gonzales and Grimm, 2009	14207	261.5	Equality Formation above Wedron Group	Hudson Episode	empty	kettle	2115–2117	ISM/ISGS	OK	Curry	14081	14604	1	0.682844	13946	14966	510	0.954692	1
UCIAMS-38367	McHenry	Crystal Lake	needle, seed	42.2344	-88.3539	12295	35	ND	Gonzales and Grimm, 2009	14186	83	Equality Formation above Wedron Group	Hudson Episode	empty	kettle	2079	ISM/ISGS	OK	Curry	14113	14279	1	0.684333	14063	14472	204.5	0.954585	1
UCIAMS-63070	Kane	Mastodon Lake core	seed	41.741	-88.2974	12295	30	ND	unpublished	14186	75.5	Equality Formation above Wedron Group	Hudson Episode	empty	kettle	410	ISGS/ISM	OK	Grimm/Curry	14118	14269	1	0.683748	14070	14444	187	0.954627	1
ISGS-6668	Cass	Arenzville	Py-R of SOC	39.9395	-90.3323	12270	320	-25.6	Wang et al., 2012	14159	522	Peoria Silt beyond Wedron Group	Hudson Episode	empty	loess	see pub for description of site	ISGS	OK		13802	14846	1	0.6827	13474	15369	947.5	0.954519	1
UCIAMS-38368	McHenry	Crystal Lake	needle	42.2344	-88.3539	12255	25	ND	Gonzales and Grimm, 2009	14145	56.5	Equality Formation above Wedron Group	Hudson Episode	empty	kettle	2081–2083	ISM/ISGS	OK	Curry	14090	14203	1	0.685599	14039	14282	121.5	0.9549	1
NZA26128	Ford	IL.51.Hawthorne Farm	Mammut americanum	40.6131	-88.1814	12248	40	-20.7	Saunders et al., 2010	14134	68	Equality Formation above Wedron Group	Hudson Episode	empty	kettle		ISM	OK	Widga	14074	14210	1	0.683098	14003	14322	159.5	0.954836	1
W-161	Cook	NE of Burnham/E Sauk Rd	wood	41.4975	-87.5396	12200	350	ND	Ruben and Suess, 1955	14090	550.5	Dolton facies, Henry Fm (Dyer Spit)	Glenwood Phase	Lake Chicago	spit		USGS	Questionable Date		13737	14838	1	0.683028	13386	15407	1010.5	0.954548	1
ISGS-2917	Lake	Wadsworth	wood	42.4333	-87.9333	12190	70	-24.7	Hansel and Johnson, 1996	14077	101.5	Equality Formation above Wedron Group	Hudson Episode	empty	slackwater	RG-1-93	ISM	OK	Graham	13978	14181	1	0.683427	13806	14317	255.5	0.954712	1
UCIAMS-123991	McHenry	Capron Ridge	wood	42.4425	-88.6977	12180	35	ND	unpublished	14070	57	Equality Formation beyond Wedron Group	Hudson Episode	empty	slackwater	CAP12-2 152-160	ISGS	OK	Curry	14013	14127	1	0.686522	13953	14189	118	0.955015	1
UCIAMS-30944	McHenry	Crystal Lake	needle, seed	42.2344	-88.3539	12180	30	ND	Gonzales and Grimm, 2009	14070	53.5	Equality Formation above Wedron Group	Hudson Episode	empty	kettle	2070 cm	ISM/ISGS	OK	Curry	14017	14124	1	0.685158	13963	14181	109	0.955088	1
UCIAMS-153756	Lake	Riggle Pond, Oak Ridge Prairie Co. Pk., IN	needle	41.5142	-87.3781	12160	30	ND	Bruegger, 2016	14052	54	Equality Formation above Wedron Group	Calumet Phase	Lake Chicago	wood	Riggle Pond 534-539	ISGS	OK	Bruegger/Curry	13997	14105	1	0.684582	13938	14162	112	0.95521	1
UCIAMS-63069	Kane	Mastodon Lake core	needle, seed	41.741	-88.2974	12160	40	ND	unpublished	14052	62.5	Equality Formation above Wedron Group	Hudson Episode	empty	kettle	404.5	ISGS/ISM	OK	Grimm/Curry	13989	14114	1	0.683684	13906	14186	140	0.949617	3
ISGS-1731	Will	Lily Cache Channel	organic silt	41.6476	-88.1242	12150	110	-29.2	Hansel and Johnson, 1996	14041	161.5	Equality Formation above Wedron Group	Hudson Episode	empty	alluvium		ISGS	OK	Hansel/Johnson	13829	14152	1	0.683719	13741	14484	371.5	0.954598	1
ISGS-5858	DuPage	Brewster Creek	wood	41.9917	-88.2333	12120	70	-24.1	Curry et al., 2007	14012	81.5	Equality Formation above Wedron Group	Hudson Episode	empty	kettle	wood above rib	ISGS	OK	Curry	13921	14084	2	0.52958	13772	14156	192	0.954757	1
ISGS-2080	Kane	Biddle Farm	bulk sediment	41.9232	-88.4463	12070	100	-29.9	Hansel and Johnson, 1996	13875	123.5	Equality Formation above Wedron Group	Hudson Episode	empty	kettle	MAG-1,BF-10	ISM	OK	Graham	13787	14034	1	0.684509	13713	14207	247	0.954653	1
CAMS-111410	Du Page	Brewster Creek	needle	41.9835	-88.2537	12055	45	ND	Curry et al., 2007	13875	82.5	Equality Formation above Wedron Group	Hudson Episode	empty	kettle	Brewster Ck core 575	ISGS	OK	Curry/Grimm	13806	13971	1	0.684428	13764	14051	143.5	0.954956	1
AA-97966UF	Kendall	IL.13.Bamford Farm	Mammuthus	41.4795	-88.3	12080	120	-21.4	Widga et al., 2017	13875	145.5	Equality Formation above Wedron Group	Hudson Episode	empty	kettle		ISM	OK	Widga	13779	14070	1	0.682816	13586	14278	346	0.954611	1
ISGS-3741	Wayne	Little Wabash River	wood	38.4464	-88.1686	12080	170	-28.7	Hajic, 1991	13875	230.5	Cahokia Formation	Hudson Episode	empty	alluvium	LW-XW-1	Hajic	OK	Hajic	13728	14189	1	0.68338	13551	14675	562	0.954572	1
ISGS-3132	Alexander	Tamms Correctional	wood	37.2492	-89.2861	12070	320	-26.9	unpublished	13875	494	Cahokia Formation	Hudson Episode	empty	alluvium	WC-103	ISGS	OK	Follmer	13553	14541	1	0.683078	13313	15138	912.5	0.954568	1
ISGS-1433	Will	Land and Lakes	wood	41.6696	-88.0541	12040	160	-25.3	Hansel and Johnson, 1986, 1996	13839	200.5	Peyton Colluvium	Hudson Episode	empty	Chicago Outlet		ISGS	OK	Hansel	13721	14122	1	0.682888	13478	14460	491	0.954597	1
UCIAMS-38366	McHenry	Crystal Lake	needle	42.2344	-88.3539	12025	40	ND	Gonzales and Grimm, 2009	13819	74	Equality Formation above Wedron Group	Hudson Episode	empty	kettle	2064 cm	ISM/ISGS	OK	Curry	13784	13932	1	0.685251	13755	14013	129	0.955504	1
UCIAMS-153757	Lake	Riggle Pond, Oak Ridge Prairie Co. Pk., IN	needle	41.5142	-87.3781	12015	35	ND	Bruegger, 2016	13810	47.5	Equality Formation above Wedron Group	Calumet Phase	Lake Chicago	wood	Riggle Pond 534-539	ISGS	OK	Bruegger/Curry	13779	13874	2	0.488728	13753	13996	121.5	0.955234	1
W-1385	DeKalb	DeKalb	wood	42.0462	-88.603	12000	400	ND	Hansel and Johnson, 1996	13803	583	Henry Formation	Hudson Episode	empty	alluvium		ISGS	OK		13436	14602	1	0.682752	13094	15275	1090.5	0.954579	1
ISGS-911	Jersey	Nutwood Levee	wood	39.15	-90.5575	12000	100	-27.6	Liu et al., 1986; Hajic, 1983	13803	123	Equality Formation beyond Wedron Group	Michigan Subepisode	empty	Lake Calhoun		Hajic	OK		13745	13991	1	0.68277	13587	14095	254	0.954742	1
UCIAMS-63068	Kane	Mastodon Lake core	bract, seed, needle	41.741	-88.2974	11900	30	ND	unpublished	13740	35	Equality Formation above Wedron Group	Hudson Episode	empty	kettle	398 cm	ISGS/ISM	OK	Grimm/Curry	13706	13776	2	0.60233	13582	13782	100	0.954641	1
ISGS-1413	Will	Land and Lakes	wood	41.6696	-88.0541	11880	110	-25.9	Hansel and Johnson, 1986, 1996	13732	127	Peyton Colluvium	Michigan Subepisode	empty	Chicago Outlet		ISGS	OK	Hansel	13559	13813	1	0.683941	13471	13992	260.5	0.954571	1
ISGS-1137	Cook	Chandler Park (Ridge/Lincoln)	wood	42.0642	-87.6862	11870	100	-26.5	Schneider and Hansel, 1990	13729	108	Dolton facies, Henry Fm (Rose Hill Spit)	Calumet Phase	Lake Chicago	wood		ISGS	OK		13564	13780	1	0.684463	13474	13962	244	0.954501	1
IU-67	Cook	Calumet Beach (west)	wood	41.5022	-87.535	11815	640	ND	Schneider and Reshkin, 1970	13685	860.5	Dolton facies, Henry Formation	Calumet Phase	Lake Chicago	littoral		IGS	OK		13063	14784	1	0.682953	12569	15954	1692.5	0.95453	1
ISGS-1159	Cook	Central St., Evanston	wood	42.0738	-87.6841	11810	90	-25.8	Schneider and Hansel, 1990	13685	91.5	Dolton facies, Henry Fm (Rose Hill Spit)	Calumet Phase	Lake Chicago	wood		ISGS	OK		13557	13740	1	0.684898	13447	13800	176.5	0.954532	1
AA-97969	Champaign	IL.60.Manns Chapel	Mammut americanum	40.3308	-87.6544	11820	120	-20.7	Widga et al., 2017	13685	108.5	Equality Formation above Wedron Group	Hudson Episode	empty	kettle		ISM	OK	Widga	13541	13758	2	0.630842	13428	13968	270	0.954508	1
ISGS-6658	Mason	Manito Sand Pit	Py-V of SOC	40.3762	-89.9065	11850	120	-22.5	Wang et al., 2012	13655	120	Equality Formation beyond Wedron Group	Hudson Episode	empty	slackwater	From upper paleosol horizon overlain by peat.	ISGS	OK	Wang	13544	13784	2	0.653909	13449	13990	270.5	0.954553	1
ISGS-3094	Cass	Cottonwood School A	organic carbon concentrated from clay	40.0333	-90.2833	11770	310	-24.1	Grimley et al., 1998	13573	361.5	Peoria Silt	Michigan Subepisode	empty	organic carbon concentrate	CSA Jules	ISGS	Questionable Date	Grimley	13284	14007	1	0.683287	13025	14722	848.5	0.954559	1
UCIAMS-153755	Lake	Riggle Pond, Oak Ridge Prairie Co. Pk., IN	needle	41.5142	-87.3781	11745	35	ND	Bruegger, 2016	13554	48.5	Equality Formation above Wedron Group	Calumet Phase	Lake Chicago	wood	Riggle Pond 465-740	ISGS	OK	Bruegger/Curry	13484	13581	1	0.686175	13458	13637	89.5	0.889576	2
ISGS-5860	DuPage	Brewster Creek	wood	41.9917	-88.2333	11710	70	-25.9	Curry et al., 2007	13535	68.5	Equality Formation above Wedron Group	Hudson Episode	empty	kettle	wood below rib	ISGS	OK	Curry	13450	13587	1	0.684841	13419	13727	154	0.95486	1
ISGS-1117	Cook	Linden Ave., Wilmette	wood	42.0737	-87.6831	11740	270	-27.7	Hansel and Johnson, 1986, 1996	13505	285.5	Dolton facies, Henry Fm (Rose Hill Spit)	Calumet Phase	Lake Chicago	wood		ISGS	OK		13286	13857	2	0.65881	13041	14400	679.5	0.954581	1
ISGS-120	Sangamon	Wedron; Ottawa Terrace	wood	41.335	-88.88	11740	90	ND	Coleman, 1974; Miller, 1973	13505	81	Henry Formation beyond Wedron	Calumet Phase	empty	alluvium		ISGS	OK	Hester	13466	13628	2	0.583801	13414	13759	172.5	0.954783	1
UCIAMS-63067	Kane	Mastodon Lake core	wood	41.741	-88.2974	11665	25	ND	unpublished	13472	21	Equality Formation above Wedron Group	Hudson Episode	empty	kettle	387	ISGS/ISM	OK	Grimm/Curry	13454	13496	2	0.390215	13439	13565	63	0.956797	1
NZA26118	Logan	IL.57.Lincoln College	Mammuthus	40.2233	-89.3825	11635	45	-20.6	Saunders et al., 2010	13456	36.5	Equality Formation above Wedron Group	Hudson Episode	empty	slackwater		ISM	OK	Widga	13421	13494	2	0.543697	13374	13572	99	0.954678	1
ISGS-1180	Cook	Milburn Ave, Central St., Evanston	wood	42.0642	-87.6838	11630	120	-28	Hansel and Johnson, 1986, 1996	13452	119	Dolton facies, Henry Fm (Rose Hill Spit)	Calumet Phase	Lake Chicago	wood		ISGS	OK		13327	13565	1	0.683836	13247	13739	246	0.954817	1
AA-98897UF	Kendall	IL.13.Bamford Farm	Mammut americanum	41.4795	-88.3	11620	110	-20.7	Widga et al., 2017	13448	108.5	Equality Formation above Wedron Group	Hudson Episode	empty	kettle		ISM	OK	Widga	13338	13555	1	0.683217	13257	13722	232.5	0.954901	1
ISGS-985	Cook	Rosehill Cemetery	wood	41.9861	-87.6837	11610	70	-26.8	Liu et al., 1986; Schneider and Hansel, 1990	13445	65	Dolton facies, Henry Fm (Rose Hill Spit)	Calumet Phase	Lake Chicago	littoral		ISGS	OK	Baker/Hansel	13362	13492	2	0.612238	13299	13569	135	0.954888	1
CAMS-111409	Du Page	Brewster Creek	needle	41.9835	-88.2537	11605	45	ND	Curry et al., 2007	13442	49	Equality Formation above Wedron Group	Hudson Episode	empty	kettle	Brewster Ck core 557-579	ISGS	OK	Curry/Grimm	13383	13481	1	0.685715	13323	13552	114.5	0.955659	1
ISGS-6662	Mason	Manito Sand Pit	Py-R of SOC	40.3762	-89.9065	11590	160	-23	Wang et al., 2012	13433	156	Equality Formation beyond Wedron Group	Hudson Episode	empty	slackwater		ISGS	OK	Wang	13263	13575	1	0.683069	13125	13746	310.5	0.954559	1
ISGS-1074	Champaign	Sangamon River	wood	40.2161	-88.3783	11550	130	-29.8	Liu et al., 1986	13402	114	Cahokia Formation	Hudson Episode	empty	alluvium		ISGS	OK		13262	13490	2	0.645031	13114	13619	252.5	0.944174	2
UCIAMS-156036	Lake	Riggle Pond, Oak Ridge Prairie Co. Pk., IN	needle	41.5142	-87.3781	11545	30	ND	Bruegger, 2016	13400	43.5	Equality Formation above Wedron Group	Calumet Phase	Lake Chicago	wood	Riggle Pond RP-1 455-460	ISGS	OK	Bruegger/Curry	13342	13429	1	0.688024	13301	13456	77.5	0.955125	1
AA-101532	DuPage	IL.89.Glen Ellen/Wheaton	Mammut americanum	41.8828	-88.0578	11541	74	-22.4	Widga et al., 2017	13396	67	Equality Formation above Wedron Group	Hudson Episode	empty	kettle		ISM	OK	Widga	13309	13443	1	0.683189	13236	13499	131.5	0.928607	2
UCIAMS-38365	McHenry	Crystal Lake	needle, seed	42.2344	-88.3539	11520	120	ND	Gonzales and Grimm, 2009	13365	112.5	Equality Formation above Wedron Group	Hudson Episode	empty	kettle	2037 cm	ISM/ISGS	OK	Curry	13244	13469	1	0.682697	13117	13572	227.5	0.954613	1
ISGS-5657	Kane	Mastodon Lake, main cut	wood	41.7382	-88.2963	11520	90	-25.5	unpublished	13365	82	Equality Formation above Wedron Group	Hudson Episode	empty	kettle	B12-9815-9805	ISGS	OK	Curry	13282	13446	1	0.685445	13167	13499	166	0.928431	2
ISGS-2171	Pike	Pittsfield	stems	39.6647	-90.7714	11520	270	-28.1	Hansel and Johnson, 1996	13365	261.5	Cahokia Formation	Hudson Episode	empty	alluvium	UPSC-56, 455-470	Van Nest	OK	Van Nest	13084	13607	2	0.675156	12813	13974	580.5	0.954645	1
ISGS-3258	Sangamon	Sangamon River floodplain	wood	39.8106	-89.2367	11520	100	-26.7	unpublished	13365	91.5	Cahokia Formation	Hudson Episode	empty	alluvium	SA-XG-5	Hajic	OK	Hajic	13272	13455	1	0.684242	13154	13551	198.5	0.955107	1
UCIAMS-22177	Du Page	Brewster Creek mammoth tooth	collagen/dentine	41.9835	-88.2537	11455	35	-14.9	Curry et al., 2007	13295	44	Equality Formation above Wedron Group	Hudson Episode	empty	kettle	mastodon tooth	ISGS	OK	Curry	13258	13346	1	0.682882	13206	13401	97.5	0.954809	1
AA-98902	Gallatin	IL.72.Shawneetown	Mammut americanum	37.6918	-88.1361	11450	110	-21.4	Widga et al., 2017	13292	110	Equality Formation beyond Wedron Group	Michigan Subepisode	empty	slackwater		ISM	OK	Widga	13189	13409	1	0.685069	13084	13476	196	0.955073	1
ISGS-1112	Bureau	Selma	carbonized wood	41.562	-89.711	11410	90	-26.5	Hansel and Johnson, 1996	13260	93.5	Cahokia Formation	Hudson Episode	empty	alluvium		ISGS	OK		13144	13331	1	0.683287	13090	13428	169	0.955111	1
UCIAMS-30992	McHenry	Crystal Lake	needle, charcoal	42.2344	-88.3539	11375	50	ND	Gonzales and Grimm, 2009	13235	55.5	Equality Formation above Wedron Group	Hudson Episode	empty	kettle	2025 cm	ISM/ISGS	OK	Curry	13159	13270	1	0.685567	13101	13312	105.5	0.954834	1
AA-98898	Kendall	IL.13.Bamford Farm	Mammut americanum	41.4795	-88.3	11380	110	-21.3	Widga et al., 2017	13235	102	Equality Formation above Wedron Group	Hudson Episode	empty	kettle		ISM	OK	Widga	13110	13314	1	0.683873	13060	13442	191	0.955081	1
ISGS-957	Cook	Lake Michigan North Shore Channel	wood	42	-87.68	11370	150	-26.5	Liu et al., 1986; Schneider and Hansel, 1990	13230	136	Equality Formation above Wedron Group	Calumet Phase	Lake Chicago	littoral		ISGS	OK	Baker/Hansel	13085	13357	1	0.683806	12919	13494	287.5	0.94631	2
ISGS-4137	Madison	Keller Farm, Glen Carbon	Py-V of SOC	38.7484	-90.0028	11350	90	-24.5	Wang et al. 2003b	13180	81	Peoria Silt	Michigan Subepisode	empty	soil organic carbon	KF-B-38; 1.55; Keller Farm PyV	ISGS	Questionable Date	Wang	13113	13275	1	0.684387	13060	13385	162.5	0.954511	1
UCIAMS-38364	McHenry	Crystal Lake	needle	42.2344	-88.3539	11330	30	ND	Gonzales and Grimm, 2009	13173	44.5	Equality Formation above Wedron Group	Hudson Episode	empty	kettle	2022 cm	ISM/ISGS	OK	Curry	13125	13214	1	0.687735	13092	13265	86.5	0.955548	1
A0549	Kane	IL.86.Aurora	Mammut americanum	41.738	-88.298	11320	50	-20.2	Saunders et al., 2010	13152	55.5	Equality Formation above Wedron Group	Hudson Episode	empty	kettle		ISM	OK	Saunders	13106	13217	1	0.683927	13078	13274	98	0.955912	1
ISGS-1164	Cook	Patton Gym, Linden Ave., Wilmette	wood	42.0639	-87.6765	11310	210	-27.1	Schneider and Hansel, 1990	13137	206.5	Dolton facies, Henry Fm (Rose Hill Spit)	Calumet Phase	Lake Chicago	wood		ISGS	OK		12989	13402	1	0.683035	12750	13501	375.5	0.938948	2
Beta-207035	Fulton	Hajic (2007) EMQ-35	rotten wood and bark	40.3493	-90.105	11300	40	ND	Hajic et al., 2007	13129	45.5	Middle Illinois River Valley alluvium	Hudson Episode	empty	alluvium		Hajic	OK	Hajic	13097	13188	1	0.687151	13071	13249	89	0.955518	1
ISGS-528	Livingston	Chatsworth Bog	bulk sediment	40.676	-88.323	11280	110	ND	King, 1986; Grimm et al., 2009	13119	100	Equality	Michigan Subepisode	empty	gyttja/bulk sediment	1151–1159	ISM	Questionable Date	Nelson	13060	13260	1	0.684438	12891	13379	244	0.954679	1
CAMS-70483	Kane	Nelson Lake	needle	41.8328	-88.381	11270	50	ND	Curry et al., 2001	13115	45	Equality Formation above Wedron Group	Hudson Episode	empty	kettle		ISGS/ISM	OK	Curry/Grimm	13075	13165	1	0.683146	13052	13243	95.5	0.954743	1
AA-100632	Cass	IL.73.Sidwell Farm	Mammut americanum	40.0613	-90.0127	11259	72	-21.6	Widga et al., 2017	13110	64	Equality Formation beyond Wedron Group	Hudson Episode	empty	slackwater		ISM	OK	Widga	13062	13190	1	0.683873	13004	13278	137	0.955109	1
ISGS-1165	Cook	Milburn Ave, Central St., Evanston	wood	42.0642	-87.6847	11250	180	-27.5	Hansel and Johnson, 1986, 1996	13106	185	Dolton facies, Henry Fm (Rose Hill Spit)	Calumet Phase	Lake Chicago	wood		ISGS	OK		12923	13293	1	0.683395	12753	13431	339	0.954598	1
ISGS-6666	Mason	Manito Sand Pit	Py-R of SOC	40.3762	-89.9065	11220	80	-20.5	Wang et al., 2012	13083	79.5	Equality Formation beyond Wedron Group	Hudson Episode	empty	slackwater	Pyrolysis residue, upper organic silt	ISGS	OK	Wang	13009	13168	1	0.684498	12885	13269	192	0.954541	1
ISGS-1638	Cook	Teasons Woods	organic silt	41.6848	-87.8736	11210	110	-27.7	Hansel and Johnson, 1996	13078	123.5	Equality Formation above Wedron Group	Calumet Phase	Lake Chicago	wood	4.7 m below ground surface	ISGS	OK		12963	13210	1	0.68286	12809	13284	237.5	0.954614	1
ISGS-1121	Cook	Linden Ave., Wilmette	wood	42.0738	-87.6841	11180	160	-28.1	Hansel and Johnson, 1986, 1996	13059	167	Dolton facies, Henry Fm (Rose Hill Spit)	Calumet Phase	Lake Chicago	wood		ISGS	OK		12841	13175	1	0.683205	12727	13319	296	0.954531	1
ISGS-3095	Bureau	Wyanet	wood	41.3667	-89.65	11170	140	-26.8	Hansel and Johnson, 1996	13056	150	Equality Formation beyond Wedron Group	Hudson Episode	empty	slackwater	RG4-93	Graham	OK	Graham	12845	13145	1	0.684337	12742	13280	269	0.954839	1
Beta-207032	Fulton	Hajic (2007) EMQ-33	bark, wood, leaves	40.3346	-90.1032	11160	40	ND	Hajic et al., 2007	13052	35.5	Middle Illinois River Valley alluvium	Hudson Episode	empty	alluvium		Hajic	OK	Hajic	13010	13081	1	0.682834	12922	13111	94.5	0.954713	1
AA-97968UF	Mason	IL.49.Green Valley	Mammut americanum	40.4075	-89.6429	11130	130	-20.8	Widga et al., 2017	13034	131.5	Equality Formation beyond Wedron Group	Michigan Subepisode	empty	slackwater		ISM	OK	Widga	12830	13093	1	0.683225	12730	13223	246.5	0.954776	1
ISGS-483	Du Page	Mastodon site: NIU-28 (28-B)	wood	41.6133	-88.745	11080	350	ND	Liu et al., 1986	12985	323	Equality Formation above Wedron Group	Hudson Episode	empty	kettle		ISGS	OK		12674	13320	1	0.682694	12361	13726	682.5	0.924997	3
ISGS-1828	Pike	New Salem	woody plant debris	39.6703	-90.8192	11080	100	-28.5	Hansel and Johnson, 1996	12985	106.5	Equality Formation beyond Wedron Group	Michigan Subepisode	empty	slackwater	UPSC-29, 569-584	VanNest	OK	Van Nest	12836	13049	1	0.685264	12734	13102	184	0.955039	1
ISGS-1277	Scott	Vasconellos Sand Pit	wood	39.635	-90.5383	11070	190	-26.4	Liu et al., 1992; Hajic, 1991	12975	160.5	Cahokia Formation	Hudson Episode	empty	alluvium	#2	Hajic	OK	Hajic	12755	13076	1	0.683747	12675	13303	314	0.954599	1
ISGS-463	Lake	Volo Bog	gyttja	42.3514	-88.1846	11070	210	ND	Liu and Coleman, 1981	12975	175	Equality Formation above Wedron Group	Hudson Episode	empty	kettle	852-858 cm	ISGS	Questionable Date	Risatti	12740	13090	1	0.682913	12641	13364	361.5	0.954718	1
UCIAMS-63066	Kane	Mastodon Lake core	needle, seed	41.741	-88.2974	11040	60	ND	unpublished	12880	84.5	Equality Formation above Wedron Group	Hudson Episode	empty	kettle	363.5	ISGS/ISM	OK	Grimm/Curry	12820	12989	1	0.683046	12752	13052	150	0.955489	1
ISGS-5840	DuPage	Brewster Creek	wood, likely larch	41.9917	-88.2333	11020	80	-26.2	Curry et al., 2007	12875	96.5	Equality Formation above Wedron Group	Hudson Episode	empty	kettle	Silt Bed, Basal Peat	ISGS	OK	Curry	12793	12986	1	0.68337	12732	13052	160	0.955034	1
UCIAMS-30993	McHenry	Crystal Lake	needle	42.2344	-88.3539	11020	35	ND	Gonzales and Grimm, 2009	12875	69	Equality Formation above Wedron Group	Hudson Episode	empty	kettle	2051 cm	ISM/ISGS	OK	Curry	12812	12950	1	0.682804	12762	13006	122	0.948822	2
ISGS-3087	Cass	Cottonwood School A	organic carbon concentrated from clay	40.0333	-90.2833	11030	280	-24	Grimley et al., 1998	12875	242.5	Peoria Silt	Michigan Subepisode	empty	organic carbon concentrate	CSA Jules	ISGS	Questionable Date	Grimley	12693	13178	1	0.682911	12387	13491	552	0.950522	3
ISGS-2892	Hancock	Warsaw	organic clay	40.2742	-91.4201	11010	270	-24.1	Hansel and Johnson, 1996	12862	232.5	Peoria Silt beyond Wedron Group	Hudson Episode	empty	loess?	AT-53, 300-310cm	ISGS	OK	Abbott	12685	13150	1	0.683554	12388	13468	540	0.953356	2
ISGS-984	Cook	Lake Michigan North Shore Channel	wood	42	-87.68	11010	130	-27.7	Liu et al., 1986; Schneider and Hansel, 1990	12861	118.5	Equality Formation above Wedron Group	Calumet Phase	Lake Chicago	littoral		ISGS	OK	Baker/Hansel	12758	12995	1	0.683635	12702	13099	198.5	0.954746	1
ISGS-1097	Cook	Rosehill Cemetery	wood	41.9861	-87.6837	11000	80	-26.8	Liu et al., 1986; Schneider and Hansel, 1990	12823	96.5	Dolton facies, Henry Fm (Rose Hill Spit)	Calumet Phase	Lake Chicago	wood		ISGS	OK		12770	12963	1	0.683353	12724	13041	158.5	0.955414	1
ISGS-489b	Du Page	NIU-28; Leland	Mastodon bone/total C	41.6133	-88.745	10990	110	ND	Liu et al., 1986	12807	108	Equality Formation above Wedron Group	Hudson Episode	empty	mastodon	organic fraction	ISGS	OK		12751	12967	1	0.683462	12712	13064	176	0.954745	1
CAMS-111248	Du Page	Brewster Creek	bulrush seeds	41.9835	-88.2537	10980	35	ND	Curry et al., 2007	12800	61.5	Equality Formation above Wedron Group	Hudson Episode	empty	kettle	Brewster Ck core 435	ISGS	OK	Curry/Grimm	12748	12871	1	0.685563	12727	12967	120	0.955706	1
ISGS-1892	Pike	Hannibal	Herbaceous plant debris	39.7089	-91.2683	10980	270	-28.1	Hansel and Johnson, 1996	12800	237	Cahokia Formation	Hudson Episode	empty	alluvium	MVC-119D,290-300cm	Van Nest	OK	Van Nest	12661	13135	1	0.682895	12378	13452	537	0.944877	3
CAMS110994	Kane	IL.86.Aurora	Mammut americanum	41.738	-88.298	10980	60	-20.6	Saunders et al., 2010	12800	82.5	Equality Formation above Wedron Group	Hudson Episode	empty	kettle		ISM	OK	Saunders	12746	12911	1	0.685126	12721	13001	140	0.955158	1
I-1196	DuPage	Mastodon site	wood	41.8855	-88.05	10980	350	ND	Hansel and Johnson, 1996	12800	348.5	Equality Formation above Wedron Group	Hudson Episode	empty	kettle		ISGS	OK		12564	13261	1	0.682937	11978	13596	809	0.95453	1
C-801	Cook	Glenwood	wood	41.5038	-87.5376	10972	350	ND	Libby, 1955	12790	351	Dolton facies, Henry Fm (Rose Hill Spit)	Glenwood Phase	Lake Chicago	spit		USGS	Questionable Date		12558	13260	1	0.682727	11967	13591	812	0.954583	1
UCIAMS-38363	McHenry	Crystal Lake	seed	42.2344	-88.3539	10930	45	ND	Gonzales and Grimm, 2009	12770	40.5	Equality Formation above Wedron Group	Hudson Episode	empty	kettle	2004	ISM/ISGS	OK	Curry	12730	12811	1	0.68502	12704	12910	103	0.954546	1
ISGS-1169	Scott	Vasconellos Sand Pit	wood	39.635	-90.5383	10900	80	-28.7	Liu et al., 1992	12759	66.5	Cahokia Formation	Hudson Episode	empty	alluvium	1 A,B,C	Hajic	OK	Hajic	12705	12838	1	0.684038	12690	12982	146	0.954985	1
ISGS-1189	Cook	Milburn Ave, Central St., Evanston	wood	42.0699	-87.6837	10890	140	-28	Schneider and Hansel, 1990	12748	123.5	Dolton facies, Henry Fm (Rose Hill Spit)	Calumet Phase	Lake Chicago	wood		ISGS	OK		12693	12940	1	0.683474	12588	13066	239	0.954623	1
ISGS-489a	Du Page	NIU-28; Leland	Mastodon bone/apatite	41.6133	-88.745	10890	210	ND	Liu et al., 1986	12748	187.5	Equality Formation above Wedron Group	Hudson Episode	empty	mastodon	apatite	ISGS	OK		12657	13032	1	0.683648	12389	13255	433	0.95382	2
ISGS-1118	Cook	Linden Ave., Wilmette	peat	42.0737	-87.6831	10870	70	-28.4	Schneider and Hansel, 1990	12736	46	Dolton facies, Henry Fm (Rose Hill Spit)	Calumet Phase	Lake Chicago	wood		ISGS	OK		12703	12795	1	0.683036	12676	12929	126.5	0.954765	1
ISGS-5225	DuPage	Brewster Creek	wood	41.9917	-88.2333	10860	70	-26.2	Curry et al., 2007	12731	44.5	Equality Formation above Wedron Group	Hudson Episode	empty	kettle	TC-16.3ft	ISGS	OK	Curry	12700	12789	1	0.685694	12667	12915	124	0.954609	1
ISGS-526	Livingston	Chatsworth Bog	bulk sediment	40.676	-88.323	10855	75	ND	King, 1986; Grimm et al., 2009	12729	48	Equality	Michigan Subepisode	empty	gyttja/bulk sediment	1111–1119	ISM	Questionable Date	Nelson	12697	12793	1	0.683984	12652	12928	138	0.954506	1
ISGS-1850	La Salle	Tonica Kettle, TK2	wood	41.2231	-89.0786	10850	250	-26.7	Hansel and Johnson, 1996	12728	248	Equality Formation above Wedron Group	Hudson Episode	empty	kettle	about 1.2 m below datum	ISGS	OK		12556	13052	1	0.683441	12113	13258	572.5	0.954639	1
ISGS-3026	Monroe	Fogelpole Cave	cave deposit	38.4111	-90.2472	10840	170	-10.1	Panno et al., 2004	12723	163.5	unnamed unit	Hudson Episode	empty	cave	#1	ISGS	OK	Panno	12630	12957	1	0.682759	12421	13084	331.5	0.954643	1
ISGS-3996	Monroe	Fogelpole Cave	Py-R of SOC	38.1917	-90.1333	10830	90	-25.6	Panno et al., 2004	12719	62.5	unnamed unit	Hudson Episode	empty	cave	F98A-Charred Residue	ISGS	OK	Panno/Wang	12676	12801	1	0.684011	12581	12934	176.5	0.953467	2
ISGS-3996	Monroe	Fogelpole Cave	Py-R of SOC	38.1917	-90.1333	10830	90	-25.6	Panno et al., 2004	12719	62.5	unnamed unit	Michigan Subepisode	empty	soil organic carbon	F98A-Charred Residue	ISGS	Questionable Date	Panno/Wang	12676	12801	1	0.684011	12581	12934	176.5	0.953467	2
UCIAMS-63065	Kane	Mastodon Lake core	seed	41.741	-88.2974	10785	30	ND	unpublished	12704	17	Equality Formation above Wedron Group	Hudson Episode	empty	kettle	355	ISGS/ISM	OK	Grimm/Curry	12690	12724	1	0.694404	12677	12742	32.5	0.955944	1
ISGS-2748	Hancock	Warsaw	organic clay	40.2742	-91.4201	10780	250	-23.9	Hansel and Johnson, 1996	12702	241.5	Peoria Silt beyond Wedron Group	Hudson Episode	empty	soil	AT-53, 300-310cm	UIUC	OK	Abbott	12514	12997	2	0.610885	12004	13191	593.5	0.954558	1
ISGS-111	Sangamon	Sangamon R., B-21	wood	39.87	-89.663	10770	290	ND	Coleman, 1974; Miller, 1973	12699	332	Cahokia Formation	Hudson Episode	empty	alluvium	4.6-5.2 depth; base of Cahokia	ISM	OK	Miller	12387	13051	2	0.673477	11917	13272	677.5	0.940931	2
ISGS-1148	Cook	Linden Ave., Wilmette	peat	42.0737	-87.6854	10750	70	-28.6	Schneider and Hansel, 1990	12692	42	Dolton facies, Henry Fm (Rose Hill Spit)	Calumet Phase	Lake Chicago	wood		ISGS	OK		12643	12727	1	0.687003	12568	12750	91	0.955327	1
W-426	Cook	Foster over North Shore Channel	wood	41.9796	-87.7062	10700	300	ND	Rubin and Alexander, 1958	12675	345.5	Equality Formation above Wedron Group	Calumet Phase	Lake Chicago	wood	from Baker collection	USGS	OK		12221	12912	2	0.637463	11699	13223	762	0.950014	3
ISGS-2082	Kane	Biddle Farm	bulk sediment	41.9232	-88.4463	10600	80	-29.7	Hansel and Johnson, 1996	12577	73.5	Equality Formation above Wedron Group	Hudson Episode	empty	kettle	MAG-3,BF-10	ISM	OK	Graham	12528	12675	2	0.615473	12389	12719	165	0.951258	2
ISGS-451	Lake	Volo Bog	gyttja	42.3514	-88.1846	10590	250	ND	Liu and Coleman, 1981	12567	308	Equality Formation above Wedron Group	Hudson Episode	empty	kettle	800-806 cm	ISGS	Questionable Date	Risatti	12109	12725	1	0.68296	11703	13041	669	0.951143	2
ISGS-950	Cook	Lake Michigan North Shore Channel	wood	42	-87.68	10570	80	-25.7	Liu et al., 1986; Schneider and Hansel, 1990	12556	65.5	Equality Formation above Wedron Group	Calumet Phase	Lake Chicago	littoral		ISGS	OK	Baker/Hansel	12517	12648	2	0.478252	12377	12711	167	0.903868	4
CAMS-111247	Du Page	Brewster Creek	needle, seed	41.9835	-88.2537	10555	40	ND	Curry et al., 2007	12550	33.5	Equality Formation above Wedron Group	Hudson Episode	empty	kettle	Brewster Ck core 341.5-345	ISGS	OK	Curry/Grimm	12520	12587	2	0.425153	12419	12643	112	0.955859	1
ISGS-4150	McHenry	Lake-in-the-Hills fen	peat and tufa	42.2	-88.3056	10550	80	-27.4	unpublished	12548	104.5	Grayslake Peat	Hudson Episode	empty	fen	Lith 7b	ISGS	OK	Miner	12418	12627	1	0.685001	12373	12700	163.5	0.851861	3
ISGS-1417	Will	Land and Lakes	wood	41.6664	-88.0564	10530	200	-26.3	Hansel and Johnson, 1986, 1996	12538	227.5	Peyton Colluvium	Hudson Episode	empty	Chicago Outlet	7-85-24D	ISGS	OK	Hansel	12223	12678	2	0.613493	11749	12805	528	0.953253	2
CAMS-116406	Du Page	Brewster Creek	needle	41.9835	-88.2537	10495	35	ND	Curry et al., 2007	12520	38.5	Equality Formation above Wedron Group	Hudson Episode	empty	kettle	Brewster Ck core 389	ISGS	OK	Curry/Grimm	12453	12530	2	0.504739	12383	12573	95	0.933605	2
UCIAMS-63064	Kane	Mastodon Lake core	needle, seed	41.741	-88.2974	10480	30	ND	unpublished	12421	33	Equality Formation above Wedron Group	Hudson Episode	empty	kettle	338.5	ISGS/ISM	OK	Grimm/Curry	12461	12527	2	0.461944	12381	12561	90	0.90799	3
ISGS-989	Scott	Smiling Dan	wood and twigs	39.685	-90.56	10460	220	-29.4	Liu et al., 1992	12412	305.5	Cahokia Formation	Hudson Episode	empty	alluvium	SMD-18 & 74	Hajic	OK	Hajic	12038	12649	1	0.682963	11600	12749	574.5	0.93785	4
ISGS-1810	Scott	Alexander Pit	wood	39.6808	-90.5758	10450	350	-26.9	Hansel and Johnson, 1996	12406	471	Cahokia Formation	Hudson Episode	empty	alluvium		Hajic	OK		11764	12706	1	0.682921	11242	13004	881	0.954649	1
ISGS-4397	Logan	Lincoln Quarry	wood	40.1333	-89.45	10430	70	-27.3	unpublished	12393	67	Cahokia Formation	Hudson Episode	empty	alluvium	LQ-12.5-1	ISGS	OK	Grimley	12225	12359	4	0.326382	12067	12552	242.5	0.954542	1
ISGS-138	Cass	Cottonwood School South	terrestrial snail shells	40.0264	-90.292	10410	650	ND	Coleman, 1974	12386	821.5	Peoria Silt (upper)	Michigan Subepisode	empty	snail shells with secondary carbonate		ISGS	Questionable Date		11236	12879	1	0.682808	10374	13621	1623.5	0.950599	4
ISGS-1301	Pike	Possum Hollow	wood	39.7544	-91.2622	10400	130	-28.6	Hansel and Johnson, 1996	12382	183.5	Cahokia Formation	Hudson Episode	empty	alluvium	MVB-24B,C,D	Leigh	OK	Leigh	12066	12433	2	0.601799	11818	12646	414	0.954742	1
UCIAMS-30991	McHenry	Crystal Lake	needle, charcoal	42.2344	-88.3539	10375	25	ND	Gonzales and Grimm, 2009	12369	40	Equality Formation above Wedron Group	Hudson Episode	empty	kettle	1970 cm	ISM/ISGS	OK	Curry	12160	12240	3	0.307709	12086	12391	152.5	0.954862	1
UCIAMS-30990	McHenry	Crystal Lake	needle, seed, fruit	42.2344	-88.3539	10360	25	ND	Gonzales and Grimm, 2009	12360	54	Equality Formation above Wedron Group	Hudson Episode	empty	kettle	1913–1916	ISM/ISGS	OK	Curry	12130	12238	3	0.396077	12060	12251	95.5	0.562305	2
UCIAMS-38362	McHenry	Crystal Lake	needle, seed, charcoal	42.2344	-88.3539	10320	110	ND	Gonzales and Grimm, 2009	12082	211	Equality Formation above Wedron Group	Hudson Episode	empty	kettle	1947–1948	ISM/ISGS	OK	Curry	11973	12395	1	0.682833	11749	12545	398	0.951379	2
UCIAMS-30984	Livingston	Chatsworth Bog	seed, charcoal	40.676	-88.323	10315	35	ND	Grimm et al., 2009	12079	77	Equality Formation above Wedron Group	Hudson Episode	empty	kettle	1245–1252	ISM	OK	Nelson	12011	12165	3	0.612587	11969	12242	136.5	0.813755	3
ISGS-4863	McHenry	Lake-in-the-Hills fen	peat	42.1976	-88.3218	10310	70	-26.8	unpublished	12060	122	Grayslake Peat	Hudson Episode	empty	fen	Lith 4	ISGS	OK	Miner	11993	12237	3	0.556026	11919	12405	243	0.890259	2
ISGS-6665	Mason	Manito Sand Pit	Py-V of SOC	40.3762	-89.9065	10290	110	-23.5	Wang et al., 2012	12059	151	Equality Formation beyond Wedron Group	Hudson Episode	empty	slackwater	volatile SOM, upper organic silt	ISGS	OK	Wang	11940	12242	4	0.47445	11694	12439	372.5	0.910963	3
ISGS-3620	Massac	Massac Creek	Wood and hickory nuts	37.2167	-88.7083	10260	70	-28.2	unpublished	12040	108.5	Equality Formation beyond Wedron Group	Hudson Episode	empty	slackwater	MC-5a	ISGS	OK	Follmer	11918	12135	2	0.518453	11757	12245	244	0.869165	2
ISGS-1633	Cook	Teasons Woods	wood	41.6848	-87.8736	10250	110	-28.2	Hansel and Johnson, 1996	12026	207.5	Equality Formation above Wedron Group	Calumet Phase	Lake Chicago	wood	4.0 m below ground surface	ISGS	OK		11758	12173	3	0.623122	11600	12422	411	0.923334	5
CAMS-70482	Kane	Nelson Lake	needle	41.8328	-88.381	10240	60	ND	Curry et al., 2001	12010	80.5	Equality Formation above Wedron Group	Hudson Episode	empty	kettle		ISGS/ISM	OK	Curry/Grimm	11921	12082	2	0.464623	11714	12181	233.5	0.928809	4
ISGS-943	Cook	Lake Michigan North Shore Channel	wood	42	-87.68	10180	180	-26.1	Liu et al., 1986; Schneider and Hansel, 1990	11828	269.5	Equality Formation above Wedron Group	Calumet Phase	Lake Chicago	littoral		ISGS	OK	Baker/Hansel	11591	12130	3	0.553461	11254	12423	584.5	0.947907	2
ISGS-3263	Peoria	Kingston	plant debris	40.5539	-89.8533	10170	260	-25.4	Hajic, 1991	11822	410.5	Cahokia Formation	Hudson Episode	empty	alluvium	BNK-1, 614-635	Hajic	OK	Hajic	11346	12167	3	0.653021	11185	12644	729.5	0.954576	1
ISGS-4400	Logan	Lincoln Quarry	wood	40.1333	-89.45	10160	80	-28.9	unpublished	11817	153.5	Cahokia Formation	Hudson Episode	empty	alluvium	LQ-12.5-4	ISGS	OK	Grimley	11699	12006	3	0.629418	11404	12101	348.5	0.954631	1
